# Supplementary material for: Real-time genomics to track COVID-19 post-elimination border incursions in Aotearoa New Zealand
Source: bioRxiv or medRxiv preprint supplement (doi:10.1101/2021.05.13.21257194), 2021-05-17

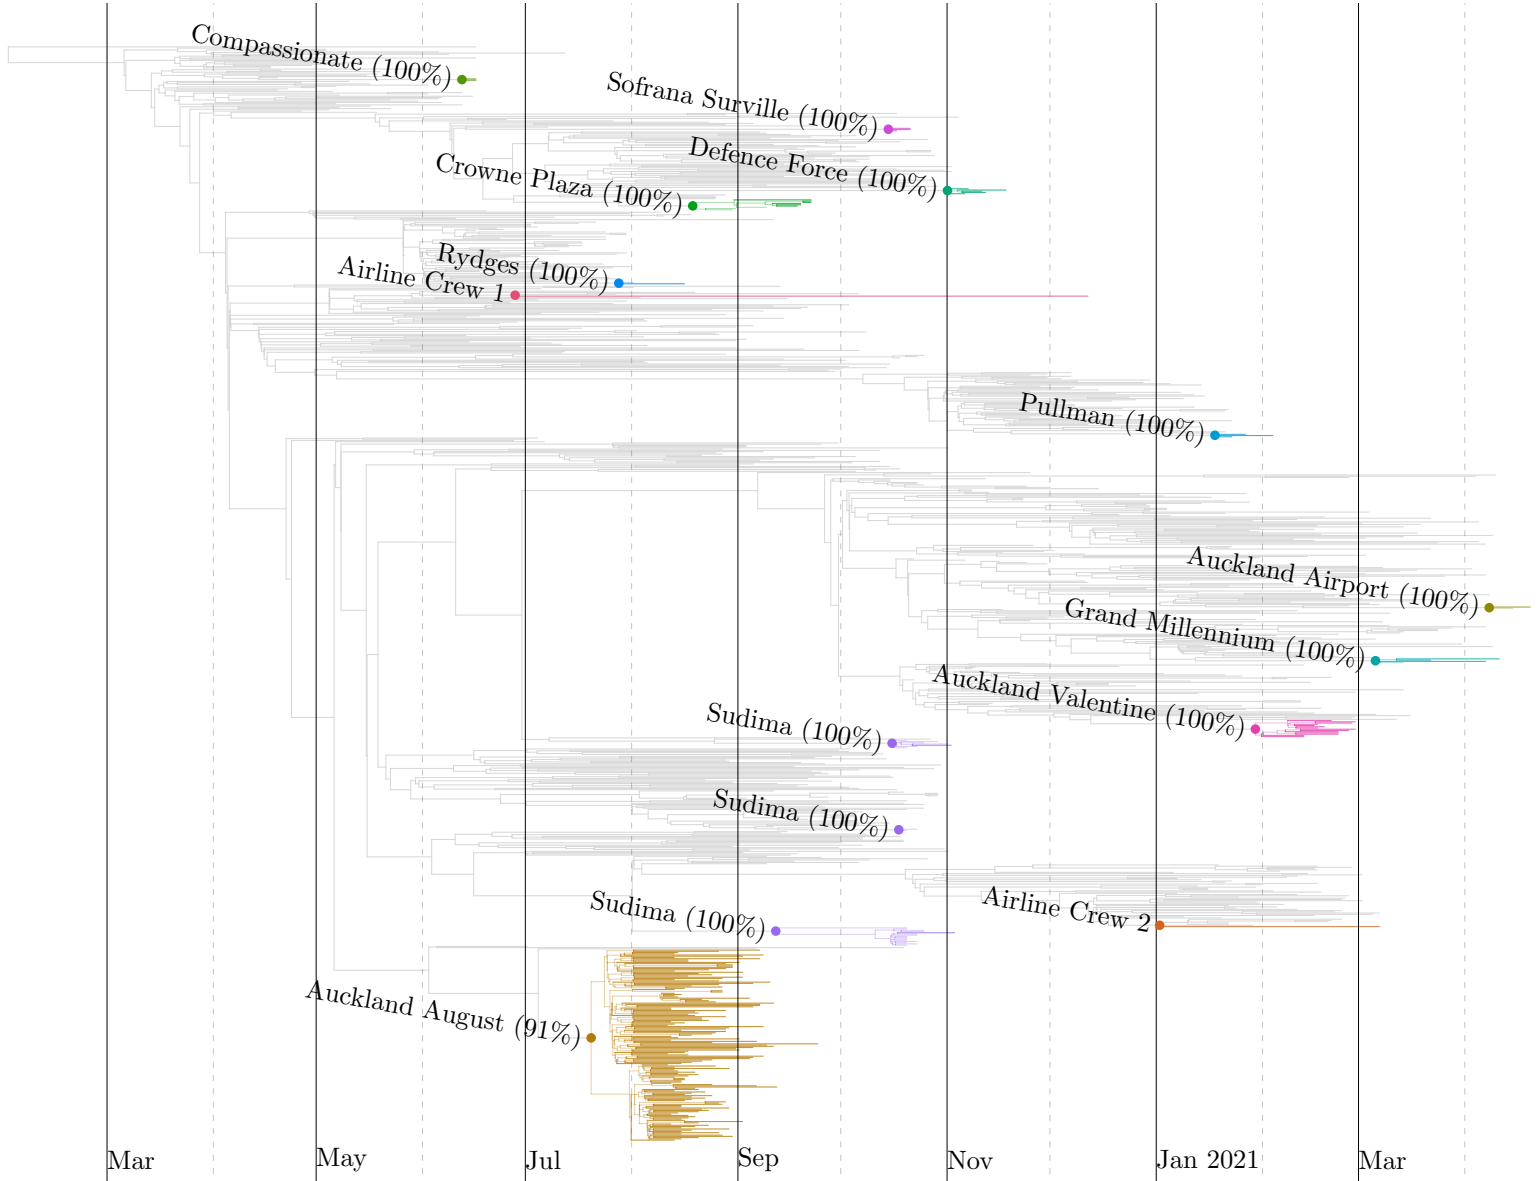

Supplement: Supplementary file [file media-1.pdf]
