# Supplementary material for: Real-time genomics to track COVID-19 post-elimination border incursions in Aotearoa New Zealand
Source: bioRxiv or medRxiv preprint supplement (doi:10.1101/2021.05.13.21257194), 2021-05-17
Supplement: Supplementary file [file media-2.pdf]

We gratefully acknowledge the following Authors from the Originating laboratories responsible for obtaining the specimens, as well as the Submitting laboratories where the genome data were generated and shared via GISAID, on which this research is based.

All Submitters of data may be contacted directly via [www.gisaid.org](http://www.gisaid.org)

Authors are sorted alphabetically.

| Accession ID                                                                                         | Originating Laboratory                                                                                                                   | Submitting Laboratory                                                                                                             | Authors                                                                                                                                                                                                                                                                                                                                                                                                                                                                                                                                                                                                  |
|------------------------------------------------------------------------------------------------------|------------------------------------------------------------------------------------------------------------------------------------------|-----------------------------------------------------------------------------------------------------------------------------------|----------------------------------------------------------------------------------------------------------------------------------------------------------------------------------------------------------------------------------------------------------------------------------------------------------------------------------------------------------------------------------------------------------------------------------------------------------------------------------------------------------------------------------------------------------------------------------------------------------|
| EPI_ISL_1005538                                                                                      | Area of Virology, Serology and Virology Division (SAVID), New South Wales Health Pathology Randwick                                      | Virology Research Laboratory; Area of Virology, Serology and Virology Division (SAVID), New South Wales Health Pathology Randwick | Foster, C.; Au, J.; Ruiz Silva, M.; Deveson, I.; Bull, R.; Van Hal, S.; Rawlinson, W.                                                                                                                                                                                                                                                                                                                                                                                                                                                                                                                    |
| EPI_ISL_1009072                                                                                      | Servicio de Microbiología Clínica (Complejo Hospitalario de Navarra, Pamplona), Instituto de Investigación Sanitaria de Navarra (IdiSNA) | SeqCOVID-SPAIN consortium/IBV(CSIC)                                                                                               | Carmen Ezpeleta Baquedano, Ana Navascués, Ana Miqueleiz and SeqCOVID-SPAIN consortium                                                                                                                                                                                                                                                                                                                                                                                                                                                                                                                    |
| EPI_ISL_1013152                                                                                      | CH de Mayotte                                                                                                                            | National Reference Center for Viruses of Respiratory Infections, Institut Pasteur, Paris                                          | Marion Barbet, Sylvie Behillil, Méline Bizard, Angela Brisebarre, Camille Capel, Etienne Simon-Lorière, Vincent Enouf, Maud Vanpeene, Sylvie van der Werf, Combe Patrice                                                                                                                                                                                                                                                                                                                                                                                                                                 |
| EPI_ISL_1013215, EPI_ISL_1013216, EPI_ISL_1013236                                                    | Institut Pasteur de Guadeloupe                                                                                                           | National Reference Center for Viruses of Respiratory Infections, Institut Pasteur, Paris                                          | Marion Barbet, Sylvie Behillil, Méline Bizard, Angela Brisebarre, Camille Capel, Etienne Simon-Lorière, Vincent Enouf, Maud Vanpeene, Sylvie van der Werf, Talarmin Antoine                                                                                                                                                                                                                                                                                                                                                                                                                              |
| EPI_ISL_1013517                                                                                      | Furst Medical Laboratory                                                                                                                 | Norwegian Institute of Public Health, Department of Virology                                                                      | Kathrine Stene-Johansen, Kamilla Heddeland Instefjord, Hilde Elshaug, Garcia Llorente Ignacio, Engebretsen Serina Beate Atiya R Ali, Marie Paulsen Madsen, Rasmus Riis Kopperud, Hilde Vollan, Karoline Bragstad, Olav Hungnes                                                                                                                                                                                                                                                                                                                                                                           |
| EPI_ISL_1014679, EPI_ISL_1014684                                                                     | National Influenza Center, Virology Department                                                                                           | National Influenza Center                                                                                                         | A Nejadi, J Yavarian, K Sadeghi, NZ Shafiei Jandaghi, V Salimi, N Ghavvami, F Ajminejad and T Mokhtari Azad                                                                                                                                                                                                                                                                                                                                                                                                                                                                                              |
| EPI_ISL_1015130                                                                                      | Department of Virology, Pitié-Salpêtrière hospital                                                                                       | Department of Virology, Pitié-Salpêtrière hospital                                                                                | Valentin Leducq, Aude Jary, Karen Zafilaza, Stéphane Marot, Vincent Calvez, Anne-Geneviève Marcelin                                                                                                                                                                                                                                                                                                                                                                                                                                                                                                      |
| EPI_ISL_1016848                                                                                      | North Shore Hospital                                                                                                                     | Institute of Environmental Science and Research (ESR)                                                                             | Xiaoyun Ren, Matt Storey, Nikki Freed, Muhammad Faisal, Jing Wang, Hermes Perez, Anja Werno, Antje van der Linden, Arlo Upton, Chris Mansell, David Hammer, Dragana Drinkovic, Gary McAuliffe, Hana Sofia Andersson, James Ussher, Jill Sherwood, Josh Freeman, Julia Howard, Juliet Elvy, Mary DeAlmeida, Matt Blakiston, Matthew Rogers, Max Bloomfield, Michael Addidle, Michelle Balm, Sally Roberts, Sarah Jefferies, Sharmini Muttaiyah, Susan Morpeth, Susan Taylor, Timothy Blackmore, Vani Sathyendran, Veronica Playle, Virginia Hope, Erasmus Smit, Lauren Jelly, Olin Silander, Joep de Ligt |
| EPI_ISL_1016855, EPI_ISL_1016865                                                                     | Middlemore Hospital                                                                                                                      | Institute of Environmental Science and Research (ESR)                                                                             | Xiaoyun Ren, Matt Storey, Nikki Freed, Muhammad Faisal, Jing Wang, Hermes Perez, Anja Werno, Antje van der Linden, Arlo Upton, Chris Mansell, David Hammer, Dragana Drinkovic, Gary McAuliffe, Hana Sofia Andersson, James Ussher, Jill Sherwood, Josh Freeman, Julia Howard, Juliet Elvy, Mary DeAlmeida, Matt Blakiston, Matthew Rogers, Max Bloomfield, Michael Addidle, Michelle Balm, Sally Roberts, Sarah Jefferies, Sharmini Muttaiyah, Susan Morpeth, Susan Taylor, Timothy Blackmore, Vani Sathyendran, Veronica Playle, Virginia Hope, Erasmus Smit, Lauren Jelly, Olin Silander, Joep de Ligt |
| EPI_ISL_1016867                                                                                      | LabPLUS                                                                                                                                  | Institute of Environmental Science and Research (ESR)                                                                             | Xiaoyun Ren, Matt Storey, Nikki Freed, Muhammad Faisal, Jing Wang, Hermes Perez, Anja Werno, Antje van der Linden, Arlo Upton, Chris Mansell, David Hammer, Dragana Drinkovic, Gary McAuliffe, Hana Sofia Andersson, James Ussher, Jill Sherwood, Josh Freeman, Julia Howard, Juliet Elvy, Mary DeAlmeida, Matt Blakiston, Matthew Rogers, Max Bloomfield, Michael Addidle, Michelle Balm, Sally Roberts, Sarah Jefferies, Sharmini Muttaiyah, Susan Morpeth, Susan Taylor, Timothy Blackmore, Vani Sathyendran, Veronica Playle, Virginia Hope, Erasmus Smit, Lauren Jelly, Olin Silander, Joep de Ligt |
| EPI_ISL_1016969                                                                                      | University of Sarajevo, Veterinary Faculty, Laboratory for Molecular Diagnostic and Research Laboratory                                  | University of Sarajevo, Veterinary Faculty, Laboratory for Molecular Diagnostic and Research Laboratory                           | Goletic S., Goletic T., Softic A., Alic-Seho A., Nicevic M., Terzic I., Jazic A., Hodzic A., Sabic E.                                                                                                                                                                                                                                                                                                                                                                                                                                                                                                    |
| EPI_ISL_1018079                                                                                      | Immunology, Noguchi Memorial Institute for Medical Research                                                                              | Immunology, Noguchi Memorial Institute for Medical Research                                                                       | Adu, B., Egyri, B., Kumordjie, S., Agbodji, B., Yeboah, C., Mohktar, Q., Oteng, F., Owusu-Nyantakyi, C., Asare, K. M., Appiah-Kubi, J., Adusei-Poku, M. A., Odoom, J. K., Ampofo, W. K., Bonney, J. K.                                                                                                                                                                                                                                                                                                                                                                                                   |
| EPI_ISL_1018306, EPI_ISL_1018317, EPI_ISL_1018327, EPI_ISL_1019640                                   | Department of Health Technology and Informatics, The Hong Kong Polytechnic University                                                    | Department of Health Technology and Informatics, The Hong Kong Polytechnic University                                             | Gilman Kit-Hang Siu, Lam-Kwong Lee, Kenneth Siu-Sing Leung, Jake Siu-Lun Leung, Timothy Ting-Leung Ng, Chloe Toi-Mei Chan, Kingsley King-Gee Tam, Hiu-Yin Lao, Denise Sze-Hang Wong, Alan Ka-Lun Wu, Miranda Chong-Yee Yau, Yvette Wai-Man Lai, Kitty Sau-Chun Fung, Sandy Ka-Yee Chau, Barry Kin-Chung Wong, Wing-Kin To, Kristine Luk, Alex Yat-Man Ho, Tak-Lun Que, Kam-Tong Yip, Wing Cheong Yam, David Ho-Keung Shum, Shea Ping Yip                                                                                                                                                                 |
| EPI_ISL_1032687, EPI_ISL_1032762                                                                     | Illinois Department of Public Health                                                                                                     | Gagnon Lab, Southern Illinois University                                                                                          | Keith Gagnon                                                                                                                                                                                                                                                                                                                                                                                                                                                                                                                                                                                             |
| EPI_ISL_1034439, EPI_ISL_1034467, EPI_ISL_1034599, EPI_ISL_1034604, EPI_ISL_1034605, EPI_ISL_1034711 | Department of Microbiology, The University of Hong Kong                                                                                  | Department of Microbiology, The University of Hong Kong                                                                           | Kelvin K.W. To, Kwok-Yung Yuen                                                                                                                                                                                                                                                                                                                                                                                                                                                                                                                                                                           |
| EPI_ISL_1035722                                                                                      | Dutch COVID-19 response team                                                                                                             | National Institute for Public Health and the Environment (RIVM)                                                                   | Adam Meijer, Harry Vennema, Dirk Eggink, Jeroen Cremer, Sharon van den Brink, Bas van der Veer, AnneMarie van den Brandt, Florian Zwagemaker, Dennis Schmitz, Chantal Reusken, on behalf of the national COVID-19 response team                                                                                                                                                                                                                                                                                                                                                                          |
| EPI_ISL_1039208                                                                                      | Wuhan Institute of Virology.                                                                                                             | State Key Laboratory of Agriculture Microbiology, Huazhong Agric Laboratory of Animal Virology, College of Veterinary Medicine    | Yufei Zhang Kun Huang Zhong Zou Meilin Jin                                                                                                                                                                                                                                                                                                                                                                                                                                                                                                                                                               |
| EPI_ISL_1039212                                                                                      | Biosafety Level 3 (BSL-3) core facility at Huazhong Agricultural University                                                              | State Key Laboratory of Agriculture Microbiology, Huazhong Agric Laboratory of Animal Virology, College of Veterinary Medicine    | Yufei Zhang Kun Huang Zhong Zou Meilin Jin                                                                                                                                                                                                                                                                                                                                                                                                                                                                                                                                                               |
| EPI_ISL_1040716, EPI_ISL_1040726                                                                     | Groote Schuur Hospital wc GSH                                                                                                            | NHLS/UCT                                                                                                                          | Arash Iranzadeh, Deelan Doolabh, Lynn Tyers, Bruna Galvao, Innocent Mudau, Marvin Hsiao, Kruger Marais, Diana Hardie, Stephen Korsman, Carolyn Williamson                                                                                                                                                                                                                                                                                                                                                                                                                                                |
| EPI_ISL_1041206                                                                                      | Hungarian Defence Forces Military Medical Centre                                                                                         | National Laboratory of Virology, Szentágotai Research Centre                                                                      | Endre Gábor Tóth, Balázs Somogyi, Ágnes Balázs-Nagy, Csaba Pereszlényi, Ferenc Jakab, Gábor Kemenesi                                                                                                                                                                                                                                                                                                                                                                                                                                                                                                     |
| EPI_ISL_1048487                                                                                      | National Health Laboratory Service, South Africa                                                                                         | KRISP, KZn Research Innovation and Sequencing Platform                                                                            | Giandhari J, Pillay S, Lessells R, Mdlalose K, York D, Khan S, Emmanuel SJ, Tegally H, Wilkinson E, de Oliveira T                                                                                                                                                                                                                                                                                                                                                                                                                                                                                        |
| EPI_ISL_1055755                                                                                      | Microbiology Department, Complejo Hospitalario Universitario de Santiago                                                                 | Microbiology Department, Complejo Hospitalario Universitario de Vigo                                                              | Microbiology Department, Complejo Hospitalario Universitario de Vigo (CHUVI). Complejo Hospitalario Universitario de Santiago (CHUS).                                                                                                                                                                                                                                                                                                                                                                                                                                                                    |
| EPI_ISL_1058625                                                                                      | University of Liège COVID-19 testing center                                                                                              | GIGA Medical Genomics                                                                                                             | Keith Durkin, Maria Artesi, Bouchra Boujemla, Nathalie Renotte, Cécile Meex, Sébastien Bontems, Fabrice Bureau, Laurent Gillet, Wouter Coppieters, Marie-Pierre Hayette, Vincent Bours                                                                                                                                                                                                                                                                                                                                                                                                                   |
| EPI_ISL_1059684                                                                                      | Viollier AG                                                                                                                              | Department of Biosystems Science and Engineering, ETH Zürich                                                                      | Chaoran Chen, Sarah Nadeau, Ivan Topolsky, Emmanouil Dermitzakis, Keith Harshman, Ioannis Xenarios, Henri Pegeot, Lorenzo Cerutti, Deborah Penet, Philipp Jablonski, Lara Fuhrmann, David Dreifuss, Katharina Jahn, Christiane Beckmann, Maurice Redondo, Olivier Kobel, Christoph Noppen, Sophie Seidel, Noemie Santamaria de Souza, Niko Beerenwinkel, Tanja Stadler                                                                                                                                                                                                                                   |
| EPI_ISL_1060389                                                                                      | Hopital                                                                                                                                  | National Reference Center for Viruses of Respiratory Infections, Institut Pasteur, Paris                                          | Marion Barbet, Sylvie Behillil, Méline Bizard, Angela Brisebarre, Camille Capel, Etienne Simon-Lorière, Vincent Enouf, Maud Vanpeene, Sylvie van der Werf, Foissaud Vincent                                                                                                                                                                                                                                                                                                                                                                                                                              |
| EPI_ISL_1060506, EPI_ISL_1060507, EPI_ISL_1060510, EPI_ISL_1060512                                   | Servicio de Microbiología, Hospital Clínico Universitario de Valencia                                                                    | SeqCOVID-SPAIN consortium/IBV(CSIC)                                                                                               | David Navarro Ortega, Eliseo Albert Vicent, Ignacio Torres and SeqCOVID-SPAIN consortium                                                                                                                                                                                                                                                                                                                                                                                                                                                                                                                 |
| EPI_ISL_1060570                                                                                      | Outre mer                                                                                                                                | National Reference Center for Viruses of Respiratory                                                                              | Marion Barbet, Sylvie Behillil, Méline Bizard, Angela Brisebarre, Camille Capel, Etienne Simon-Lorière, Vincent Enouf, Maud Vanpeene, Sylvie van der                                                                                                                                                                                                                                                                                                                                                                                                                                                     |

|                                                                                     |                                                                                                                                        |                                                                                                                                                                                                                                                   |                                     |                        |                                                                                                                                                                                                                                                                                                                                                                                                                                                                                                                                                                                                                                                            |
|-------------------------------------------------------------------------------------|----------------------------------------------------------------------------------------------------------------------------------------|---------------------------------------------------------------------------------------------------------------------------------------------------------------------------------------------------------------------------------------------------|-------------------------------------|------------------------|------------------------------------------------------------------------------------------------------------------------------------------------------------------------------------------------------------------------------------------------------------------------------------------------------------------------------------------------------------------------------------------------------------------------------------------------------------------------------------------------------------------------------------------------------------------------------------------------------------------------------------------------------------|
| EPI_ISL_1060751, EPI_ISL_1060757                                                    | Instituto de Diagnostico y Referencia Epidemiologicos (INDRE)_RNLS                                                                     | Instituto de Diagnostico y Referencia Epidemiologicos (INDRE)                                                                                                                                                                                     | Infektions, Institut Pasteur, Paris | Werf,Rousset Dominique | Claudia Wong-Arambula, Abril Rodriguez-Maldonado, Fabiola Garcas-Ayala, Adnan Araiza-Rodriguez, David Fragoso-Fonseca, Sergio Rangel-Guerrero, Mayra Jimenez-Morales, Nancy Munoz-Hernandez, Natividad Cruz-Ortiz, Tatiana Nunez-Garcia, Gisela Barrera-Badillo, Lucia Hernandez-Rivas, Irma Lopez-Martinez, Ernesto Ramirez-Gonzalez.                                                                                                                                                                                                                                                                                                                     |
| EPI_ISL_1061412                                                                     | RHS - PRO MIMAROPA                                                                                                                     | Research Institute for Tropical Medicine                                                                                                                                                                                                          |                                     |                        | Hannah Leah Morito, Othoniel Jan Onza, John Leonard Chan, Ma Angelica Tujan, Francisco Gerardo Polotan, Inez Andrea Medado, Kirstyn Brunker, Edelwisa Mercado, Daria Manalo, Catalino Demetria, Joseph Hughes                                                                                                                                                                                                                                                                                                                                                                                                                                              |
| EPI_ISL_1061425                                                                     | Institute of Biocides and Medical Ecology, Belgrade, Serbia                                                                            | Virology Department Institute of Microbiology and Immunology Faculty of Medicine University of Belgrade                                                                                                                                           |                                     |                        | Banko Ana, Miljanovic Danijela, Milicevic Ognjen, Loncar Ana, Abazovic Dzihan, Despot Dragana                                                                                                                                                                                                                                                                                                                                                                                                                                                                                                                                                              |
| EPI_ISL_1063603, EPI_ISL_1063648                                                    | Division of Emerging Infectious Diseases, Bureau of Infectious Diseases Diagnosis Control, Korea Disease Control and Prevention Agency | Division of Emerging Infectious Diseases, Bureau of Infectious Diseases Diagnosis Control, Korea Disease Control and Prevention Agency                                                                                                            |                                     |                        | Ae Kyung Park, Il-Hwan Kim, Heui Man Kim, Jeong-Min Kim, Namjoo Lee, Chaeyoung Lee, Sang Hee Woo, Eun-Jin Kim                                                                                                                                                                                                                                                                                                                                                                                                                                                                                                                                              |
| EPI_ISL_1064646                                                                     | Klinisk mikrobiologi                                                                                                                   | The Public Health Agency of Sweden                                                                                                                                                                                                                |                                     |                        | Oskar Karlsson Lindsjo, Maria Lind Karlberg, Carlo Berg, Anna-Malin Linde, Sofia Stamouli, Samuel Ohman, Reza Advani, Mattias Haukland, Petra Holmstrom, Noura Walai, Petra Edquist, Mia Bryting, Anna Risberg, Karin Tegmark-Wisell                                                                                                                                                                                                                                                                                                                                                                                                                       |
| EPI_ISL_1072962                                                                     | Kota Nopan Primary Health Centre, Mandailing Natal District                                                                            | Institute of Tropical Disease, Universitas Airlangga; Faculty of Medicine, Universitas Sumatera Utara                                                                                                                                             |                                     |                        | Aldise M Nastri, Jezzy R Dewantari, Rima R Prasetya, Krisnoadi Rahardjo, Inke N D Lubis, R Lia Kusumawati, Muhammad Ichwan, Franciscus Ginting, Meliani, Ramadhan Bestari, Mirzan Hasibuan, Irbah R Nainggolan, R Andika D Cahyadi, Yasuko Mori, Soetjipto, Kafuzumi Shimizu, Maria I Lusida                                                                                                                                                                                                                                                                                                                                                               |
| EPI_ISL_1073548                                                                     | Israel Central Virology laboratory                                                                                                     | Israel National Consortium for SARS-CoV-2 sequencing                                                                                                                                                                                              |                                     |                        | Neta Zuckerman, Efrat Dahan Bucris, Michal Mandelboim, Dana Bar-Ilan, Oran Erster, Tzvia Mann, Omer Murik, David A. Zeevi, Assaf Rokney, Joseph Jaffe, Eva Nachum, Maya Davidovich Cohen, Ephraim Fass, Gal Zizelski Valenci, Mor Rubinstein, Efrat Rorman, Israel Nissan, Efrat Glick-Saar, Omri Nayshool, Gideon Rechavi, Ella Mendelson, Orna Mor                                                                                                                                                                                                                                                                                                       |
| EPI_ISL_1082257, EPI_ISL_1082258, EPI_ISL_1082259, EPI_ISL_1082262, EPI_ISL_1082264 | Middlemore Hospital                                                                                                                    | Institute of Environmental Science and Research (ESR)                                                                                                                                                                                             |                                     |                        | Rachel Boyle, SallyAnn Harbison, Olivia Stroeven, Xiaoyun Ren, Matt Storey, Nikki Freed, Muhammad Faisal, Jing Wang, Hermes Perez, Anja Werno, Antje van der Linden, Arlo Upton, Chris Mansell, David Hammer, Dragana Drinkovic, Gary McAuliffe, Hana Sofia Andersson, James Ussher, Jill Sherwood, Josh Freeman, Julia Howard, Juliet Elvy, Mary DeAlmeida, Matt Blakiston, Matthew Rogers, Max Bloomfield, Michael Addidle, Michelle Balm, Sally Roberts, Sarah Jefferies, Sharmini Muttaiyah, Susan Morpeth, Susan Taylor, Timothy Blackmore, Vani Sathyendran, Veronica Playle, Virginia Hope, Erasmus Smit, Lauren Jelly, Olin Silander, Joep de Ligt |
| EPI_ISL_1082265, EPI_ISL_1082266                                                    | LabPLUS                                                                                                                                | Institute of Environmental Science and Research (ESR)                                                                                                                                                                                             |                                     |                        | Rachel Boyle, SallyAnn Harbison, Olivia Stroeven, Xiaoyun Ren, Matt Storey, Nikki Freed, Muhammad Faisal, Jing Wang, Hermes Perez, Anja Werno, Antje van der Linden, Arlo Upton, Chris Mansell, David Hammer, Dragana Drinkovic, Gary McAuliffe, Hana Sofia Andersson, James Ussher, Jill Sherwood, Josh Freeman, Julia Howard, Juliet Elvy, Mary DeAlmeida, Matt Blakiston, Matthew Rogers, Max Bloomfield, Michael Addidle, Michelle Balm, Sally Roberts, Sarah Jefferies, Sharmini Muttaiyah, Susan Morpeth, Susan Taylor, Timothy Blackmore, Vani Sathyendran, Veronica Playle, Virginia Hope, Erasmus Smit, Lauren Jelly, Olin Silander, Joep de Ligt |
| EPI_ISL_1082267                                                                     | Middlemore Hospital                                                                                                                    | Institute of Environmental Science and Research (ESR)                                                                                                                                                                                             |                                     |                        | Rachel Boyle, SallyAnn Harbison, Olivia Stroeven, Xiaoyun Ren, Matt Storey, Nikki Freed, Muhammad Faisal, Jing Wang, Hermes Perez, Anja Werno, Antje van der Linden, Arlo Upton, Chris Mansell, David Hammer, Dragana Drinkovic, Gary McAuliffe, Hana Sofia Andersson, James Ussher, Jill Sherwood, Josh Freeman, Julia Howard, Juliet Elvy, Mary DeAlmeida, Matt Blakiston, Matthew Rogers, Max Bloomfield, Michael Addidle, Michelle Balm, Sally Roberts, Sarah Jefferies, Sharmini Muttaiyah, Susan Morpeth, Susan Taylor, Timothy Blackmore, Vani Sathyendran, Veronica Playle, Virginia Hope, Erasmus Smit, Lauren Jelly, Olin Silander, Joep de Ligt |
| EPI_ISL_1084610                                                                     | Hospital for Infectious Diseases, Molecular Diagnostics Laboratory, Warsaw, Poland                                                     | 8. Laboratory of Recombinant Vaccines, Intercollegiate Faculty of Biotechnology University of Gdansk and Medical University of Gdansk, 2. ViroGenetics - BSL3 Laboratory of Virology, Maopolska Centre of Biotechnology, Jagiellonian University  |                                     |                        | Lukasz Rabalski, Maciej Kosinski, Natalia Mazur-Panasiuk, Aneta Kopacz, Piotr Zabek, Tomasz Dyda, Andrzej Horban, Krzysztof Pyrc, Krystyna Bienkowska-Szewczyk                                                                                                                                                                                                                                                                                                                                                                                                                                                                                             |
| EPI_ISL_1084612                                                                     | Hospital for Infectious Diseases, Molecular Diagnostics Laboratory, Warsaw, Poland                                                     | 40. Laboratory of Recombinant Vaccines, Intercollegiate Faculty of Biotechnology University of Gdansk and Medical University of Gdansk, 2. ViroGenetics - BSL3 Laboratory of Virology, Maopolska Centre of Biotechnology, Jagiellonian University |                                     |                        | Lukasz Rabalski, Maciej Kosinski, Natalia Mazur-Panasiuk, Aneta Kopacz, Piotr Zabek, Tomasz Dyda, Andrzej Horban, Krzysztof Pyrc, Krystyna Bienkowska-Szewczyk                                                                                                                                                                                                                                                                                                                                                                                                                                                                                             |
| EPI_ISL_1091260                                                                     | Laboratorio PGM                                                                                                                        | Laboratorio de Infectologia Molecular, Departamento de Bioquimica y Medicina Molecular, Facultad de Medicina - Universidad Autónoma de Nuevo León                                                                                                 |                                     |                        | Kame A. Galán-Huerta, María F. Herrera-Saldivar, Natalia Martínez-Acuña, Sonia A. Lozano-Sepúlveda, Daniel Arellanos-Soto, Ana M. Rivas-Estilla, Javier Ramos-Jimenez, Gabriela Elizondo, Eduardo Garza-de-la-Peña                                                                                                                                                                                                                                                                                                                                                                                                                                         |
| EPI_ISL_1091466                                                                     | National Institute of Public Health - National Institute of Hygiene                                                                    | 1. National Institute of Public Health - National Institute of Hygiene; 2. Eurofins Genomics Europe Sequencing GmbH                                                                                                                               |                                     |                        | Wokowicz Tomasz, Zacharczuk Katarzyna, Sadkowska-Todys Magorzata, Gierczyki Rafa, Eurofins Genomics Europe Sequencing Team, ECDC COVID-19 WGS support team                                                                                                                                                                                                                                                                                                                                                                                                                                                                                                 |
| EPI_ISL_1093216                                                                     | KU Leuven, Rega Institute, Clinical and Epidemiological Virology                                                                       | KU Leuven, Rega Institute, Clinical and Epidemiological Virology                                                                                                                                                                                  |                                     |                        | Tony Wawina-Bokalanga, Bert Vanmechelen, Joan Marti-Carerras, Piet Maes                                                                                                                                                                                                                                                                                                                                                                                                                                                                                                                                                                                    |
| EPI_ISL_1097227                                                                     | Ministry of Health Turkey                                                                                                              | Ministry of Health Turkey                                                                                                                                                                                                                         |                                     |                        | Fatma Bayraktar, Yasemin Cosgun, Suleyman Yalcin, Gulay Korukluoglu                                                                                                                                                                                                                                                                                                                                                                                                                                                                                                                                                                                        |
| EPI_ISL_1098606                                                                     | Virology Unit, Institut Pasteur du Cambodge                                                                                            | Virology Unit, Institut Pasteur du Cambodge                                                                                                                                                                                                       |                                     |                        | Sokhou Yann, Ly Sovann, Kraing Sidonn, Yi Sengdoern, Chin Savuth, Chau Darapheap, Veasna Duong, Erik A Karlsson                                                                                                                                                                                                                                                                                                                                                                                                                                                                                                                                            |
| EPI_ISL_1098794                                                                     | Institute of Microbiology and Immunology, Faculty of Medicine, University of Ljubljana                                                 | Institute of Microbiology and Immunology, Faculty of Medicine, University of Ljubljana                                                                                                                                                            |                                     |                        | Alen Sulji, Samo Zakotnik, Tomaž Mark Zorec, Matic Brvar, Doroteja Vljaj, Andrej Celar, Dominika Šturm, Patricija Pozvek, Špela Pleh, Miša Korva, Mario Poljak, Tatjana Avši - Županc                                                                                                                                                                                                                                                                                                                                                                                                                                                                      |
| EPI_ISL_1113755, EPI_ISL_1113756                                                    | Middlemore Hospital                                                                                                                    | Institute of Environmental Science and Research (ESR)                                                                                                                                                                                             |                                     |                        | Rachel Boyle, SallyAnn Harbison, Olivia Stroeven, Xiaoyun Ren, Matt Storey, Nikki Freed, Muhammad Faisal, Jing Wang, Hermes Perez, Anja Werno, Antje van der Linden, Arlo Upton, Chris Mansell, David Hammer, Dragana Drinkovic, Gary McAuliffe, Hana Sofia Andersson, James Ussher, Jill Sherwood, Josh Freeman, Julia Howard, Juliet Elvy, Mary DeAlmeida, Matt Blakiston, Matthew Rogers, Max Bloomfield, Michael Addidle, Michelle Balm, Sally Roberts, Sarah Jefferies, Sharmini Muttaiyah, Susan Morpeth, Susan Taylor, Timothy Blackmore, Vani Sathyendran, Veronica Playle, Virginia Hope, Erasmus Smit, Lauren Jelly, Olin Silander, Joep de Ligt |
| EPI_ISL_1113757                                                                     | LabTests                                                                                                                               | Institute of Environmental Science and Research (ESR)                                                                                                                                                                                             |                                     |                        | Rachel Boyle, SallyAnn Harbison, Olivia Stroeven, Xiaoyun Ren, Matt Storey, Nikki Freed, Muhammad Faisal, Jing Wang, Hermes Perez, Anja Werno, Antje van der Linden, Arlo Upton, Chris Mansell, David Hammer, Dragana Drinkovic, Gary McAuliffe, Hana Sofia Andersson, James Ussher, Jill Sherwood, Josh Freeman, Julia Howard, Juliet Elvy, Mary DeAlmeida, Matt Blakiston, Matthew Rogers, Max Bloomfield, Michael Addidle, Michelle Balm, Sally Roberts, Sarah Jefferies, Sharmini Muttaiyah, Susan Morpeth, Susan Taylor, Timothy Blackmore, Vani Sathyendran, Veronica Playle, Virginia Hope, Erasmus Smit, Lauren Jelly, Olin Silander, Joep de Ligt |
| EPI_ISL_1113758                                                                     | Middlemore Hospital                                                                                                                    | Institute of Environmental Science and Research (ESR)                                                                                                                                                                                             |                                     |                        | Rachel Boyle, SallyAnn Harbison, Olivia Stroeven, Xiaoyun Ren, Matt Storey, Nikki Freed, Muhammad Faisal, Jing Wang, Hermes Perez, Anja Werno, Antje van der Linden, Arlo Upton, Chris Mansell, David Hammer, Dragana Drinkovic, Gary McAuliffe, Hana Sofia Andersson, James Ussher, Jill Sherwood, Josh Freeman, Julia Howard, Juliet Elvy, Mary DeAlmeida, Matt Blakiston, Matthew Rogers, Max Bloomfield, Michael Addidle, Michelle Balm, Sally Roberts, Sarah Jefferies, Sharmini Muttaiyah, Susan Morpeth, Susan Taylor, Timothy Blackmore, Vani Sathyendran, Veronica Playle, Virginia Hope, Erasmus Smit, Lauren Jelly, Olin Silander, Joep de Ligt |
| EPI_ISL_1114767, EPI_ISL_1114771, EPI_ISL_1116454                                   | National Institute of Infectious Diseases-Prof. Dr. Matej Bals Molecular Diagnostics Laboratory                                        | National Institute of Infectious Diseases-Prof. Dr. Matej Bals Molecular Diagnostics Laboratory                                                                                                                                                   |                                     |                        | Leontina Banica, Marius Surleac, Corina Casangiu, Petre Mliu, Andreea Tudor, Simona Paraschiv, Dan Otelea                                                                                                                                                                                                                                                                                                                                                                                                                                                                                                                                                  |
| EPI_ISL_1117494                                                                     | SIESP DIP PREV CHIETI                                                                                                                  | Istituto Zooprofilattico Sperimentale dell'Abruzzo e Molise "G. Caporale"                                                                                                                                                                         |                                     |                        | Lorusso A, Marcacci M, Di Domenico M, Ancora M, Curini V, Mangone I, Rinaldi A, Scialabba S, Di Pasquale A, Cammà C, Scialabba S, Puglia I, Calistri P, Savini G                                                                                                                                                                                                                                                                                                                                                                                                                                                                                           |
| EPI_ISL_1117816                                                                     | Institut für Pathologie, Salzkammergut Klinikum Vöcklabruck                                                                            | Berghaler laboratory, CeMM Research Center for Molecular Medicine of the Austrian Academy of Sciences                                                                                                                                             |                                     |                        | Lukas Endler, Anna Schedl, Thomas Penz, Benedikt Agerer, Maelle Le Moing, Michael Schuster, Bekir Erguner, Jan Laine, Martin Senekowitsch, Christoph Bock, Andreas Berghaler                                                                                                                                                                                                                                                                                                                                                                                                                                                                               |

|                                                                                                                                                                          |                                                                                                                                                   |                                                                                                                                                   |                                                                                                                                                                                                                                                                                                                                                                                                                                                                          |
|--------------------------------------------------------------------------------------------------------------------------------------------------------------------------|---------------------------------------------------------------------------------------------------------------------------------------------------|---------------------------------------------------------------------------------------------------------------------------------------------------|--------------------------------------------------------------------------------------------------------------------------------------------------------------------------------------------------------------------------------------------------------------------------------------------------------------------------------------------------------------------------------------------------------------------------------------------------------------------------|
| EPI_ISL_1117845                                                                                                                                                          | Klinikum Wels-Grieskirchen                                                                                                                        | Bergthaler laboratory, CeMM Research Center for Molecular Medicine of the Austrian Academy of Sciences                                            | Lukas Endler, Anna Schedl, Thomas Penz, Benedikt Agerer, Maelle Le Moing, Michael Schuster, Bekir Erguner, Jan Laine, Martin Senekowitsch, Christoph Bock, Andreas Bergthaler                                                                                                                                                                                                                                                                                            |
| EPI_ISL_1118081                                                                                                                                                          | HG Pharma GmbH                                                                                                                                    | Bergthaler laboratory, CeMM Research Center for Molecular Medicine of the Austrian Academy of Sciences                                            | Lukas Endler, Anna Schedl, Thomas Penz, Benedikt Agerer, Maelle Le Moing, Michael Schuster, Bekir Erguner, Jan Laine, Martin Senekowitsch, Christoph Bock, Andreas Bergthaler                                                                                                                                                                                                                                                                                            |
| EPI_ISL_1118177                                                                                                                                                          | LAB ANALISI PO CARDARELLI CAMPOBASSO                                                                                                              | Istituto Zooprofilattico Sperimentale dell'Abruzzo e Molise "G. Caporale"                                                                         | Scutellà M, Niro G, Felice V. Lorusso A, Marccacci M, Di Domenico M, Ancora M, Curini V, Mangone I, Rinaldi A, Scialabba S, Di Pasquale A, Cammà C, Puglia I, Calistri P, Savini G                                                                                                                                                                                                                                                                                       |
| EPI_ISL_1119048, EPI_ISL_1119049                                                                                                                                         | Viollier AG                                                                                                                                       | Department of Biosystems Science and Engineering, ETH Zürich                                                                                      | Chaoran Chen, Sarah Nadeau, Ivan Topolsky, Emmanouil Dermizakis, Keith Harshman, Ioannis Xenarios, Henri Pegeot, Lorenzo Cerutti, Deborah Penet, Philipp Jablonski, Lara Fuhrmann, David Dreifuss, Katharina Jahn, Christiane Beckmann, Maurice Redondo, Olivier Kobel, Christoph Noppen, Sophie Seidel, Noemie Santamaria de Souza, Niko Beerenwinkel, Tanja Stadler                                                                                                    |
| EPI_ISL_1127652                                                                                                                                                          | Pathogen Genomics Center, National Institute of Infectious Diseases                                                                               | Pathogen Genomics Center, National Institute of Infectious Diseases                                                                               | Tsuyoshi Sekizuka, Kentaro Itokawa, Rina Tanaka, Masanori Hashino, Makoto Kuroda                                                                                                                                                                                                                                                                                                                                                                                         |
| EPI_ISL_1129326                                                                                                                                                          | Viollier AG                                                                                                                                       | Department of Biosystems Science and Engineering, ETH Zürich                                                                                      | Chaoran Chen, Sarah Nadeau, Catharine Aquino, Ivan Topolsky, Philipp Jablonski, Lara Fuhrmann, David Dreifuss, Katharina Jahn, Andreia Cabral de Gouvea, Maria Domenica Moccia, Simon Grüter, Timothy Sykes, Lennart Opitz, Griffin White, Laura Neff, Doris Popovic, Andrea Patrignani, Jay Tracy, Ralph Schlapbach, Christiane Beckmann, Maurice Redondo, Olivier Kobel, Christoph Noppen, Sophie Seidel, Noemie Santamaria de Souza, Niko Beerenwinkel, Tanja Stadler |
| EPI_ISL_1130468                                                                                                                                                          | Viollier AG                                                                                                                                       | Department of Biosystems Science and Engineering, ETH Zürich                                                                                      | Christian Beisel, Sarah Nadeau, Chaoran Chen, Ivan Topolsky, Philipp Jablonski, Lara Fuhrmann, David Dreifuss, Katharina Jahn, Rebecca Denes, Mirjam Feldkamp, Ina Nissen, Natascha Santacroce, Elodie Burcklen, Christiane Beckmann, Maurice Redondo, Olivier Kobel, Christoph Noppen, Sophie Seidel, Noemie Santamaria de Souza, Niko Beerenwinkel, Tanja Stadler                                                                                                      |
| EPI_ISL_1132702, EPI_ISL_1132708                                                                                                                                         | Vaccines and Infectious Diseases Analytics Research Unit (VIDA)                                                                                   | KRISP, KZn Research Innovation and Sequencing Platform                                                                                            | Baillie Vicky, du Plessis Jeanine, Giandhari Jennifer, Pillay Sureshnee, Naidoo Yeshnee, Tegally Houriyah, de Oliveira Tulio, Madhi Shabir                                                                                                                                                                                                                                                                                                                               |
| EPI_ISL_1138564                                                                                                                                                          | Laboratory of Communicable Diseases                                                                                                               | 1. Laboratory of Communicable Diseases (Estonia); 2. Eurofins Genomics Europe Sequencing GmbH                                                     | Liidia Dotsenko                                                                                                                                                                                                                                                                                                                                                                                                                                                          |
| EPI_ISL_1138573                                                                                                                                                          | SYNLAB Eesti OÜ                                                                                                                                   | 1. Laboratory of Communicable Diseases (Estonia); 2. Eurofins Genomics Europe Sequencing GmbH                                                     | Liidia Dotsenko                                                                                                                                                                                                                                                                                                                                                                                                                                                          |
| EPI_ISL_1138670                                                                                                                                                          | Institut für Medizinische Virologie, Universitätsklinikum Frankfurt                                                                               | Institut für Medizinische Virologie, Universitätsklinikum Frankfurt                                                                               | Barbara Muehlemann et al                                                                                                                                                                                                                                                                                                                                                                                                                                                 |
| EPI_ISL_1140414                                                                                                                                                          | Labor ZOTZKLIMAS; MVZ Düsseldorf-Centrum                                                                                                          | Robert Koch Institute                                                                                                                             | unknown                                                                                                                                                                                                                                                                                                                                                                                                                                                                  |
| EPI_ISL_1142446, EPI_ISL_1143013                                                                                                                                         | LabKom - Labor an der Salzbrücke MVZ GmbH                                                                                                         | Robert Koch Institute                                                                                                                             | unknown                                                                                                                                                                                                                                                                                                                                                                                                                                                                  |
| EPI_ISL_1163839                                                                                                                                                          | Microbiology and Virology Unit, Azienda Ospedale Padova, Padova, Italy                                                                            | Department of Molecular Medicine, Computational Medicine Group, Univeresity of Padova, Padova, Italy                                              | Elisa Franchin, Claudia Del Vecchio, Francesco Onelia, Stefano Toppo, Enrico Lavezzo, Laura Manuto, Federico Bianca, Marco Grazioli, Andrea Crisanti                                                                                                                                                                                                                                                                                                                     |
| EPI_ISL_1165069                                                                                                                                                          | Siti Khodijah Hospital                                                                                                                            | Institute of Tropical Disease, Universitas Airlangga                                                                                              | Rima R Prasetya, Krisnoadi Rahardjo, Aldise M Nastri, Jezzy R Dewantari, Muhammad Hamdan, Gatot Soegiarto, Laksmi Wulandari, Resti Yudhawati, Yasuko Mori, Soetjipto, Kazufumi Shimizu, Maria I Lusida                                                                                                                                                                                                                                                                   |
| EPI_ISL_1165076                                                                                                                                                          | Rahman Rahim Hospital                                                                                                                             | Institute of Tropical Disease, Universitas Airlangga                                                                                              | Jezzy R Dewantari, Rima R Prasetya, Krisnoadi Rahardjo, Aldise M Nastri, Rendra E Febrianto, Gatot Soegiarto, Laksmi Wulandari, Resti Yudhawati, Yasuko Mori, Soetjipto, Kazufumi Shimizu, Maria I Lusida                                                                                                                                                                                                                                                                |
| EPI_ISL_1165631                                                                                                                                                          | Dutch COVID-19 response team                                                                                                                      | National Institute for Public Health and the Environment (RIVM)                                                                                   | Adam Meijer, Harry Vennema, Dirk Eggink, Jeroen Cremer, Sharon van den Brink, Bas van der Veer, AnneMarie van den Brandt, Florian Zwagemaker, Dennis Schmitz, Chantal Reusken, on behalf of the national COVID-19 response team                                                                                                                                                                                                                                          |
| EPI_ISL_1167021                                                                                                                                                          | Hopital                                                                                                                                           | National Reference Center for Viruses of Respiratory Infections, Institut Pasteur, Paris                                                          | Marion Barbet, Sylvie Behillil, Méline Bizard, Angela Brisebarre, Camille Capel, Etienne Simon-Lorière, Vincent Enouf, Maud Vanpeene, Sylvie van der Werf, Combe Patrice                                                                                                                                                                                                                                                                                                 |
| EPI_ISL_1167625                                                                                                                                                          | Ministry of Health Turkey                                                                                                                         | Ministry of Health Turkey                                                                                                                         | Fatma Bayrakdar, Yasemin Cosgun, Suleyman Yalcin, Gulay Korukluoglu                                                                                                                                                                                                                                                                                                                                                                                                      |
| EPI_ISL_1168193                                                                                                                                                          | Hopital                                                                                                                                           | National Reference Center for Viruses of Respiratory Infections, Institut Pasteur, Paris                                                          | Marion Barbet, Sylvie Behillil, Méline Bizard, Angela Brisebarre, Camille Capel, Etienne Simon-Lorière, Vincent Enouf, Maud Vanpeene, Sylvie van der Werf, Hermann CéCile                                                                                                                                                                                                                                                                                                |
| EPI_ISL_1169506, EPI_ISL_1169523                                                                                                                                         | Commonwealth Healthcare Center                                                                                                                    | Genomics and Discovery, Respiratory Viruses Branch, Division of Viral Diseases, Centers for Disease Control and Prevention                        | Krista Queen, Yan Li, Ying Tao, Jing Zhang, Anna Uehara, Anna Montmayeur, Clinton R. Paden, Peter W. Cook, Rachel Marine, Mili Sheth, Jasmine Padilla, Sarah Nobles, Mark Burroughs, Lori Rowe, Haibin Wang, Ben L. Rambo-Martin, Dhvani Batra, Justin Lee, Suxiang Tong                                                                                                                                                                                                 |
| EPI_ISL_1169903                                                                                                                                                          | Imelda Hospital                                                                                                                                   | Imelda Hospital                                                                                                                                   | Johan Frans, Dagmar Obbels, Hanne Valgaeren                                                                                                                                                                                                                                                                                                                                                                                                                              |
| EPI_ISL_1180774                                                                                                                                                          | Austrian Agency for Health and Food Safety (AGES)                                                                                                 | Bergthaler laboratory, CeMM Research Center for Molecular Medicine of the Austrian Academy of Sciences                                            | Lukas Endler, Anna Schedl, Fabian Amman, Thomas Penz, Benedikt Agerer, Maelle Le Moing, Michael Schuster, Bekir Erguner, Jan Laine, Martin Senekowitsch, Christoph Bock, Andreas Bergthaler                                                                                                                                                                                                                                                                              |
| EPI_ISL_1181725, EPI_ISL_1181742, EPI_ISL_1181752, EPI_ISL_1181763                                                                                                       | Microbiology and Virology Unit, Azienda Ospedale Padova, Padova, Italy                                                                            | Department of Molecular Medicine, Computational Medicine Group, Univeresity of Padova, Padova, Italy                                              | Elisa Franchin, Claudia Del Vecchio, Francesco Onelia, Stefano Toppo, Enrico Lavezzo, Laura Manuto, Federico Bianca, Marco Grazioli, Andrea Crisanti                                                                                                                                                                                                                                                                                                                     |
| EPI_ISL_1190956                                                                                                                                                          | West Tallinn Central Hospital laboratory                                                                                                          | 1. Laboratory of Communicable Diseases (Estonia); 2. Eurofins Genomics Europe Sequencing GmbH                                                     | Liidia Dotsenko et al.                                                                                                                                                                                                                                                                                                                                                                                                                                                   |
| EPI_ISL_1191784, EPI_ISL_1191820, EPI_ISL_1191824, EPI_ISL_1191827, EPI_ISL_1191828, EPI_ISL_1191831, EPI_ISL_1191832, EPI_ISL_1191959, EPI_ISL_1192022, EPI_ISL_1192030 | National Microbiology Reference Laboratory                                                                                                        | Quadram Institute Bioscience                                                                                                                      | Tapfumane Mashe, Faustinos T Takawira, Hlanai Gumbo, Kenneth K Maeka, Agnes Juru, Charles Nyagupe, Sekesai Zinyowera, Muchaneta Mugabe, Thanh Le Viet, Justin O'Grady, Gemma Kay, David Baker, Gaetan Thilliez, Ana-Victoria Gutiérrez, Robert Kingsley, Leonardo de Oliveira Martins, Andrew Tarupiwa, Andrew J. Page, Raiva Simbi                                                                                                                                      |
| EPI_ISL_1192280                                                                                                                                                          | Furst Medical Laboratory                                                                                                                          | Norwegian Institute of Public Health, Department of Virology                                                                                      | Kathrine Stene-Johansen, Kamilla Heddeland Instefjord, Hilde Elshaug, Garcia Llorente Ignacio, Engebretsen Serina Beate, Pedersen Benedikte Nevjen, Debech Nadia, Atiya R Ali, Marie Paulsen Madsen, Rasmus Riis Kopperud, Hilde Vollan, Karoline Bragstad, Olav Hungnes                                                                                                                                                                                                 |
| EPI_ISL_1196007                                                                                                                                                          | Mbabane Gov Hospital                                                                                                                              | National Institute for Communicable Diseases of the National Health Laboratory Service                                                            | Maphalala GP, Amoako DG, Scheepers C, Mohale T, Ntuli N, Mahlangu B, Ismail A, Bhiman JN                                                                                                                                                                                                                                                                                                                                                                                 |
| EPI_ISL_1201896                                                                                                                                                          | Diagnosticos da America - DASA                                                                                                                    | Instituto Adolfo Lutz, Interdisciplinary Procedures Center, Strategic Laboratory                                                                  | Claudio Tavares Sacchi, Claudia Regina Gonçalves, Erica Valessa Ramos Gomes, Karoline Rodrigues Campos, Caio Vinicius Dias Lopes                                                                                                                                                                                                                                                                                                                                         |
| EPI_ISL_1202050                                                                                                                                                          | Houston Methodist Hospital                                                                                                                        | Houston Methodist Hospital                                                                                                                        | S. Wesley Long, Randall J. Olsen, Paul A. Christensen, Sishir Subedi, Robert Olson, James J. Davis, Matthew Ojeda Saavedra, Prasanti Yerramilli, Layne Pruitt, Kristina Reppond, Madison N. Shyer, Jessica Cambic, Ilya J. Finkelstein, Jimmy Gollihar, and James M. Musser                                                                                                                                                                                              |
| EPI_ISL_1209407                                                                                                                                                          | Laboratory for HIV and opportunistic infections diagnosis The Republican Research and Practical Center for Epidemiology and Microbiology (RRPCEM) | Laboratory for HIV and opportunistic infections diagnosis The Republican Research and Practical Center for Epidemiology and Microbiology (RRPCEM) | Elena Gasich, Kirill Bulda, Artur Akhremchuk, Leonid Valentovich, Anatoly Krasko, Vladimir Gorbunov                                                                                                                                                                                                                                                                                                                                                                      |
| EPI_ISL_1215755                                                                                                                                                          | MVZ Labor Dr. Limbach & Kollegen GbR                                                                                                              | Robert Koch Institute                                                                                                                             | unknown                                                                                                                                                                                                                                                                                                                                                                                                                                                                  |
| EPI_ISL_1216127                                                                                                                                                          | MRCG at LSHTM Genomics lab                                                                                                                        | MRCG at LSHTM Genomics lab                                                                                                                        | Abdul Karim sesay, Abdoulie Kanteh, Jarra Manneh, Mariama Kujabi, Bakary Sanyang                                                                                                                                                                                                                                                                                                                                                                                         |
| EPI_ISL_1219203, EPI_ISL_1219542                                                                                                                                         | E. Gulbja laboratorija                                                                                                                            | Latvian Biomedical Research and Study Centre                                                                                                      | Janis Pjalkovskis, Nikita Zrelavs, Monta Ustinova, Ivars Silamikelis, Liga Birzniece, Kaspars Megnis, Una Krumina, Guntars Zarins, Vita Rovite, Lauma Freimane, Laila Silamikele, Laura Ansona, Davids Fridmanis, Mikus Gavars, Dmitrijs Perminovs, Jurijs Perevoscikovs, Uga Dumpis, Janis Kloivins                                                                                                                                                                     |

|                                                                                     |                                                                                                                                                |                                                                                                                             |                                                                                                                                                                                                                                                                                                                                                                                                                                                                                                                                                                                                                                                                                                                                                                                                                                                                                                                                                                                                                                |
|-------------------------------------------------------------------------------------|------------------------------------------------------------------------------------------------------------------------------------------------|-----------------------------------------------------------------------------------------------------------------------------|--------------------------------------------------------------------------------------------------------------------------------------------------------------------------------------------------------------------------------------------------------------------------------------------------------------------------------------------------------------------------------------------------------------------------------------------------------------------------------------------------------------------------------------------------------------------------------------------------------------------------------------------------------------------------------------------------------------------------------------------------------------------------------------------------------------------------------------------------------------------------------------------------------------------------------------------------------------------------------------------------------------------------------|
| EPI_ISL_1231556, EPI_ISL_1231567, EPI_ISL_1231620, EPI_ISL_1231734                  | National Center for Infectious and Parasitic Diseases (NCIPD)                                                                                  | National Center for Infectious and Parasitic Diseases (NCIPD)                                                               | Alexiev et al                                                                                                                                                                                                                                                                                                                                                                                                                                                                                                                                                                                                                                                                                                                                                                                                                                                                                                                                                                                                                  |
| EPI_ISL_1233526, EPI_ISL_1233560                                                    | National Center for Infectious and Parasitic Diseases (NCIPD)                                                                                  | National Center for Infectious and Parasitic Diseases (NCIPD)                                                               | Alexiev et al                                                                                                                                                                                                                                                                                                                                                                                                                                                                                                                                                                                                                                                                                                                                                                                                                                                                                                                                                                                                                  |
| EPI_ISL_1233825, EPI_ISL_1233832                                                    | Institute of Molecular and Translational Medicine / Laboratory of Experimental Medicine, Faculty of Medicine and Dentistry, Palacky University | Institute of Molecular and Translational Medicine / Laboratory of Experimental Medicine                                     | Rastislav Slavkovský, Hana Jaworek, Vladimíra Koudeláková, Marián Hajdúch                                                                                                                                                                                                                                                                                                                                                                                                                                                                                                                                                                                                                                                                                                                                                                                                                                                                                                                                                      |
| EPI_ISL_1240071, EPI_ISL_1240075                                                    | Clinical Center, University of Sarajevo; Unit for Clinical Microbiology                                                                        | Clinical Center, University of Sarajevo; Unit for Clinical Microbiology                                                     | Irma Salimovi-Beši, Amela Dedei-Ljubovi, Edina Zahirovi, Suzana Arapi, Sebjia Izetbegovi, Sandra Vegar-Zubovi                                                                                                                                                                                                                                                                                                                                                                                                                                                                                                                                                                                                                                                                                                                                                                                                                                                                                                                  |
| EPI_ISL_1250432, EPI_ISL_1250458                                                    | National Health Laboratory Service, South Africa                                                                                               | KRISP, KZN Research Innovation and Sequencing Platform                                                                      | Giandhari J, Pillay S, Maslo C, Sitharam L, Lessells R, Mdlalose K, York D, Khan S, Emmanuel SJ, Tegally H, Wilkinson E, de Oliveira T                                                                                                                                                                                                                                                                                                                                                                                                                                                                                                                                                                                                                                                                                                                                                                                                                                                                                         |
| EPI_ISL_1250695                                                                     | Wellington SCL (WN)                                                                                                                            | Institute of Environmental Science and Research (ESR)                                                                       | Rachel Boyle, SallyAnn Harbison, Olivia Stroeven, Xiaoyun Ren, Matt Storey, Nikki Freed, Muhammad Faisal, Jing Wang, Hermes Perez, Anja Werno, Antje van der Linden, Arlo Upton, Chris Mansell, David Hammer, Dragana Drinkovic, Gary McAuliffe, Hana Sofia Andersson, James Ussher, Jill Sherwood, Josh Freeman, Julia Howard, Juliet Elvy, Mary DeAlmeida, Matt Blakiston, Matthew Rogers, Max Bloomfield, Michael Addidge, Michelle Balm, Sally Roberts, Sarah Jefferies, Sharmini Mutaiyah, Susan Morpeth, Susan Taylor, Timothy Blackmore, Vani Sathyendran, Veronica Playle, Virginia Hope, Erasmus Smit, Lauren Jelly, Olin Silander, Joep de Ligt                                                                                                                                                                                                                                                                                                                                                                      |
| EPI_ISL_1250696                                                                     | Middlemore Hospital                                                                                                                            | Institute of Environmental Science and Research (ESR)                                                                       | Rachel Boyle, SallyAnn Harbison, Olivia Stroeven, Xiaoyun Ren, Matt Storey, Nikki Freed, Muhammad Faisal, Jing Wang, Hermes Perez, Anja Werno, Antje van der Linden, Arlo Upton, Chris Mansell, David Hammer, Dragana Drinkovic, Gary McAuliffe, Hana Sofia Andersson, James Ussher, Jill Sherwood, Josh Freeman, Julia Howard, Juliet Elvy, Mary DeAlmeida, Matt Blakiston, Matthew Rogers, Max Bloomfield, Michael Addidge, Michelle Balm, Sally Roberts, Sarah Jefferies, Sharmini Mutaiyah, Susan Morpeth, Susan Taylor, Timothy Blackmore, Vani Sathyendran, Veronica Playle, Virginia Hope, Erasmus Smit, Lauren Jelly, Olin Silander, Joep de Ligt                                                                                                                                                                                                                                                                                                                                                                      |
| EPI_ISL_1255139, EPI_ISL_1255140, EPI_ISL_1255154, EPI_ISL_1255194, EPI_ISL_1255273 | West African Centre for Cell Biology of Infectious Pathogens (WACCBIP), University of Ghana, Accra, Ghana                                      | West African Centre for Cell Biology of Infectious Pathogens (WACCBIP), University of Ghana, Volta Road, Legon-Accra, Ghana | Collins M. Morang'a, Joyce M. Ngoi, Evelyn B. Quansah, Samirah Saidi, Dominic S.Y. Amuzu, Vincent Appiah, Philip M. Soglo, Vanessa Magnussen, Aisha Mohammed, Kesego Tapela, Nelson Kibenge, Abdoulaye B Diallo, Frederick Kumi-Ansah, Theophilus Odoom, Oliver D Boakye5, Emmanuelella Amoak04, Abdul-Karim Abass, Samuel Kaba Akoriyea, Frederick Tei-Maya, Lucas N. Amenga-Etego, Dam Kenneth Mibut, Yaw Bediako, Benjamin Demah Nuerter, Gordon A Awandare, Peter K Quashie, Gordon A Awandare, Yaw Bediako                                                                                                                                                                                                                                                                                                                                                                                                                                                                                                                |
| EPI_ISL_1259063                                                                     | Synlab Eesti OÜ                                                                                                                                | 1. Laboratory of Communicable Diseases (Estonia); 2. Eurofins Genomics Europe Sequencing GmbH                               | Lidia Dotsenko et al.                                                                                                                                                                                                                                                                                                                                                                                                                                                                                                                                                                                                                                                                                                                                                                                                                                                                                                                                                                                                          |
| EPI_ISL_1261423                                                                     | National Institute of Public Health                                                                                                            | National Reference Laboratory for Influenza and Respiratory Viruses CZE                                                     | Helena Jirincova, Jaromira Vecerova, Timotej Suri, Dusan Trnka, Alexander Nagy                                                                                                                                                                                                                                                                                                                                                                                                                                                                                                                                                                                                                                                                                                                                                                                                                                                                                                                                                 |
| EPI_ISL_1262889                                                                     | Labo Analyses Med                                                                                                                              | National Reference Center for Viruses of Respiratory Infections, Institut Pasteur, Paris                                    | Marion Barbet, Sylvie Behillil, Méline Bizard, Angela Brisebarre, Camille Capel, Etienne Simon-Lorière, Vincent Enouf, Maud Vanpeene, Sylvie van der Werf, Felloni Claire                                                                                                                                                                                                                                                                                                                                                                                                                                                                                                                                                                                                                                                                                                                                                                                                                                                      |
| EPI_ISL_1268664                                                                     | Hannover Medical School, Institute of Virology                                                                                                 | Hannover Medical School, Institute of Virology                                                                              | Lars Steinbrück                                                                                                                                                                                                                                                                                                                                                                                                                                                                                                                                                                                                                                                                                                                                                                                                                                                                                                                                                                                                                |
| EPI_ISL_1272125                                                                     | Ministry of Health Turkey                                                                                                                      | Ministry of Health Turkey                                                                                                   | Fatma Bayraktar, Yasemin Cosgun, Suleyman Yalcin, Gulay Korukluoglu                                                                                                                                                                                                                                                                                                                                                                                                                                                                                                                                                                                                                                                                                                                                                                                                                                                                                                                                                            |
| EPI_ISL_1273214                                                                     | Oxford University Clinical Research Unit (OUCRU)                                                                                               | Oxford University Clinical Research Unit (OUCRU)                                                                            | Nguyen Van Vinh Chau, Nguyen Thi Thu Hong, Nghiem My Ngoc, Nguyen To Anh, Huynh Trung Trieu, Le Nguyen Truc Nhu, Lam Minh Yen, Ngo Ngoc Quang Minh, Nguyen Thanh Phong, Nguyen Thanh Trung, le Thi Thu Huong, Tran Nguyen Hoang Tu, Le Manh Hung, Tran Tan Thanh, Nguyen Thanh Dung, Nguyen Tri Dung, Guy Thwaites, Le Van Tan                                                                                                                                                                                                                                                                                                                                                                                                                                                                                                                                                                                                                                                                                                 |
| EPI_ISL_1276733                                                                     | Lighthouse Lab in Glasgow                                                                                                                      | Wellcome Sanger Institute for the COVID-19 Genomics UK (COG-UK) Consortium                                                  | Harper VanSteenhouse, Yumi Kasai, David Gray, Carol Clugston, Anna Dominiczak and Alex Alderton, Roberto Amato, Jeffrey Barrett, Sonia Goncalves, Ewan Harrison, David K. Jackson, Ian Johnston, Dominic Kwiatkowski, Cordelia Langford, John Sillitoe on behalf of the Wellcome Sanger Institute COVID-19 Surveillance Team                                                                                                                                                                                                                                                                                                                                                                                                                                                                                                                                                                                                                                                                                                   |
| EPI_ISL_1278103                                                                     | NL-Dr. Leonard A. Miller Centre for Health Services                                                                                            | National Microbiology Laboratory (NML)                                                                                      | Anna Majer, Shari Tyson, Grace Seo, Philip Mabon, Elsie Grudeski, Rhiannon Huzarewich, Russell Mandes, Anneliese Landgraaf, Jennifer Tanner, Natalie Knox, Morag Graham, Gary Van Domselaar, Robert Needle, Yang Yu, Adel Malek, Laura Gilbert, George Zahariadis, Nathalie Bastien, Yan Li, Timothy Booth, Darian Hole, Madison Chapel, Kirsten Biggar, Kerri Smith, CanCOGeN's metadata curation team, Public Health Agency of Canada CanCOGeN team                                                                                                                                                                                                                                                                                                                                                                                                                                                                                                                                                                          |
| EPI_ISL_1279172                                                                     | Department of Virology and Immunology, University of Helsinki and Helsinki University Hospital, HUSLAB Finland                                 | Department of Virology, Faculty of Medicine, University of Helsinki, Helsinki, Finland                                      | Teemu Smura, Ravi Kant, Phuoc Truong, Hussein Alburkat, Hannimari Kallio-Kokko, Jenni Virtanen, Maija Suanto, Essi Korhonen, Sari Hannula, Harri Kangas, Hanna Liimatainen, Satu Kerkela, Hanna Jarva, Maija Lappalainen, Pekka Elonen, Olli Vapalahti                                                                                                                                                                                                                                                                                                                                                                                                                                                                                                                                                                                                                                                                                                                                                                         |
| EPI_ISL_1279266                                                                     | Centro de Investigación Biomédica del Noreste (CIBIN)                                                                                          | Instituto Nacional de Enfermedades Respiratorias (INER): Centro de Investigación en Enfermedades Infecciosas (CIENI)        | Consortio Mexicano de Vigilancia Genómica (CoViGen-Mex). Authors (in alphabetical order): Julio Elias Alvarado-Yaah, Carlos F. Arias, Santiago Ávila-Ríos, Víctor Hugo Borja-Aburto, Celia Boukadida, Juan Bautista Chale-Dzul, José Antonio Enciso-Moreno, Gloria Elena Espinoza-Ayala, Fernando Fontove-Herrera, Concepción Grajales-Muñiz, Ricardo Grande, Alfredo Herrera-Estrella, Carla Ivón Herrera-Najera, Pavel Isa, Brenda Irasema Maldonado-Meza, Bernardo Martínez-Miguel, Margarita Matías-Florentino, María Guadalupe de Jesús Mireles-Rivera, Gloria María Molina-Salinas, Hector Montoya-Fuentes, José Esteban Muñoz-Medina, José de Jesús Nuñez-Contreras, Alicia Ocaña-Mondragón, Luis Alberto Ochoa-Carrera, Hector Esteban Paz-Juárez, Francisco Pulido, Helen Haydee Fernanda Ramirez-Plascencia, Angel Gustavo Salas-Lais, Jorge Ivan Salinal-Navarez, Alejandro Sanchez-Flores, Clara Esperanza Santacruz-Tinoco, María Guadalupe Santiago-Mauricio, Nelly Sélem-Mojica, Blanca Taboada, Gloria Vazquez |
| EPI_ISL_1279950                                                                     | National Institute of Infectious Diseases-Prof. Dr. Matei Bals Molecular Diagnostics Laboratory                                                | National Institute of Infectious Diseases-Prof. Dr. Matei Bals Molecular Diagnostics Laboratory                             | Leontina Banica, Marius Surleac, Corina Casangiu, Petre Milu, Andreea Tudor, Simona Paraschiv, Dan Otelea                                                                                                                                                                                                                                                                                                                                                                                                                                                                                                                                                                                                                                                                                                                                                                                                                                                                                                                      |
| EPI_ISL_1280136                                                                     | Department of Genetics, Medirex                                                                                                                | Laboratory of Genomics and Bioinformatics, Comenius University Science Park                                                 | Tatiana Sedláková, Miroslav Böhmer, Renáta Lukáková, Gabriel Minárik, Anna Giová, Werner Krampfl, Diana Rusáková, Jaroslav Budíš, Tomáš Szemes                                                                                                                                                                                                                                                                                                                                                                                                                                                                                                                                                                                                                                                                                                                                                                                                                                                                                 |
| EPI_ISL_1287762                                                                     | Unidad de Investigación Biomédica de Zacatecas (UIBZ)                                                                                          | Instituto Nacional de Enfermedades Respiratorias (INER): Centro de Investigación en Enfermedades Infecciosas (CIENI)        | Consortio Mexicano de Vigilancia Genómica (CoViGen-Mex). Authors (in alphabetical order): Julio Elias Alvarado-Yaah, Carlos F. Arias, Santiago Ávila-Ríos, Víctor Hugo Borja-Aburto, Celia Boukadida, Juan Bautista Chale-Dzul, José Antonio Enciso-Moreno, Gloria Elena Espinoza-Ayala, Fernando Fontove-Herrera, Concepción Grajales-Muñiz, Ricardo Grande, Alfredo Herrera-Estrella, Carla Ivón Herrera-Najera, Pavel Isa, Brenda Irasema Maldonado-Meza, Bernardo Martínez-Miguel, Margarita Matías-Florentino, María Guadalupe de Jesús Mireles-Rivera, Gloria María Molina-Salinas, Hector Montoya-Fuentes, José Esteban Muñoz-Medina, José de Jesús Nuñez-Contreras, Alicia Ocaña-Mondragón, Luis Alberto Ochoa-Carrera, Hector Esteban Paz-Juárez, Francisco Pulido, Helen Haydee Fernanda Ramirez-Plascencia, Angel Gustavo Salas-Lais, Jorge Ivan Salinal-Navarez, Alejandro Sanchez-Flores, Clara Esperanza Santacruz-Tinoco, María Guadalupe Santiago-Mauricio, Nelly Sélem-Mojica, Blanca Taboada, Gloria Vazquez |
| EPI_ISL_1293353                                                                     | OLVZ Aalst                                                                                                                                     | OLVZ Aalst                                                                                                                  | Astrid Holderbeke                                                                                                                                                                                                                                                                                                                                                                                                                                                                                                                                                                                                                                                                                                                                                                                                                                                                                                                                                                                                              |
| EPI_ISL_1300646                                                                     | Cantonal Hospital Zenica; Department of Microbiological Diagnostics                                                                            | Clinical Center, University of Sarajevo; Unit for Clinical Microbiology                                                     | Irma Salimovi-Beši, Amela Dedei-Ljubovi, Edina Zahirovi, Suzana Arapi, Sebjia Izetbegovi, Sandra Vegar-Zubovi, Maja Kuzmanovska, Golubinka Boshevska                                                                                                                                                                                                                                                                                                                                                                                                                                                                                                                                                                                                                                                                                                                                                                                                                                                                           |
| EPI_ISL_1301745                                                                     | Nucleic Acid Testing, National Reference Laboratory                                                                                            | GIGA Medical Genomics                                                                                                       | Yvan Butera, Keith Durkin, Maria Artesi, Bouchra Boujemla, Robert Rutayisire, Patrick Tuyisenge, Esperence Umumararungu, Sébastien Bontems, Marie-Pierre Hayette, Nathalie Renotte, Swaibu Gatara, Jacob Souopgui, Sabin Nsanzimana, Vincent Bours, Léon Mutesa                                                                                                                                                                                                                                                                                                                                                                                                                                                                                                                                                                                                                                                                                                                                                                |
| EPI_ISL_1301938                                                                     | hopital                                                                                                                                        | National Reference Center for Viruses of Respiratory Infections, Institut Pasteur, Paris                                    | Marion Barbet, Sylvie Behillil, Méline Bizard, Angela Brisebarre, Camille Capel, Louise Lefrançois, Etienne Simon-Lorière, Vincent Enouf, Maud Vanpeene, Sylvie van der Werf, Leruez-Ville Marianne                                                                                                                                                                                                                                                                                                                                                                                                                                                                                                                                                                                                                                                                                                                                                                                                                            |
| EPI_ISL_1302076                                                                     | National Center of Infectious and Parasitic Diseases                                                                                           | National Center of Infectious and Parasitic Diseases                                                                        | Alexiev et al                                                                                                                                                                                                                                                                                                                                                                                                                                                                                                                                                                                                                                                                                                                                                                                                                                                                                                                                                                                                                  |
| EPI_ISL_1302180                                                                     | Instituto Nacional de Enfermedades Respiratorias (INER)                                                                                        | Instituto de Biotecnología de la UNAM                                                                                       | Authors from IBT, IMSS, INdRE and INER (in alphabetical order): Carlos F. Arias, Santiago Ávila-Ríos, Gisela Barrera-Badillo, Eduardo Becerril-Vargas, Celia Boukadida, Natividad Cruz-Ortiz, Larissa Fernandes-Matano, Ricardo Grande, Lucia Hernandez-Rivas, Alejandra Hernández-Terán, Pavel Isa, Irma Lopez-Martinez, José Arturo Martínez-Orozco, Margarita Matías-Florentino, Fidencio Mejía-Nepomuceno, Edgar Mendieta-Condado, Mario Mujica-Sánchez,                                                                                                                                                                                                                                                                                                                                                                                                                                                                                                                                                                   |

|                                                                                                      |                                                                                                                                                                                                                |                                                                                                                                                                                                       |                                                                                                                                                                                                                                                                                                                                                                                                                                                                                                                                                                                                                                                             |
|------------------------------------------------------------------------------------------------------|----------------------------------------------------------------------------------------------------------------------------------------------------------------------------------------------------------------|-------------------------------------------------------------------------------------------------------------------------------------------------------------------------------------------------------|-------------------------------------------------------------------------------------------------------------------------------------------------------------------------------------------------------------------------------------------------------------------------------------------------------------------------------------------------------------------------------------------------------------------------------------------------------------------------------------------------------------------------------------------------------------------------------------------------------------------------------------------------------------|
| EPI_ISL_1302798, EPI_ISL_1302831, EPI_ISL_1302881                                                    | ADMED Microbiologie                                                                                                                                                                                            | Genomics and Transcriptomics, Philip Morris International                                                                                                                                             | José Esteban Muñoz-Medina, Tatiana Nunez-Garcia, Luis Alberto Ochoa-Carrera, Hector Esteban Paz-Juárez, Francisco Pulido, José Ernesto Ramírez-González, Alma Rincón-Rubio, Teresita Rojas-Mendoza, Jorge Salas-Hernández, Alejandro Sanchez-Flores, Clara Esperanza Santacruz-Tinoco, Andrea Santos Coy-Arechavaleta, Blanca Taboada, Gloria Vazquez, Joel Armando Vázquez-Pérez, Jerome Jean Verleyen                                                                                                                                                                                                                                                     |
| EPI_ISL_1306217                                                                                      | Department of Laboratory Medicine, Clinical Center, National Institutes of Health                                                                                                                              | Laboratory of Parasitic Diseases, Systems Genomics Section, National Institute of Allergy and Infectious Diseases, National Institutes of Health                                                      | Reto Lienhard, Marie-Lise Tritten, Emmanuel Guedj, Nicolas Sierro, Rémi Dulize, David Bornand, Mehdi Auberson, Maxime Berthouzz, Nikolai Ivanov, Manuel Peitsch                                                                                                                                                                                                                                                                                                                                                                                                                                                                                             |
| EPI_ISL_1312537                                                                                      | Centrālā laboratorija                                                                                                                                                                                          | Latvian Biomedical Research and Study Centre                                                                                                                                                          | Allison Roder, Stephanie Banakis, Matthew Chung, Jung-ho Youn, Rachel Mercado, Wei Wang, Tara Palmore, Michael Bell, Heike Bailin, Jessica McCormick-Ell, Sanchita Das, Jennifer Kwan, Elodie Ghedin                                                                                                                                                                                                                                                                                                                                                                                                                                                        |
| EPI_ISL_1312592                                                                                      | E. Gulbjā laboratorija                                                                                                                                                                                         | Latvian Biomedical Research and Study Centre                                                                                                                                                          | Janis Pjalkovskis, Nikita Zrelavs, Monta Ustinova, Davids Silamikelis, Liga Birzniece, Kaspars Megnis, Una Krumina, Guntars Zarins, Vita Rovite, Lauma Freimane, Laila Silamikele, Laura Ansonē, Davids Fridmanis, Marta Priedite, Jana Osīte, Jurijs Perevoscikovs, Uga Dumpis, Janis Klovinis                                                                                                                                                                                                                                                                                                                                                             |
| EPI_ISL_1315314                                                                                      | LabPLUS                                                                                                                                                                                                        | Institute of Environmental Science and Research (ESR)                                                                                                                                                 | Janis Pjalkovskis, Nikita Zrelavs, Monta Ustinova, Davids Silamikelis, Liga Birzniece, Kaspars Megnis, Una Krumina, Guntars Zarins, Vita Rovite, Lauma Freimane, Laila Silamikele, Laura Ansonē, Davids Fridmanis, Mikus Gavars, Dmitrijs Perminovs, Jurijs Perevoscikovs, Uga Dumpis, Janis Klovinis                                                                                                                                                                                                                                                                                                                                                       |
| EPI_ISL_1319258, EPI_ISL_1319270                                                                     | Synlab Eesti OÜ                                                                                                                                                                                                | 1. Laboratory of Communicable Diseases (Estonia); 2. Eurofins Genomics Europe Sequencing GmbH                                                                                                         | Rachel Boyle, SallyAnn Harbison, Olivia Stroeven, Xiaoyun Ren, Matt Storey, Nikki Freed, Muhammad Faisal, Jing Wang, Hermes Perez, Anja Werno, Antje van der Linden, Arlo Upton, Chris Mansell, David Hammer, Dragana Drinkovic, Gary McAluliffe, Hana Sofia Andersson, James Ussher, Jill Sherwood, Josh Freeman, Julia Howard, Juliet Elvy, Mary DeAlmeida, Matt Blakiston, Matthew Rogers, Max Bloomfield, Michael Addidle, Michelle Balm, Sally Roberts, Sarah Jefferies, Sharmini Muttaiyah, Susan Morpeth, Susan Taylor, Timothy Blackmore, Vani Sathyendran, Veronica Playle, Virginia Hope, Erasmus Smit, Lauren Jelly, Olin Silander, Joep de Ligt |
| EPI_ISL_1322142                                                                                      | Microbiology Department, Laboratori Clínic Metropolitana Nord. Hospital Universitari Germans Trias i Pujol.                                                                                                    | Can Ruti SARS-CoV-2 Sequencing Hub (HUGTIP/IrsiCaixa/IGTP)                                                                                                                                            | Lidia Dotsenko et al.                                                                                                                                                                                                                                                                                                                                                                                                                                                                                                                                                                                                                                       |
| EPI_ISL_1322388                                                                                      | LAM SYNLAB BORDEAUX ATLANTIQUE                                                                                                                                                                                 | CNR Virus des Infections Respiratoires - France SUD                                                                                                                                                   | Marc Noguera-Julian, Pilar Armengol, Ignacio Blanco, Antoni E Bordoy, Francesc Catala-Moll, Pere-Joan Cardona, Julia G Prado, Carol Galvez Maria Casadellà, Cristina Casañ, Gemma Clara, Irina Pey, Jordi Barretina, Bonaventura Clotet, Cristina Esteban, Montserrat Giménez, Mercedes Guerrero, Anna Not, Roger Paredes, Mariona Parera, Verónica Saludes, Alba Sánchez, and Elisa Marró on behalf of the Can Ruti SARS-CoV-2 Sequencing Hub.                                                                                                                                                                                                             |
| EPI_ISL_1340752                                                                                      | Departamento de Virología, Laboratorio Central de Salud Pública, Avenida Venezuela y Teniente Escurra, Asunción, Paraguay                                                                                      | Laboratory of Respiratory Viruses and Measles, Oswaldo Cruz Institute, FIOCRUZ                                                                                                                        | Antonin Bal, Gregory Destras, Gwendolyne Burfin, Hadrien Regue, Quentin Semanas, Martine Valette, Bruno Lina, Laurence Josset                                                                                                                                                                                                                                                                                                                                                                                                                                                                                                                               |
| EPI_ISL_1346626                                                                                      | Center of Excellence in Clinical Virology                                                                                                                                                                      | Research Unit of Systems Microbiology                                                                                                                                                                 | Paola Resende, Cynthia Vazquez, Luciana Apollinaro, Fernando Motta, Anna Carolina Paixao, Ana Carolina Mendonca, Alice Sampaio Rocha, Renata Serrano Lopes, Marilda Siqueira on behalf of the Fiocruz COVID-19 Genomic Surveillance Network                                                                                                                                                                                                                                                                                                                                                                                                                 |
| EPI_ISL_1348045                                                                                      | SYNLAB MVZ Leinfelden-Echterdingen                                                                                                                                                                             | Robert Koch Institute                                                                                                                                                                                 | Jiratchaya Puenpa, Pattaraporn Nimsamer, Oraphan Mayuramart, Vorthon Sawaswong, Sunchai Payungporn, Anek Mungaomklang, Ritthideach Yorsaeng, Jira Chansaenroj, Kamolthip Atsawaranunt, Vichan Pawan, Suwannana Petto, Amornwan Kongklieng, Pakkapon Panwijitkul, Yong Poovowan                                                                                                                                                                                                                                                                                                                                                                              |
| EPI_ISL_1349024                                                                                      | Bayerisches Landesamt für Gesundheit und Lebensmittelsicherheit (LGL)                                                                                                                                          | Robert Koch Institute                                                                                                                                                                                 | unknown                                                                                                                                                                                                                                                                                                                                                                                                                                                                                                                                                                                                                                                     |
| EPI_ISL_1360051                                                                                      | Klinisch Laboratorium ZNA                                                                                                                                                                                      | Klinisch Laboratorium ZNA                                                                                                                                                                             | unknown                                                                                                                                                                                                                                                                                                                                                                                                                                                                                                                                                                                                                                                     |
| EPI_ISL_1363117                                                                                      | Molecular diagnostic laboratory of Federal Budget Institution of Science "Central Research Institute of Epidemiology" of The Federal Service on Customers' Rights Protection and Human Well-being Surveillance | Group of Genomics and Postgenomic Technologies of Central Research Institute of Epidemiology                                                                                                          | Verstrepen et al.                                                                                                                                                                                                                                                                                                                                                                                                                                                                                                                                                                                                                                           |
| EPI_ISL_1371781                                                                                      | DYOMEDEA-LABORATOIRE DE LA SAUVEGARDE                                                                                                                                                                          | CNR Virus des Infections Respiratoires - France SUD                                                                                                                                                   | Samoilov AE, Kaptelova VV, Korneenko EV, Valdokhina AV, Bulanenko VP, Saenko SS, Golubeva AG, Zotova MI, Berlina YY, Solovyeva ED, Shipulina OY, Speranskaya AS, Tivanova EV, Kondrasheva LY, Akimkin VG, Cherkashina AS                                                                                                                                                                                                                                                                                                                                                                                                                                    |
| EPI_ISL_1372342                                                                                      | HELIX LLC                                                                                                                                                                                                      | WHO National Influenza Centre Russian Federation                                                                                                                                                      | Antonin Bal, Gregory Destras, Gwendolyne Burfin, Hadrien Regue, Quentin Semanas, Martine Valette, Bruno Lina, Laurence Josset                                                                                                                                                                                                                                                                                                                                                                                                                                                                                                                               |
| EPI_ISL_1373603, EPI_ISL_1373608, EPI_ISL_1373619, EPI_ISL_1373623, EPI_ISL_1373632, EPI_ISL_1373656 | UPMC Clinical Microbiology Laboratory                                                                                                                                                                          | Microbial Genome Sequencing Center; Microbial Genomic Epidemiology Laboratory, University of Pittsburgh                                                                                               | Andrey Komissarov, Artem Fadeev, Anna Ivanova, Kseniya Komissarova, Dmitry Bazhenov, Tamila Musaeva, Maria Timofeeva, Veronika Eder, Maria Pisareva, Daria Danilenko, Ksenia Safina, Georgii Bazykin, Dmitry Lioznov                                                                                                                                                                                                                                                                                                                                                                                                                                        |
| EPI_ISL_1379509                                                                                      | Tampa General Hospital Esoteric Lab                                                                                                                                                                            | Tampa General Hospital Esoteric Research & Development Lab                                                                                                                                            | Lee H. Harrison, Jane W. Marsh, Marissa P. Griffith, Stephanie L. Mitchell, Vatsala R. Srinivasa, Kady D. Waggle, Daniel J. Snyder, Vaughn S. Cooper                                                                                                                                                                                                                                                                                                                                                                                                                                                                                                        |
| EPI_ISL_1380161, EPI_ISL_1380225                                                                     | CSIR-Centre for Cellular and Molecular Biology                                                                                                                                                                 | CSIR-Centre for Cellular and Molecular Biology-INSACOG                                                                                                                                                | Grant Vestal, Deanna Becker, Dominic Uy, Vicki Healer, Amorce Lima, Suzane Silbert                                                                                                                                                                                                                                                                                                                                                                                                                                                                                                                                                                          |
| EPI_ISL_1381365                                                                                      | Laboratory for Respiratory Viruses, Cantacuzino National Military-Medical Institute for Research and Development                                                                                               | Cantacuzino Institute Virology                                                                                                                                                                        | Payel Mukherjee, Pratheusa Maccha, Namami Gaur, Lamuk Zaveri, Tulasi Nagabandi, Purushotham Vodnala, Blessy B John, Viswagithe S L, B Himarsi, Sofia Banu, Priya Singh, Archana Bharadwaj Siva, Karthik Bharadwaj Tallapaka, Rakesh K Mishra, Divya Tej Sowpati                                                                                                                                                                                                                                                                                                                                                                                             |
| EPI_ISL_1391065                                                                                      | Ospedale Santa Caterina Novella                                                                                                                                                                                | Istituto Zooprofilattico Sperimentale della Puglia e della Basilicata                                                                                                                                 | Luiza Ustean, Nicoleta Paraschiv, Catalina Pascu, Sorin Dinu, Mihaela Lazar                                                                                                                                                                                                                                                                                                                                                                                                                                                                                                                                                                                 |
| EPI_ISL_1392683, EPI_ISL_1392684                                                                     | USCA Tagliacozzo TAGLIACOZZO(L'AQUILA)                                                                                                                                                                         | Istituto Zooprofilattico Sperimentale dell'Abruzzo e Molise "G. Caporale"                                                                                                                             | Parisi A., Bianco A., Capozzi L., Del Sambro L., Simone D., Difato L., Bruno A. R.                                                                                                                                                                                                                                                                                                                                                                                                                                                                                                                                                                          |
| EPI_ISL_1392687                                                                                      | USCA Pescina PESCINA(L'AQUILA)                                                                                                                                                                                 | Istituto Zooprofilattico Sperimentale dell'Abruzzo e Molise "G. Caporale"                                                                                                                             | Lorusso A, Marcacci M, Di Domenico M, Ancora M, Curini V, Di Lollo Valeria, Mangone I, Rinaldi A, Delli Compagni E, Scialabba S, Caporale M, Di Pasquale A, Cammà C, Puglia I, Calistri P, Savini G                                                                                                                                                                                                                                                                                                                                                                                                                                                         |
| EPI_ISL_1393763                                                                                      | Laboratorum Epidemiologii WSSE w Szczecinie                                                                                                                                                                    | 1. National Institute of Public Health - National Institute of Hygiene; 2. Eurofins Genomics Europe Sequencing GmbH                                                                                   | Lorusso A, Marcacci M, Di Domenico M, Ancora M, Curini V, Di Lollo Valeria, Mangone I, Rinaldi A, Delli Compagni E, Scialabba S, Caporale M, Di Pasquale A, Cammà C, Puglia I, Calistri P, Savini G                                                                                                                                                                                                                                                                                                                                                                                                                                                         |
| EPI_ISL_1393833                                                                                      | Laboratorium Medyczne LAB-MED                                                                                                                                                                                  | 1. National Institute of Public Health - National Institute of Hygiene; 2. Eurofins Genomics Europe Sequencing GmbH                                                                                   | Wokowicz Tomasz, Zacharczuk Katarzyna, Sadkowska-Todys Magorzata, Gierczyki Rafa, Eurofins Genomics Europe Sequencing Team, ECDC COVID-19 WGS support team                                                                                                                                                                                                                                                                                                                                                                                                                                                                                                  |
| EPI_ISL_1393885                                                                                      | WSSE Laboratorium Mikrobiologii i Parazytologii                                                                                                                                                                | 1. National Institute of Public Health - National Institute of Hygiene; 2. Eurofins Genomics Europe Sequencing GmbH                                                                                   | Wokowicz Tomasz, Zacharczuk Katarzyna, Sadkowska-Todys Magorzata, Gierczyki Rafa, Eurofins Genomics Europe Sequencing Team, ECDC COVID-19 WGS support team                                                                                                                                                                                                                                                                                                                                                                                                                                                                                                  |
| EPI_ISL_1393952                                                                                      | WSSE w Krakowie                                                                                                                                                                                                | 1. National Institute of Public Health - National Institute of Hygiene; 2. Eurofins Genomics Europe Sequencing GmbH                                                                                   | Wokowicz Tomasz, Zacharczuk Katarzyna, Sadkowska-Todys Magorzata, Gierczyki Rafa, Eurofins Genomics Europe Sequencing Team, ECDC COVID-19 WGS support team                                                                                                                                                                                                                                                                                                                                                                                                                                                                                                  |
| EPI_ISL_1394298                                                                                      | Hospital for Infectious Diseases, Molecular Diagnostics Laboratory, Warsaw, Poland                                                                                                                             | 1. Virogenetics Laboratory of Virology, Maopolska Centre of Biotechnology, Jagiellonian University, 2. Intercollegiate Faculty of Biotechnology University of Gdansk and Medical University of Gdansk | Lukasz Rabalski, Maciej Kosinski, Natalia Mazur-Panasuk, Aneta Kopacz, Piotr Zabek, Tomasz Dyda, Andrzej Horban, Krzysztof Pyrc, Krystyna Bienkowska-Szewczyk                                                                                                                                                                                                                                                                                                                                                                                                                                                                                               |
| EPI_ISL_1395828                                                                                      | Inmunología del Hospital Perrando e Instituto de Medicina Regional de la UNNE                                                                                                                                  | Grupo de Genómica y Bioinformática del Instituto de Investigación de la Cadena Láctea CONICET-INTA on behalf of 'Proyecto Argentino Interinstitucional de genómica de SARS-CoV-2' (PAIS Consortium)   | María Delia Foussal, Gerardo Deluca, Natalia Andrea Ayala, María Verónica Gómez, Gustavo Giusiano, Horacio Lucero, Marcelo Marín, Antonieta Cayré, Laura Lescano, Eberhardt, MF, Irazoqui, Amadio, AF                                                                                                                                                                                                                                                                                                                                                                                                                                                       |
| EPI_ISL_1395940, EPI_ISL_1395952, EPI_ISL_1395955                                                    | Laboratorio Central de Salud Pública                                                                                                                                                                           | Grupo de Genómica y Bioinformática del Instituto de Investigación de la Cadena Láctea CONICET-INTA on behalf of 'Proyecto Argentino Interinstitucional de genómica de                                 | Natalia Andrea Ayala y María Verónica Gómez, Erica Struss, Esteban Paredes, Antonieta Cayré, Laura Lescano, Eberhardt, MF, Irazoqui, Amadio, AF                                                                                                                                                                                                                                                                                                                                                                                                                                                                                                             |

| SARS-CoV-2' (PAIS Consortium)                                                                        |                                                                                                                                                                                                                |                                                                                                                                                     |                                                                                                                                                                                                                                                                                                                                                                                                                                                                                                                                                                                                                                                           |
|------------------------------------------------------------------------------------------------------|----------------------------------------------------------------------------------------------------------------------------------------------------------------------------------------------------------------|-----------------------------------------------------------------------------------------------------------------------------------------------------|-----------------------------------------------------------------------------------------------------------------------------------------------------------------------------------------------------------------------------------------------------------------------------------------------------------------------------------------------------------------------------------------------------------------------------------------------------------------------------------------------------------------------------------------------------------------------------------------------------------------------------------------------------------|
| EPI_ISL_1396412                                                                                      | Centro de Tecnología en Salud Pública de la Universidad Nacional de Rosario                                                                                                                                    | Laboratorio Mixto de Biotecnología Acuática (LMBA) on behalf of 'Proyecto Argentino Interinstitucional de genómica de SARS-CoV-2' (PAIS Consortium) | Joaquín Ezpeleta, Ignacio García Labari, Victoria Posner, Vanina Villanova, Pablo Casal, Pilar Bulacio, Sofía Lavista Llanos, Federico Remes Lenicov, Ana Paletta, Leandro Ciappina, Flavio Spetale, Agustina Cerri, Silvana Spinelli, Elisa Bolatti, Diego Chouhy, María Re, Gastón Viarengo, Ana Cavatorta, Julian Acosta, Javier Murillo, Laura Angelone, Adriana Giri, Silvia Arranz, Elizabeth Tapia (argenTAG)                                                                                                                                                                                                                                      |
| EPI_ISL_1401300, EPI_ISL_1401386                                                                     | National Center of Infectious and Parasitic Diseases                                                                                                                                                           | National Center of Infectious and Parasitic Diseases                                                                                                | Alexiev et al                                                                                                                                                                                                                                                                                                                                                                                                                                                                                                                                                                                                                                             |
| EPI_ISL_1403142                                                                                      | Laboratoire de santé publique du Québec                                                                                                                                                                        | Laboratoire de santé publique du Québec                                                                                                             | Sandrine Moreira, Ioannis Ragoussis, Guillaume Bourque, Jesse Shapiro, Mark Lathrop and Michel Roger on behalf of the CoVSeQ research group (http://covseq.ca/researchgroup)                                                                                                                                                                                                                                                                                                                                                                                                                                                                              |
| EPI_ISL_1407115, EPI_ISL_1407116                                                                     | National HIV Reference Laboratory, Ministry of Health, Public Health Institute of Malawi                                                                                                                       | KRISP, KZN Research Innovation and Sequencing Platform                                                                                              | Mvula B, Chilima B, Chiwaula M, Mwangomba W, Panja L, Kasambara W, Auld A, Kim L, Kampira E, Kaba M, Wadonda N, Maida A, Giandhari J, Pillay S, Naidoo Y, Lessells R, Emmanuel SJ, Tegally H, Wilkinson E, de Oliveira T                                                                                                                                                                                                                                                                                                                                                                                                                                  |
| EPI_ISL_1416191                                                                                      | Fakultas Kedokteran Universitas Sumatera Utara                                                                                                                                                                 | National Institute of Health Research and Development                                                                                               | Vivi Setiawaty, Hana Aparsi Pawestri, Subangkit, Kartika Dewi Puspa, Arie Ardiansyah Nugraha, Hartanti Dian Ikwati, Nelly Puspandari, Krisna Nur Andriana Pangesti                                                                                                                                                                                                                                                                                                                                                                                                                                                                                        |
| EPI_ISL_1419200, EPI_ISL_1419330, EPI_ISL_1419340, EPI_ISL_1419595                                   | INSACOG-WB                                                                                                                                                                                                     | National Institute of Biomedical Genomics - INSACOG                                                                                                 | Arindam Maitra, Bhaswati Bandyopadhyay, Nidhan Kumar Biswas, Tamal Ghosh, Sreedhar Chinnaswamy, Ajay Chakraborti, Saumitra Das                                                                                                                                                                                                                                                                                                                                                                                                                                                                                                                            |
| EPI_ISL_1439589                                                                                      | Private clinic of Biogen Med, Tashkent, Uzbekistan                                                                                                                                                             | Center of Genomics and bioinformatics, Bioinformatics laboratory                                                                                    | Mirzakamol S Ayubov, Zabardast T Buriev, Mukhammadjon H Mirzakhmedov, Abdurakhmon N Yusupov, Shukhrat E Shermatov, Ibrokhim Y Abdurakhmonov.                                                                                                                                                                                                                                                                                                                                                                                                                                                                                                              |
| EPI_ISL_1443002                                                                                      | Institut National d'hygiène                                                                                                                                                                                    | "Unité Mixte Internationale TransVIHMI (UMI 233 IRD - U1175 INSERM - Université de Montpellier) IRD (Institut de recherche pour le développement)"  | Mounerou SALOU, Christelle BUTEL, Wembo A. HALATOKO, Issaka Maman, Abia A. KONOU, Amivi EHLAN, Adodo SADJI, Kokou TEGUENI, Sidonie A.M.KAGNISSODE, Akoélé SILIADIN, Alassane OURO-MEDELI, Messanh DOUFFAN, Déléma MABA, Sika DOSSIM, Améyo DORKENOO, Mireille PRINCE-DAVID, Anoumou DAGNRA, Laetitia SERRANO, Ahidjo AYOUBA, Eric DELAPORTE, Martine PEETERS                                                                                                                                                                                                                                                                                              |
| EPI_ISL_1443890                                                                                      | Labo Analyses Med                                                                                                                                                                                              | National Reference Center for Viruses of Respiratory Infections, Institut Pasteur, Paris                                                            | Marion Barbet, Sylvie Behillil, Méline Bizard, Frédéric Lemoine, Corinne Maufrais, Christophe Malabat, Angela Brisebarre, Camille Capel, Louise Lefrançois, Etienne Simon-Lorière, Vincent Enouf, Maud Vanpeene, Sylvie van der Werf, Sophie Chalmin                                                                                                                                                                                                                                                                                                                                                                                                      |
| EPI_ISL_1463502                                                                                      | Labo Analyses Med                                                                                                                                                                                              | National Reference Center for Viruses of Respiratory Infections, Institut Pasteur, Paris                                                            | Marion Barbet, Sylvie Behillil, Frédéric Lemoine, Corinne Maufrais, Christophe Malabat, Méline Bizard, Angela Brisebarre, Camille Capel, Louise Lefrançois, Etienne Simon-Lorière, Vincent Enouf, Maud Vanpeene, Sylvie van der Werf, Nabil Gastli                                                                                                                                                                                                                                                                                                                                                                                                        |
| EPI_ISL_1469097                                                                                      | LabPLUS                                                                                                                                                                                                        | Institute of Environmental Science and Research (ESR)                                                                                               | Rachel Boyle, SallyAnn Harbison, Olivia Stroeven, Xiaoyun Ren, Matt Storey, Nikki Freed, Muhammad Faisal, Jing Wang, Hermes Perez, Anja Werner, Antje van der Linden, Arlo Upton, Chris Mansell, David Hammer, Dragana Drinkovic, Gary McAlliff, Hana Sofia Andersson, James Ussher, Jill Sherwood, Josh Freeman, Julia Howard, Juliet Elvy, Mary DeAlmeida, Matt Blakiston, Matthew Rogers, Max Bloomfield, Michael Addidge, Michelle Balm, Sally Roberts, Sarah Jefferies, Sharmini Mutaiyah, Susan Morpeth, Susan Taylor, Timothy Blackmore, Vani Sathyendran, Veronica Playle, Virginia Hope, Erasmus Smit, Lauren Jelly, Olin Silander, Joep de Ligt |
| EPI_ISL_1469327                                                                                      | MRC/UVRI & LSHTM Uganda Research Unit                                                                                                                                                                          | Where sequence data have been generated and submitted to GISAID                                                                                     | Matthew Cotten, Dan Lule Bugembe, My V.T. Phan, Isaac Sseeewanyana, Patrick Semanda, Susan Nabadda, Pontiano Kaleebu                                                                                                                                                                                                                                                                                                                                                                                                                                                                                                                                      |
| EPI_ISL_1470059                                                                                      | North Estonia Medical Centre laboratory                                                                                                                                                                        | 1. Laboratory of Communicable Diseases (Estonia); 2. Eurofins Genomics Europe Sequencing GmbH                                                       | Liidia Dotsenko et al.                                                                                                                                                                                                                                                                                                                                                                                                                                                                                                                                                                                                                                    |
| EPI_ISL_1490254                                                                                      | The Caribbean Public Health Agency                                                                                                                                                                             | Carrington Lab, Department of PreClinical Sciences, Faculty of Medical Sciences, The University of the West Indies                                  | Nikita S. D. Sahadeo, Arianne Brown-Jordan, Sarah Hill, Vernie Ramkissoon, Roshan Parasram, Naresh Nandram, Avery Hinds, Jerome Foster, Stanley Giddings, Karla Georges, Marsha Ivey, Rahul Naidu, Risha Singh, SueMin Nathaniel, Rajini Haraksingh, Jaya Jayaraman, Chinna Chinnadurai, Adesh Ramsuhgah, Nuno Faria, Oliver Pybus, Christopher F. F. Carrington                                                                                                                                                                                                                                                                                          |
| EPI_ISL_1491712, EPI_ISL_1491729                                                                     | HELIX LLC                                                                                                                                                                                                      | WHO National Influenza Centre Russian Federation                                                                                                    | Andrey Komissarov, Artem Fadeev, Anna Ivanova, Kseniya Komissarova, Alexey Masharsky, Maria Baturova, Dmitry Bazhenov, Tamila Musaeva, Maria Timofeeva, Veronika Eder, Maria Pisareva, Daria Danilenko, Ksenia Safina, Elena Nabieva, Georgii Bazykin, Dmitry Lioznov                                                                                                                                                                                                                                                                                                                                                                                     |
| EPI_ISL_1497491, EPI_ISL_1497493                                                                     | National Public Health Organization                                                                                                                                                                            | National Public Health Organization                                                                                                                 | Kyriaki Tryfinopoulou et al                                                                                                                                                                                                                                                                                                                                                                                                                                                                                                                                                                                                                               |
| EPI_ISL_1509002                                                                                      | Institut National d'hygiène                                                                                                                                                                                    | Unité Mixte Internationale TransVIHMI (UMI 233 IRD - U1175 INSERM - Université de Montpellier) IRD (Institut de recherche pour le développement)    | Mounerou SALOU, Christelle BUTEL, Wembo A. HALATOKO, Amivi EHLAN, Abia A. KONOU, Issaka Maman, Syntyche DEVATCHAGNI, Adodo SADJI, Kokou TEGUENI, Kokou AGBODEKA, Sidonie A.M.KAGNISSODE, Akoélé SILIADIN, Alassane OURO-MEDELI, Messanh DOUFFAN, Déléma MABA, Sika DOSSIM, Améyo DORKENOO, Mireille PRINCE-DAVID, Anoumou DAGNRA, Laetitia SERRANO, Ahidjo AYOUBA, Eric DELAPORTE, Martine PEETERS                                                                                                                                                                                                                                                        |
| EPI_ISL_1509764, EPI_ISL_1509771, EPI_ISL_1509873                                                    | National Center of Infectious and Parasitic Diseases                                                                                                                                                           | National Center of Infectious and Parasitic Diseases                                                                                                | Alexiev, Ivanov, Korsun, Stoitsova, Philipova, Dimitrova, Grigороva L., Hristova, Donchev, Stoykov, Trifonova, Dobrinov, Grigороva I., Kantardjiev                                                                                                                                                                                                                                                                                                                                                                                                                                                                                                        |
| EPI_ISL_1510608, EPI_ISL_1510609, EPI_ISL_1510610, EPI_ISL_1510614, EPI_ISL_1510618, EPI_ISL_1510619 | Molecular diagnostic laboratory of Federal Budget Institution of Science "Central Research Institute of Epidemiology" of The Federal Service on Customers' Rights Protection and Human Well-being Surveillance | Group of Genomics and Postgenomic Technologies of Central Research Institute of Epidemiology                                                        | Samoilov AE, Kaptelova VV, Korneenko EV, Valdochkina AV, Bulanenko VP, Saenko SS, Golubeva AG, Zotova MI, Berlina YY, Solovyeva ED, Cherkashina AS, Shipulina OY, Speranskaya AS, Tivanova EV, Kondrasheva LY, Akimkin VG                                                                                                                                                                                                                                                                                                                                                                                                                                 |
| EPI_ISL_1511088                                                                                      | Institute of Microbiology and Immunology, Faculty of Medicine, University of Ljubljana                                                                                                                         | Institute of Microbiology and Immunology, Faculty of Medicine, University of Ljubljana                                                              | Alen Sulji, Samo Zakotnik, Tomaž Mark Zorec, Matic Brvar, Doroteja Vljaj, Andraž Celar, Dominika Šturm, Patricija Pozvek, Špela Pleh, Miša Korva, Mario Poljak, Tatjana Avši - Županc                                                                                                                                                                                                                                                                                                                                                                                                                                                                     |
| EPI_ISL_1516838                                                                                      | Botswana Harvard HIV Reference Laboratory                                                                                                                                                                      | Botswana Harvard HIV Reference Laboratory                                                                                                           | Sikhulile Wonderfull T. Choga, Dorcas Maruapula, Thongbotho Mphoyakgosi, Boitumelo Zuze, Botshelo Radibe, Legodile Kooepile, David Lawrence, Roger Shapiro, Shahin Lockman, Mosepele Mosepele, Joseph Makhema, Simani Gaseitsiwe                                                                                                                                                                                                                                                                                                                                                                                                                          |
| EPI_ISL_1516857                                                                                      | Botswana Harvard HIV Reference Laboratory                                                                                                                                                                      | Botswana Harvard HIV Reference Laboratory                                                                                                           | Sikhulile Dorcas Maruapula, Wonderfull T. Choga, Thongbotho Mphoyakgosi, Boitumelo Zuze, Botshelo Radibe, Legodile Kooepile, David Lawrence, Roger Shapiro, Shahin Lockman, Mosepele Mosepele, Joseph Makhema, Simani Gaseitsiwe                                                                                                                                                                                                                                                                                                                                                                                                                          |
| EPI_ISL_1524122                                                                                      | Public Health Authority of the Slovak Republic                                                                                                                                                                 | Laboratory of Genomics and Bioinformatics, Comenius University Science Park                                                                         | Tatiana Sedláková, Diana Rusáková, Miroslav Böhmer, Anna Giová, Jaroslav Budiš, Tomáš Szemes                                                                                                                                                                                                                                                                                                                                                                                                                                                                                                                                                              |
| EPI_ISL_1524356, EPI_ISL_1524362, EPI_ISL_1524364                                                    | Biology Department, College of Science, Al Muthanna University and Public Health Laboratory, Al-Muthanna Health Directorate                                                                                    | Department of Virology, Faculty of Medicine, University of Helsinki, Helsinki, Finland generated and submitted to GISAID                            | Nihad Al-Rashedi, Hussein Alburkat, Murad Munahi, Alaa Hameed, Ali Jasim, Olli Vapalahti, Tarja Sironen, Teemu Smura                                                                                                                                                                                                                                                                                                                                                                                                                                                                                                                                      |
| EPI_ISL_1524708, EPI_ISL_1524720                                                                     | Laboratoire Biolim/FSS/UL                                                                                                                                                                                      | Unité Mixte Internationale TransVIHMI (UMI 233 IRD - U1175 INSERM - Université de Montpellier) IRD (Institut de recherche pour le développement)    | Mounerou SALOU, Christelle BUTEL, Wembo A. HALATOKO, Amivi EHLAN, Abia A. KONOU, Issaka Maman, Syntyche DEVATCHAGNI, Adodo SADJI, Kokou TEGUENI, Kokou AGBODEKA, Sidonie A.M.KAGNISSODE, Akoélé SILIADIN, Alassane OURO-MEDELI, Messanh DOUFFAN, Déléma MABA, Sika DOSSIM, Améyo DORKENOO, Mireille PRINCE-DAVID, Anoumou DAGNRA, Laetitia SERRANO, Ahidjo AYOUBA, Eric DELAPORTE, Martine PEETERS                                                                                                                                                                                                                                                        |
| EPI_ISL_1532284                                                                                      | Oman-National Influenza Center                                                                                                                                                                                 | Biotechnology & OMICs Laboratory                                                                                                                    | Ahmed Al Harrasi, Aisha Al-Amri, Intisar Al-Shukri, Amal Al-Maani, Sajjad Asaf, Bilal Hussain, Samiya Al-Zadjali, Ahmed N Al-Rawahi, Saqib Bilal, Abdul Latif Khan, Samira Al-Mahruqi, Ahmed Al-Rawahi, Hanan Al-Kindi, Amina Al-Jardani                                                                                                                                                                                                                                                                                                                                                                                                                  |
| EPI_ISL_1532297                                                                                      | Oman-National Influenza Center                                                                                                                                                                                 | Biotechnology & OMICs Laboratory                                                                                                                    | Abdul Latif Khan, Aisha Al-Amri, Intisar Al-Shukri, Amal Al-Maani, Sajjad Asaf, Bilal Hussain, Samiya Al-Zadjali, Ahmed N Al-Rawahi, Saqib Bilal, Samira Al-Mahruqi, Ahmed Al-Rawahi, Hanan Al-Kindi, Amina Al-Jardani, Ahmed Al Harrasi.                                                                                                                                                                                                                                                                                                                                                                                                                 |
| EPI_ISL_1532800                                                                                      | Cambodian National Public Health Laboratory, National Institute of Public Health                                                                                                                               | Virology Unit, Institut Pasteur du Cambodge                                                                                                         | Sokhoun Yann, Teyputita Ou, Leakhena Pum, Ly Sovann, Kraing Sidonn, Yi Sengdoeurn, Chin Savuth, Chau Darapheap, Veasna Duong, Erik A Karlsson                                                                                                                                                                                                                                                                                                                                                                                                                                                                                                             |
| EPI_ISL_1532811                                                                                      | Virology Unit, Institut Pasteur du Cambodge                                                                                                                                                                    | Virology Unit, Institut Pasteur du Cambodge                                                                                                         | Sokhoun Yann, Teyputita Ou, Leakhena Pum, Ly Sovann, Kraing Sidonn, Chin Savuth, Chau Darapheap, Veasna Duong, Erik A Karlsson                                                                                                                                                                                                                                                                                                                                                                                                                                                                                                                            |
| EPI_ISL_1533981                                                                                      | Laboratorio Nacional de Salud                                                                                                                                                                                  | Laboratory of Respiratory Viruses and Measles, Oswaldo Cruz Institute, FIOCRUZ                                                                      | Paola Resende, Cesar Roberto Conde Pereira, Claudia Estrada, Luciana Appolinario, Fernando Motta, Anna Carolina Paixao, Ana Carolina Mendonca, Marilda Siqueira on behalf of the FioCruz COVID-19 Genomic Surveillance Network                                                                                                                                                                                                                                                                                                                                                                                                                            |
| EPI_ISL_1544111                                                                                      | B.J. Medical College and Civil hospital, Ahmedabad                                                                                                                                                             | Gujarat Biotechnology Research Centre                                                                                                               | Kamlesh J Upadhyay, Ramesh Pandit, Janvi Raval, Zarna Patel, Nitin Savaliya, Dinesh Kumar, Twinkle Soni, Sonal Sharma, Zuber Saiyed, Pranay Shah, Sanjay Kapadia, Dipa Kinariwala, Umang Mishra, Nitesh Shah, Chaitanya Joshi, Madhvi Joshi                                                                                                                                                                                                                                                                                                                                                                                                               |
| EPI_ISL_1544114                                                                                      | B.J. Medical College and Civil hospital, Ahmedabad                                                                                                                                                             | Gujarat Biotechnology Research Centre                                                                                                               | Umang Mishra, Nitin Savaliya, Dinesh Kumar, Twinkle Soni, Sonal Sharma, Zuber Saiyed, Ramesh Pandit, Janvi Raval, Zarna Patel, Pranay Shah, Kamlesh J                                                                                                                                                                                                                                                                                                                                                                                                                                                                                                     |

|                                                                                     |                                                                                                                                                         |                                                                                                                                |                                                                                                                                                                                                                                                                                                                                                                                                                                                                                                                                                                                                                                                                                                                                                                                                                                                                                                                                                                                                                                                      |
|-------------------------------------------------------------------------------------|---------------------------------------------------------------------------------------------------------------------------------------------------------|--------------------------------------------------------------------------------------------------------------------------------|------------------------------------------------------------------------------------------------------------------------------------------------------------------------------------------------------------------------------------------------------------------------------------------------------------------------------------------------------------------------------------------------------------------------------------------------------------------------------------------------------------------------------------------------------------------------------------------------------------------------------------------------------------------------------------------------------------------------------------------------------------------------------------------------------------------------------------------------------------------------------------------------------------------------------------------------------------------------------------------------------------------------------------------------------|
|                                                                                     |                                                                                                                                                         |                                                                                                                                | Upadhyay,Sanjay Kapadia,Dipa Kinariwala,Nitesh Shah,Chaitanya Joshi,Madhvi Joshi                                                                                                                                                                                                                                                                                                                                                                                                                                                                                                                                                                                                                                                                                                                                                                                                                                                                                                                                                                     |
| EPI_ISL_1544117                                                                     | B.J. Medical College and Civil hospital, Ahmedabad                                                                                                      | Gujarat Biotechnology Research Centre                                                                                          | Nitesh Shah,Sonal Sharma ,Zuber Saiyed,Ramesh Pandit,Janvi Raval,Zarna Patel,Nitin Savaliya,Dinesh Kumar,Twinkle Soni,Pranay Shah,Kamlesh J Upadhyay,Sanjay Kapadia,Dipa Kinariwala,Umang Mishra,Chaitanya Joshi,Madhvi Joshi                                                                                                                                                                                                                                                                                                                                                                                                                                                                                                                                                                                                                                                                                                                                                                                                                        |
| EPI_ISL_1547512                                                                     | Dept. of Medical Microbiology, Stavanger University Hospital, Helse Stavanger HF                                                                        | Norwegian Institute of Public Health, Department of Virology                                                                   | Kathrine Stene-Johansen, Kamilla Heddeland Instefjord, Hilde Elshaug, Garcia Llorente Ignacio, Jon Bråte, Engebretsen Serina Beate,Pedersen Benedikte Nevjen, Debech Nadia, Atiya R Ali,Marie Paulsen Madsen, Rasmus Riis Kopperud, Hilde Vollan, Karoline Bragstad, Olav Hungnes                                                                                                                                                                                                                                                                                                                                                                                                                                                                                                                                                                                                                                                                                                                                                                    |
| EPI_ISL_1554941                                                                     | Hospital                                                                                                                                                | National Reference Center for Viruses of Respiratory Infections, Institut Pasteur, Paris                                       | Marion Barbet, Sylvie Behillil, Méline Bizard, Angela Brisebarre, Camille Capel,Frédéric Lemoine,Corinne Maufrais,Christophe Malabat, Damien Mornico, Louise Lefrançois, Etienne Simon-Lorière, Vincent Enouf, Maud Vanpeene, Sylvie van der Werf,Guinard Jérôme                                                                                                                                                                                                                                                                                                                                                                                                                                                                                                                                                                                                                                                                                                                                                                                     |
| EPI_ISL_1577907                                                                     | Laboratory for Clinical Immunology and Molecular Genetics - University Clinic Golnik Laboratory for Respiratory Microbiology - University Clinic Golnik | Laboratory for Clinical Immunology and Molecular Genetics -University Clinic Golnik                                            | Matija Rijavec, Julij Šelb, Urška Bidovec Stojkovi, Žan Kogovšek, Nina Rupar, Viktorija Tomi, Peter Korošec                                                                                                                                                                                                                                                                                                                                                                                                                                                                                                                                                                                                                                                                                                                                                                                                                                                                                                                                          |
| EPI_ISL_1583006                                                                     | Institute for Medical Research, Infectious Disease Research Centre, National Institutes of Health, Ministry of Health Malaysia                          | Institute for Medical Research, Infectious Disease Research Centre, National Institutes of Health, Ministry of Health Malaysia | Suppiah J, Kamel K, Mohd Zawawi Z, Ramly N, Robert F, Thayan R                                                                                                                                                                                                                                                                                                                                                                                                                                                                                                                                                                                                                                                                                                                                                                                                                                                                                                                                                                                       |
| EPI_ISL_1585444                                                                     | Unidad de Investigación Médica de Yucatán (UIMY)                                                                                                        | Instituto Nacional de Enfermedades Respiratorias (INER): Centro de Investigación en Enfermedades Infecciosas (CIENI)           | Consortio Mexicano de Vigilancia Genómica (CoViGen-Mex). Authors (in alphabetical order): Julio Elias Alvarado-Yaah, Carlos F. Arias, Santiago Ávila-Rios, Víctor Hugo Borja-Aburto, Celia Boukadida, Juan Bautista Chale-Dzul, Célida Duque Molina, José Antonio Enciso-Moreno, Gloria Elena Espinosa-Ayala, Fernando Fontove-Herrera, Víctor Eduardo García-Arias, Concepción Grajales-Muñiz, Ricardo Grande, Alfredo Herrera-Estrella, Carla Ivón Herrera-Najera, Pavel Isa, Brenda Irasema Maldonado-Meza, Bernardo Martínez-Miguel, Margarita Matias-Florentino, María Guadalupe de Jesús Mireles-Rivera, Gloria María Molina-Salinas, Hector Montoya-Fuentes, José Esteban Muñoz-Medina, José de Jesús Nuñez-Contreras, Alicia Ocaña-Mondragón, Luis Alberto Ochoa-Carrera, Hector Esteban Paz-Juárez, Francisco Pulido, Helen Haydee Fernanda Ramirez-Plascencia, Angel Gustavo Salas-Lais, Alejandro Sanchez-Flores, Clara Esperanza Santacruz-Tinoco, María Guadalupe Santiago-Mauricio, Nelly Sélem-Mojica, Blanca Taboada, Gloria Vazquez |
| EPI_ISL_1587827                                                                     | NL-Dr. Leonard A. Miller Centre for Health Services                                                                                                     | National Microbiology Laboratory (NML)                                                                                         | Anna Majer, Shari Tyson, Grace Seo, Philip Mabon, Elsie Grudeski, Rhiannon Huzarewich, Russell Mandes, Anneliese Landgraf, Jennifer Tanner, Natalie Knox, Morag Graham, Gary Van Domselaar, Robert Needle, Yang Yu, Adel Malek, Laura Gilbert, George Zahariadis, Nathalie Bastien, Yan Li, Timothy Booth, Darian Hole, Madison Chapel, Kirsten Biggar, Kerri Smith, CanCOGen's metadata curation team, Public Health Agency of Canada CanCOGen team                                                                                                                                                                                                                                                                                                                                                                                                                                                                                                                                                                                                 |
| EPI_ISL_1588125, EPI_ISL_1588126, EPI_ISL_1588189, EPI_ISL_1588196, EPI_ISL_1588247 | NB-Hôpital Georges L. Dumont                                                                                                                            | National Microbiology Laboratory (NML)                                                                                         | Anna Majer, Shari Tyson, Grace Seo, Philip Mabon, Elsie Grudeski, Rhiannon Huzarewich, Russell Mandes, Anneliese Landgraf, Jennifer Tanner, Natalie Knox, Morag Graham, Gary Van Domselaar, Richard Garceau, Guillaume Desnoyers, Nathalie Bastien, Yan Li, Timothy Booth, Darian Hole, Madison Chapel, Kirsten Biggar, CanCOGen's metadata curation team, Public Health Agency of Canada CanCOGen team                                                                                                                                                                                                                                                                                                                                                                                                                                                                                                                                                                                                                                              |
| EPI_ISL_1628371                                                                     | Centro De Saude II Ibitinga                                                                                                                             | Instituto Adolfo Lutz, Interdisciplinary Procedures Center, Strategic Laboratory                                               | Claudio Tavares Sacchi, Claudia Regina Gonçalves, Erica Valessa Ramos Gomes, Karoline Rodrigues Campos, Caio Vinicius Dias Lopes, Leonardo Jose Tadeu de Araujo, Katia Correa de Oliveira Santos                                                                                                                                                                                                                                                                                                                                                                                                                                                                                                                                                                                                                                                                                                                                                                                                                                                     |
| EPI_ISL_1629459                                                                     | CHU                                                                                                                                                     | UMR PIMIT                                                                                                                      | Dr David A Wilkinson, Dr Patrick Mavingui, Dr Camille Lebarbenchon, Magali Turpin                                                                                                                                                                                                                                                                                                                                                                                                                                                                                                                                                                                                                                                                                                                                                                                                                                                                                                                                                                    |
| EPI_ISL_1669990                                                                     | General Hospital - Ohrid                                                                                                                                | Laboratory of virology and molecular diagnostics, Institute of Public Health                                                   | Kuzmanovska M, Boshevska G, Janchevska E.                                                                                                                                                                                                                                                                                                                                                                                                                                                                                                                                                                                                                                                                                                                                                                                                                                                                                                                                                                                                            |
| EPI_ISL_1678384, EPI_ISL_1678387                                                    | Laboratory for Clinical Immunology and Molecular Genetics - University Clinic Golnik Laboratory for Respiratory Microbiology - University Clinic Golnik | Laboratory for Clinical Immunology and Molecular Genetics -University Clinic Golnik                                            | Matija Rijavec, Julij Šelb, Urška Bidovec Stojkovi, Žan Kogovšek, Nina Rupar, Viktorija Tomi, Peter Korošec                                                                                                                                                                                                                                                                                                                                                                                                                                                                                                                                                                                                                                                                                                                                                                                                                                                                                                                                          |
| EPI_ISL_1678418, EPI_ISL_1678478                                                    | HG Pharma GmbH                                                                                                                                          | Bergthaler laboratory, CeMM Research Center for Molecular Medicine of the Austrian Academy of Sciences                         | Lukas Endler, Anna Schedl, Fabian Amman, Petr Triska, Thomas Penz, Benedikt Agerer, Maelle Le Moing, Michael Schuster, Bekir Erguner, Jan Laine, Martin Senekowitsch, Christoph Bock, Andreas Bergthaler                                                                                                                                                                                                                                                                                                                                                                                                                                                                                                                                                                                                                                                                                                                                                                                                                                             |
| EPI_ISL_1686201                                                                     | Synlab Eesti OÜ                                                                                                                                         | 1. Laboratory of Communicable Diseases (Estonia); 2. Eurofins Genomics Europe Sequencing GmbH                                  | Liidia Dotsenko et al.                                                                                                                                                                                                                                                                                                                                                                                                                                                                                                                                                                                                                                                                                                                                                                                                                                                                                                                                                                                                                               |
| EPI_ISL_1701124                                                                     | Alameda County Public Health Lab                                                                                                                        | Chan-Zuckerberg Biohub                                                                                                         | CZB Clichub Consortium                                                                                                                                                                                                                                                                                                                                                                                                                                                                                                                                                                                                                                                                                                                                                                                                                                                                                                                                                                                                                               |
| EPI_ISL_1707690                                                                     | Instituto Adolfo Lutz - Regional de Taubate                                                                                                             | Instituto Adolfo Lutz, Interdisciplinary Procedures Center, Strategic Laboratory                                               | Claudio Tavares Sacchi, Claudia Regina Gonçalves, Erica Valessa Ramos Gomes, Karoline Rodrigues Campos, Caio Vinicius Dias Lopes, Leonardo Jose Tadeu de Araujo, Katia Correa de Oliveira Santos                                                                                                                                                                                                                                                                                                                                                                                                                                                                                                                                                                                                                                                                                                                                                                                                                                                     |
| EPI_ISL_1711978                                                                     | Virology Unit, Institut Pasteur du Cambodge                                                                                                             | Virology Unit, Institut Pasteur du Cambodge                                                                                    | Jurre Y Siegers, Teyputita Ou, Leakhena Pum, Cecile Troupin, Ly Sovann, Kraing Sidonn, Yi Sengdoeurn, Chin Savuth, Chau Darapeak, Veasna Duong, Erik A Karlsson                                                                                                                                                                                                                                                                                                                                                                                                                                                                                                                                                                                                                                                                                                                                                                                                                                                                                      |
| EPI_ISL_1713976, EPI_ISL_1713997                                                    | Ministry of Public Health / Hamad Medical Corporation                                                                                                   | Weill Cornell Medical College - Qatar (WCM-Q), Genomics Core Laboratory / Qatar Genome Project (QGP)                           | WCMQ: Ayeda A. Ahmed, Meryem Bensaad, Shameem Younuskuji, Yasmin Mohamoud, Laith Abu-Raddad, Joel A Malek. QGP: Fatima H. Al-Kuwari, Chadi Saad MOPH and HMC: Abdullatif Al-Khal, Muna A. S. Al-Maslami, Mashaal A. Al-Bader, Hamda Alromaihi, Roberto Bertolini, Peter V. Coyle, Einas A. E. Al-Kuwari, Hamad E. Al-Romaihi, Salih Al-Marri, Mohammed Al-Thani, Reham A. El-Kahlout. QBB: Tasneem Al-Hamad, Dina Elgakhlab                                                                                                                                                                                                                                                                                                                                                                                                                                                                                                                                                                                                                          |
| EPI_ISL_1731563                                                                     | MRCG at LSHTM Genomics lab                                                                                                                              | MRCG at LSHTM Genomics lab                                                                                                     | Abdul Karim sesay, Abdoulie Kante, Jarra Manneh, Mariama Kujabi, Bakary Sanyang                                                                                                                                                                                                                                                                                                                                                                                                                                                                                                                                                                                                                                                                                                                                                                                                                                                                                                                                                                      |
| EPI_ISL_1752644                                                                     | Instituto Adolfo Lutz - Regional de Ribeirao Preto                                                                                                      | Instituto Adolfo Lutz, Interdisciplinary Procedures Center, Strategic Laboratory                                               | Claudio Tavares Sacchi, Claudia Regina Gonçalves, Erica Valessa Ramos Gomes, Karoline Rodrigues Campos, Caio Vinicius Dias Lopes, Leonardo Jose Tadeu de Araujo, Katia Correa de Oliveira Santos                                                                                                                                                                                                                                                                                                                                                                                                                                                                                                                                                                                                                                                                                                                                                                                                                                                     |
| EPI_ISL_1785073                                                                     | Infectious Agents & Hygiene                                                                                                                             | GIMAP and Virpath teams-CIRI                                                                                                   | Sylvie Pillet, Thomas Bourlet, Julien Fouret, Thomas Julien, Victoria Dulière, Olivier Terrier, Andrés Pizzorno, Manuel Rosa-Calatrava, Bruno Pozzetto, Stéphane Paul                                                                                                                                                                                                                                                                                                                                                                                                                                                                                                                                                                                                                                                                                                                                                                                                                                                                                |
| EPI_ISL_1805479                                                                     | LESP Chihuahua                                                                                                                                          | Instituto de Diagnostico y Referencia Epidemiologicos (INDRE)                                                                  | Claudia Wong-Arambula, Abril Rodríguez-Maldonado, Vanessa Rivero-Arredondo, Ariadna Medina-Benitez, Joaquin Quiroz-Mercado, Sergio Rangel-Guerrero, Natividad Cruz-Ortiz, Tatiana Nunez-Garcia, Gisela Barrera-Badillo, Lucia Hernandez-Rivas, Irma Lopez-Martinez, Ernesto Ramirez-Gonzalez.                                                                                                                                                                                                                                                                                                                                                                                                                                                                                                                                                                                                                                                                                                                                                        |
| EPI_ISL_1811229                                                                     | AS Belen Flores                                                                                                                                         | Incienza, Instituto Costarricense de Investigación y Enseñanza en Nutrición y Salud                                            | Pérez-Corrales C & Centeno-Miranda M                                                                                                                                                                                                                                                                                                                                                                                                                                                                                                                                                                                                                                                                                                                                                                                                                                                                                                                                                                                                                 |
| EPI_ISL_1821627, EPI_ISL_1821629                                                    | Labo Analyses Med                                                                                                                                       | National Reference Center for Viruses of Respiratory Infections, Institut Pasteur, Paris                                       | Marion Barbet, Sylvie Behillil, Méline Bizard, Angela Brisebarre, Camille Capel, Vincent Enouf, Louise Lefrançois, Frédéric Lemoine, Christophe Malabat, Corinne Maufrais, Etienne Simon-Lorière, Maud Vanpeene, Sylvie Van der Werf, Dominique Rousset                                                                                                                                                                                                                                                                                                                                                                                                                                                                                                                                                                                                                                                                                                                                                                                              |
| EPI_ISL_1824603                                                                     | National Institute of Health Research and Development                                                                                                   | National Institute of Health Research and Development                                                                          | Subangkit, Hana Apsari Pawestri, Kartika Dewi Puspa, Arie Ardiansyah Nugraha, Hartanti Dian Ikawati, Krisna Nur Andriana Pangesti, Yuni Rukminiati, Ririn Ramadhany, Agustingsih, Kindi Adam, Holy Arif Wibowo, Triyani Soekarso, Ni Ketut Susilarini, Nurika Hariastuti, Uly Alfi Nikmah, Reni Herman, Nike Susanti, Herna, Tati Febriyanti, Natalie Laurencia Kipuw, Fauzul Muna, Irene Lorinda Indalao, Nelly Puspandari, Vivi Setiawaty.                                                                                                                                                                                                                                                                                                                                                                                                                                                                                                                                                                                                         |
| EPI_ISL_1825678                                                                     | COVID-19 Detection Lab, Chattogram Veterinary and Animal Sciences University                                                                            | Genomic Research Lab, Bangladesh Council of Scientific and Industrial Research                                                 | Goutam Buddha Das, Tridip Das, Tanvir Ahmad Nazami, Eaftekar Ahmed Rana, Md. Sirazul Islam, Proneh Dutta, Sharmin Chowdhury, Md. Morshed Hasan Sarkar, Md. Salim Khan, Paritosh Kumar Biswas                                                                                                                                                                                                                                                                                                                                                                                                                                                                                                                                                                                                                                                                                                                                                                                                                                                         |
| EPI_ISL_1840890, EPI_ISL_1840896                                                    | 3. Medizinische Abteilung, Hanusch Krankenhaus                                                                                                          | Bergthaler laboratory, CeMM Research Center for Molecular Medicine of the Austrian Academy of Sciences                         | Lukas Endler, Anna Schedl, Fabian Amman, Petr Triska, Thomas Penz, Benedikt Agerer, Maelle Le Moing, Michael Schuster, Bekir Erguner, Jan Laine, Martin Senekowitsch, Christoph Bock, Andreas Bergthaler                                                                                                                                                                                                                                                                                                                                                                                                                                                                                                                                                                                                                                                                                                                                                                                                                                             |
| EPI_ISL_1855390                                                                     | Indonesian Research Center for Veterinary Science/BBalitvet                                                                                             | Indonesian Research Center for Veterinary Science/BBalitvet                                                                    | Ni Luh Puthu Indi Dharmayanti, Diana Nurjanah, Risa Indriani, Harimurti Nuradji, Ilham Chaidir, Sri Nowo Retno, Fadry Djufry                                                                                                                                                                                                                                                                                                                                                                                                                                                                                                                                                                                                                                                                                                                                                                                                                                                                                                                         |
| EPI_ISL_1905079                                                                     | Laboratoire Central de Virologie                                                                                                                        | Laboratoire de Biotechnologie                                                                                                  | Mouna Ouadghiri, Tarik Aanniz, Abdelmunim Essabbar, Ghizlane EL Amin, Amal Zouaki, Myriam Seffar, Hakima Kabbaj, Naima El Hafidi, Saaïd Amzazi, Lahcen Belyamani and Azeddine Ibrahim                                                                                                                                                                                                                                                                                                                                                                                                                                                                                                                                                                                                                                                                                                                                                                                                                                                                |
| EPI_ISL_437303                                                                      | Diagnostic- and Research Institute of Pathology, Medical University of Graz                                                                             | Diagnostic- and Research Institute of Pathology, Medical University of Graz                                                    | Karl Kashofer, Peter Regitnig, Martin Zacharias, Gregor Gorkiewicz                                                                                                                                                                                                                                                                                                                                                                                                                                                                                                                                                                                                                                                                                                                                                                                                                                                                                                                                                                                   |
| EPI_ISL_444068                                                                      | UCSF Clinical Microbiology Laboratory                                                                                                                   | Chan-Zuckerberg Biohub                                                                                                         | CZB Clichub Consortium                                                                                                                                                                                                                                                                                                                                                                                                                                                                                                                                                                                                                                                                                                                                                                                                                                                                                                                                                                                                                               |
| EPI_ISL_453464                                                                      | University College London, Great Ormond Street Hospital for                                                                                             | COVID-19 Genomics UK (COG-UK) Consortium                                                                                       | Sergi Castellano, Rachel Williams, Mark Kristiansen, Paola Resende Silva, Sunando Roy, Tony Brooks, Helena Tutill, Paola Niola, Patricia Dyal, Charlotte                                                                                                                                                                                                                                                                                                                                                                                                                                                                                                                                                                                                                                                                                                                                                                                                                                                                                             |

|                                                |                                                                                                                            |                                                                                                                                                                                                                                                                                                                                                                                                                                                                  |                                                                                                                                                                                                                                                                                                                                                                                                                                                                                                                                                                                                                                 |
|------------------------------------------------|----------------------------------------------------------------------------------------------------------------------------|------------------------------------------------------------------------------------------------------------------------------------------------------------------------------------------------------------------------------------------------------------------------------------------------------------------------------------------------------------------------------------------------------------------------------------------------------------------|---------------------------------------------------------------------------------------------------------------------------------------------------------------------------------------------------------------------------------------------------------------------------------------------------------------------------------------------------------------------------------------------------------------------------------------------------------------------------------------------------------------------------------------------------------------------------------------------------------------------------------|
| EPI_ISL_457395, EPI_ISL_457475                 | Children NHS Foundation Trust, Imperial College Healthcare NHS Trust<br>Quadram Institute Bioscience                       | COVID-19 Genomics UK (COG-UK) Consortium                                                                                                                                                                                                                                                                                                                                                                                                                         | Williams, Leysa Forrest, Yasmin Panchbhaya, Jacqueline Findlay, Sam Weeks, Julianne Brown, Kathryn Harris, Paul Randell, James Price, Alison Holmes, Judith Breuer<br>Dave J. Baker, Gemma L. Kay, Alp Aydin, Thanh Le-Viet, Steven Rudder, Ana P. Tedim, Anastasia Kolyva, Maria Diaz, Leonardo de Oliveira Martins, Nabil-Fareed Alikhan, Lizzie Meadows, Rachael Stanley, Ngozi Elumogo, Muhammed Yasir, Nicholas M. Thomson, Alexander J Trotter, Rachel Gilroy, Samuel Bloomfield, Claire Stuart, Andrew Bell, Reenesh Prakash, Samir Dervisevic, Alison E. Mather, John Wain, Mark Webber, Andrew J. Page, Justin O'Grady |
| EPI_ISL_459910                                 | Zoonotic and Exotic infection Diseases Division, Harbin Veterinary Research Institute, CAAS                                | Zoonotic and Exotic infection Diseases Division, Harbin Veterinary Resarrch Institute, CAAS                                                                                                                                                                                                                                                                                                                                                                      | Jinliang Wang, Lei Shuai, Chong Wang, Renqiang Liu, Xijun He, Xianfeng Zhang, Ziruo Sun, Dan Shan, Jinying Ge, Xijun Wang, Gongxun Zhong, Zhiyuan Wen, Zhigao Bu                                                                                                                                                                                                                                                                                                                                                                                                                                                                |
| EPI_ISL_461816                                 | Quadram Institute Bioscience                                                                                               | COVID-19 Genomics UK (COG-UK) Consortium                                                                                                                                                                                                                                                                                                                                                                                                                         | Dave J. Baker, Gemma L. Kay, Alp Aydin, Thanh Le-Viet, Steven Rudder, Ana P. Tedim, Anastasia Kolyva, Maria Diaz, Leonardo de Oliveira Martins, Nabil-Fareed Alikhan, Lizzie Meadows, Rachael Stanley, Ngozi Elumogo, Muhammed Yasir, Nicholas M. Thomson, Alexander J Trotter, Rachel Gilroy, Samuel Bloomfield, Claire Stuart, Andrew Bell, Reenesh Prakash, Samir Dervisevic, Alison E. Mather, John Wain, Mark Webber, Andrew J. Page, Justin O'Grady                                                                                                                                                                       |
| EPI_ISL_465539                                 | Respiratory Virus Unit, Microbiology Services Colindale, Public Health England                                             | Respiratory Virus Unit, Microbiology Services Colindale, Public Health England                                                                                                                                                                                                                                                                                                                                                                                   | PHE Covid Sequencing Team                                                                                                                                                                                                                                                                                                                                                                                                                                                                                                                                                                                                       |
| EPI_ISL_476574                                 | Institut Pasteur Dakar                                                                                                     | Institut Pasteur de Dakar                                                                                                                                                                                                                                                                                                                                                                                                                                        | Ndongo Dia, Moussa Moise Diagne, Mamadou Diop, Ousmane Faye, Amadou Alpha Sall                                                                                                                                                                                                                                                                                                                                                                                                                                                                                                                                                  |
| EPI_ISL_481156                                 | Immunogenomics lab, Institute of Life Sciences, Bhubaneswar                                                                | Immunogenomics lab, Institute of Life Sciences, Bhubaneswar                                                                                                                                                                                                                                                                                                                                                                                                      | Sunil Raghav, Arup Ghosh, Ankita Datey, P. Shushree Shyamli, Bharati Singh, Neha Singh, Deepika Singh, Atimukta Jha, Viplov K. Biswas, Swati Madhulika, Manasi Priyadarshini, Aditi Chatterjee, Rahul Das, Soumyajit Ghosh, Rupesh Dash, Soma Chattopadhyay, Ghulam Hussain Syed, Shanti Senapati, Tushar K. Beuria, Rajeeb Swain, Punit Prasad, Amol Ratnakar Suryawanshi, Dileep Vasudeva, Orissa COVID-19 Study Group, DBT's PAN-INDIA 1000 SARS-CoV2 RNA genome sequencing consortium, Ajay Parida                                                                                                                          |
| EPI_ISL_481185                                 | Immunogenomics lab, Institute of Life Sciences, Bhubaneswar                                                                | Immunogenomics lab, Institute of Life Sciences, Bhubaneswar                                                                                                                                                                                                                                                                                                                                                                                                      | Sunil Raghav, Arup Ghosh, Atimukta Jha, Viplov K. Biswas, Swati Madhulika, Manasi Priyadarshini, Ajit Singh, Sivaram Krishna, Naga Jogayya Kothakota, Rupesh Dash, Soma Chattopadhyay, Ghulam Hussain Syed, Shanti Senapati, Tushar K. Beuria, Rajeeb Swain, Punit Prasad, Amol Ratnakar Suryawanshi, Dileep Vasudevan, Orissa COVID-19 Study Group, DBT's PAN-INDIA 1000 SARS-CoV2 RNA genome sequencing consortium, Ajay Parida                                                                                                                                                                                               |
| EPI_ISL_482413                                 | Providence St. Joseph Health Molecular Genomics Laboratory                                                                 | Providence St. Joseph Health Molecular Genomics Laboratory                                                                                                                                                                                                                                                                                                                                                                                                       | Alexa K Dowdell, Brian D Piening, Fred L Robinson, Carlo Bifulco, Mary Campbell                                                                                                                                                                                                                                                                                                                                                                                                                                                                                                                                                 |
| EPI_ISL_482546, EPI_ISL_482611                 | National Centre for Disease control (NCDC)                                                                                 | NCDC/CSIR-IGIB                                                                                                                                                                                                                                                                                                                                                                                                                                                   | Pramod Kumar#, Rajesh Pandey#, Pooja Sharma, Mahesh S Dhar, Vivekanand A, Bharathram Uppili, Robin Marwal, Radhakrishanan VS, Saruchi Wadhwa, Nishu Tyagi, Uma Sharma, Priyanka Singh, Hemlata Lall, Meena Datta, Varun Jaiswal, Hema Gogia, Preeti Madan, Prateek Singh, Debasis Dash, Mitali Mukerji, Sandhya Kabra, Sujeet Singh, Mohammed Faruq, Anurag Agrawal*, Partha Rakshit*                                                                                                                                                                                                                                           |
| EPI_ISL_482686                                 | Singapore General Hospital                                                                                                 | Department of Microbiology                                                                                                                                                                                                                                                                                                                                                                                                                                       | Nurdyana Abdul Rahman, Kun Lee Lim, Chenhao Li, Kian Sing Chan, Lynette Oon, Kern Rei Chng, Niranjan Nagarajan, Karrie Ko                                                                                                                                                                                                                                                                                                                                                                                                                                                                                                       |
| EPI_ISL_484901, EPI_ISL_484904, EPI_ISL_484915 | University of Wisconsin-Madison AIDS Vaccine Research Laboratories                                                         | University of Wisconsin-Madison AIDS Vaccine Research Laboratories                                                                                                                                                                                                                                                                                                                                                                                               | Gage Moreno, Katarina Braun, et al. AIDS Vaccine Research Laboratories                                                                                                                                                                                                                                                                                                                                                                                                                                                                                                                                                          |
| EPI_ISL_487362                                 | National Institute of Laboratory Medicine and Referral Center                                                              | Genomic Research Lab, BCSIR                                                                                                                                                                                                                                                                                                                                                                                                                                      | Md. Ahasan Habib, Abu Sayeed Mohammad Mahmud, Mohammad Samir Uzzaman, Eshrar Osman, Shahina Akter, Tanjina Akhter Banu, Md. Murshed Hasan Sarkar, Barna Goswami, Iffat Jahan, Md. Saddam Hossain, Tasnim Nafisa, Md. Maruf Ahmed Molla, Mahmuda Yeasmin, Asish Kumar Ghosh, A. K. M. Shamsuzzaman, Sheikh Md. Selim Al Din, Utpal Chandra Ray, Salek Ahmed Sajib, Md. Salim Khan                                                                                                                                                                                                                                                |
| EPI_ISL_489415                                 | Department of Pathology, University of Cambridge                                                                           | Wellcome Sanger Institute for the COVID-19 Genomics UK (COG-UK) consortium                                                                                                                                                                                                                                                                                                                                                                                       | Luke W Meredith, M. Estée Török, Myra Hosmillo, William L. Hamilton, Martin D. Curran, Theresa Feltwell, Grant Hall, Anna Yakovleva, Fahad A Khokhar, Charlotte J. Houldcroft, Laura G Caller, Aminu S. Jahun, Sarah L. Caddy, Ian Goodfellow, and Alex Alderton, Roberto Amato, Sonia Goncalves, Ewan Harrison, David K. Jackson, Ian Johnston, Dominic Kwiatkowski, Cordelia Langford, John Sillitoe on behalf of the Wellcome Sanger Institute COVID-19 Surveillance Team ( <a href="http://www.sanger.ac.uk/covid-team">http://www.sanger.ac.uk/covid-team</a> )                                                            |
| EPI_ISL_495827                                 | Washington State Department of Health                                                                                      | Seattle Flu Study                                                                                                                                                                                                                                                                                                                                                                                                                                                | Deborah A. Nickerson, Chris D. Frazier, Jover Lee, Benjamin Pelle, Matthew Richardson, Amanda Adler, Elisabeth Brandstetter, Peter D. Han, Kairsten Fay, Misja Ilicisin, Kirsten Lacombe, Thomas R. Sibley, Melissa Truong, Caitlin R. Wolf, Romesh Gautom, Geoff                                                                                                                                                                                                                                                                                                                                                               |
| EPI_ISL_500589                                 | National Virus Reference Laboratory                                                                                        | National Virus Reference Laboratory                                                                                                                                                                                                                                                                                                                                                                                                                              | Michael Carr, Gabriel Gonzalez, Jonathan Dean, Suzie Coughlan, Cillian F De Gascun                                                                                                                                                                                                                                                                                                                                                                                                                                                                                                                                              |
| EPI_ISL_509995                                 | University of Wisconsin-Madison AIDS Vaccine Research Laboratories                                                         | University of Wisconsin-Madison AIDS Vaccine Research Laboratories                                                                                                                                                                                                                                                                                                                                                                                               | Gage Moreno, Katarina Braun, et al. AIDS Vaccine Research Laboratories                                                                                                                                                                                                                                                                                                                                                                                                                                                                                                                                                          |
| EPI_ISL_510110                                 | Hospital General Universitario Gregorio Marañón                                                                            | SeqCOVID-SPAIN consortium/IBV/CSIC)                                                                                                                                                                                                                                                                                                                                                                                                                              | Laura Pérez-Lago, Marta Herranz, Jon Sicilia, Julia Suárez, Pilar Catalán, Patricia Muñoz, Darío García de Viedma and SeqCOVID-SPAIN consortium                                                                                                                                                                                                                                                                                                                                                                                                                                                                                 |
| EPI_ISL_511508                                 | Instituto Nacional de Saude (INSA)                                                                                         | Instituto Nacional de Saude (INSA) and Instituto Gulbenkian de Ciencia (IGC)                                                                                                                                                                                                                                                                                                                                                                                     | Borges et al                                                                                                                                                                                                                                                                                                                                                                                                                                                                                                                                                                                                                    |
| EPI_ISL_512547, EPI_ISL_512560                 | Florida Bureau of Public Health Laboratories                                                                               | Florida Bureau of Public Health Laboratories                                                                                                                                                                                                                                                                                                                                                                                                                     | Sarah Schmedes, Jason Blanton                                                                                                                                                                                                                                                                                                                                                                                                                                                                                                                                                                                                   |
| EPI_ISL_512598, EPI_ISL_512636                 | National Laboratory for Influenza/Virology reference laboratory, Public Health Center of the Ministry of Health of Ukraine | Respiratory Virus Unit, Microbiology Services Colindale, Public Health England                                                                                                                                                                                                                                                                                                                                                                                   | PHE Covid Sequencing Team, Dr. Iryna Demchyshyna                                                                                                                                                                                                                                                                                                                                                                                                                                                                                                                                                                                |
| EPI_ISL_515096                                 | Department of Biochemistry, Cell and Molecular Biology                                                                     | WACCBI, University of Ghana                                                                                                                                                                                                                                                                                                                                                                                                                                      | Ngoi,J.M., Quashie,P., Morang'a,C.M., Amuzu,D.S., Adu,B., Kumordjie,S., Eshun,M., Boatemaa,L., Magnussen.V., Kotey,E., Tei-Maya.F., Arjarquah,A., Mutungi,J.K., Bediako,Y., Asante,I., Bonney,E., Kyei,G.B., Bonney,K., Amenga-Etego,L.N., Anang,A.K., Awandare,G.A., Ampofo,W.                                                                                                                                                                                                                                                                                                                                                 |
| EPI_ISL_515696                                 | NHLS-IALCH                                                                                                                 | KRISP, KZN Research Innovation and Sequencing Platform                                                                                                                                                                                                                                                                                                                                                                                                           | Giandhari J, Pillay S, Lessells R, Mdlalose K, York D, Khan S, Tegally H, Wilkinson E, de Oliveira T                                                                                                                                                                                                                                                                                                                                                                                                                                                                                                                            |
| EPI_ISL_515830                                 | Medical Disagnostics Services (MDS)                                                                                        | KRISP, KZN Research Innovation and Sequencing Platform                                                                                                                                                                                                                                                                                                                                                                                                           | Giandhari J, Pillay S, Lessells R, ChimukangaraB, Mdlalose K, York D, Khan S, Tegally H, Wilkinson E, de Oliveira T                                                                                                                                                                                                                                                                                                                                                                                                                                                                                                             |
| EPI_ISL_516382                                 | Michigan Department of Health and Human Services, Bureau of Laboratories                                                   | Michigan Department of Health and Human Services, Bureau of Laboratories                                                                                                                                                                                                                                                                                                                                                                                         | Blankenship HM, Riner D, Soehnlén MK                                                                                                                                                                                                                                                                                                                                                                                                                                                                                                                                                                                            |
| EPI_ISL_516428                                 | Clinical Hospital - Shtip                                                                                                  | Research Center for Genetic Engineering and Biotechnology "Georgi D. Efremov", Macedonian Academy of Sciences and Arts                                                                                                                                                                                                                                                                                                                                           | RCGEB - MASA                                                                                                                                                                                                                                                                                                                                                                                                                                                                                                                                                                                                                    |
| EPI_ISL_516521                                 | University of Wisconsin-Madison AIDS Vaccine Research Laboratories                                                         | University of Wisconsin-Madison AIDS Vaccine Research Laboratories                                                                                                                                                                                                                                                                                                                                                                                               | Gage Moreno, Katarina Braun, et al. AIDS Vaccine Research Laboratories                                                                                                                                                                                                                                                                                                                                                                                                                                                                                                                                                          |
| EPI_ISL_516575, EPI_ISL_516588                 | Viollier AG                                                                                                                | Department of Biosystems Science and Engineering, ETH Zürich                                                                                                                                                                                                                                                                                                                                                                                                     | Christian Beisel, Sarah Nadeau, Ivan Topolsky, Pedro Ferreira, Philipp Jablonski, Susana Posada-Céspedes, Tobias Schär, Ina Nissen, Natascha Santacroce, Elodie Burcklen, Christiane Beckmann, Maurice Redondo, Olivier Kobel, Christoph Noppen, Sophie Seidel, Noemie Santamaría de Souza, Niko Beerenwinkel, Tanja Stadler                                                                                                                                                                                                                                                                                                    |
| EPI_ISL_516806                                 | Rumah Sakit PKU Gamping                                                                                                    | Genetics Working Group (Pokja Genetik) Faculty of Medicine, Public Health and Nursing Universitas Gadjah Mada (FK-KMK UGM); Disease Investigation Center Wates Ministry of Agriculture Indonesia; Department of Microbiology FK-KMK UGM; Laboratorium Diagnostik Yayasan Tahjia World Mosquito Program (WMP) Yogyakarta Center for Tropical Medicine FK-KMK UGM; Integrated Research center FK-KMK UGM; Department of Computer Science and Electronics FMIPA UGM | Gunadi, Hendra Wibawa, . Marcellus, Mohamad S. Hakim, Edwin W. Daniwijaya, Ludhang P. Rizki, Endah Supriyati, Eggi Arguni, Titik Nuryastuti, Tri Wibawa, Dwi AA Nugrahaningsih, . Afiahayati, . Siswanto, Ardorisye Sapatya Fornia, Kemal Athollah                                                                                                                                                                                                                                                                                                                                                                              |
| EPI_ISL_517807, EPI_ISL_517821,                | Florida Bureau of Public Health Laboratories                                                                               | Florida Bureau of Public Health Laboratories                                                                                                                                                                                                                                                                                                                                                                                                                     | Sarah Schmedes, Jason Blanton                                                                                                                                                                                                                                                                                                                                                                                                                                                                                                                                                                                                   |



|                                                                                                                                                                                |                                                                                             |                                                                            |                                                                                                                                                                                                                                                                                                                                                                                                                                                                                                                                                                                                         |
|--------------------------------------------------------------------------------------------------------------------------------------------------------------------------------|---------------------------------------------------------------------------------------------|----------------------------------------------------------------------------|---------------------------------------------------------------------------------------------------------------------------------------------------------------------------------------------------------------------------------------------------------------------------------------------------------------------------------------------------------------------------------------------------------------------------------------------------------------------------------------------------------------------------------------------------------------------------------------------------------|
| EPI_ISL_517832, EPI_ISL_517834, EPI_ISL_517858, EPI_ISL_517898, EPI_ISL_517906                                                                                                 | Dutch COVID-19 response team                                                                | Erasmus Medical Center                                                     | Bas Oude Munnink, David Nieuwenhuijse, Reina Sikkema, Claudia Schapendonk, Irina Chestakova, Anne van der Linden, Theo Bestebroer, Stefan van Nieuwkoop, Mark Pronk, Pascal Lexmond, Corien Swaan, Manon Haverkate, Madelief Mollers, Mart Stein, Sandra Kengne Kamga Mobou, Jeroen van Kampen, Jolanda Voermans, Aura Timen, Corine GeurtsvanKessel, Annemieke van der Eijk, Richard Molenkamp, Marion Koopmans, on behalf of the Dutch national COVID-19 response team.                                                                                                                               |
| EPI_ISL_525428                                                                                                                                                                 | Oman-National Influenza Center                                                              | Biotechnology & OMICs Laboratory                                           | Sajjad Asaf, Samiha Al-Kharusi, Ahmed Al-Harrasi, Samira Al-Mahruqi, Adil Khan, Ahmed Al-Rawahi, Abdul Latif Khan, Amina Al-Jardani, Hanan Al-Kindi, Intisar Al-Shukri, Ahlam Al-Amri, Aisha Al-Amri, Aisha Al-Busaidi, Adil Al-Wahaibi, Seif Al-Abri.                                                                                                                                                                                                                                                                                                                                                  |
| EPI_ISL_525429                                                                                                                                                                 | Oman-National Influenza Center                                                              | Biotechnology & OMICs Laboratory                                           | Samira Al-Mahruqi, Abdul Latif Khan, Samiha Al-Kharusi, Adil Khan, Ahmed Al-Rawahi, Sajjad Asaf, Amina Al-Jardani, Hanan Al-Kindi, Intisar Al-Shukri, Adil Al-Wahaibi, Seif Al-Abri, Ahmed Al-Harrasi                                                                                                                                                                                                                                                                                                                                                                                                   |
| EPI_ISL_525466                                                                                                                                                                 | Oman-National Influenza Center                                                              | Biotechnology & OMICs Laboratory                                           | Samiha Al-Kharusi, Sajjad Asaf, Abdul Latif Khan, Samira Al-Mahruqi, Adil Khan, Ahmed Al-Rawahi, Amina Al-Jardani, Hanan Al-Kindi, Intisar Al-Shukri, Aisha Al-Busaidi, Adil Al-Wahaibi, Seif Al-Abri, Ahmed Al-Harrasi                                                                                                                                                                                                                                                                                                                                                                                 |
| EPI_ISL_525481                                                                                                                                                                 | Centre for Dengue Research                                                                  | Centre for Dengue Research                                                 | Chandima Jeewandara, Deshni Jayathilaka, Dinuka Ariyaratne, Laksiri Gomes, Diyanath Ranasinghe, Ananda Wijewickrama, Eranga Narangoda, Damayanthi Idampitiya, Gathsaurie Neelika Malavige                                                                                                                                                                                                                                                                                                                                                                                                               |
| EPI_ISL_528662, EPI_ISL_529938                                                                                                                                                 | Virginia DCLS                                                                               | Virginia DCLS                                                              | Virginia DCLS                                                                                                                                                                                                                                                                                                                                                                                                                                                                                                                                                                                           |
| EPI_ISL_534238                                                                                                                                                                 | Lanssjukhuset Kalmar                                                                        | The Public Health Agency of Sweden                                         | Anna-Malin Linde, Maria Lind Karlberg, Mattias Haukland, Reza Advani, Olov Svartstrom, Oskar Karlsson Lindsjo, Sandra Broddesson, Petra Edquist, Mia Brytting, Anna Risberg, Karin Tegmark-Wisell                                                                                                                                                                                                                                                                                                                                                                                                       |
| EPI_ISL_536434                                                                                                                                                                 | National Public Health Laboratory, National Centre for Infectious Diseases                  | National Public Health Laboratory, National Centre for Infectious Diseases | Mak TM, Octavia S, Zhou Z, Cui L, Lin RTP                                                                                                                                                                                                                                                                                                                                                                                                                                                                                                                                                               |
| EPI_ISL_539342                                                                                                                                                                 | Viollier AG                                                                                 | Department of Biosystems Science and Engineering, ETH Zürich               | Christian Beisel, Sarah Nadeau, Ivan Topolsky, Pedro Ferreira, Philipp Jablonski, Susana Posada-Céspedes, Tobias Schär, Ina Nissen, Natascha Santacroce, Elodie Burcklen, Christiane Beckmann, Maurice Redondo, Olivier Kobel, Christoph Noppen, Sophie Seidel, Noemie Santamaria de Souza, Niko Beerenwinkel, Tanja Stadler                                                                                                                                                                                                                                                                            |
| EPI_ISL_539787                                                                                                                                                                 | Institute of Microbiology, Universidad San Francisco de Quito                               | Institute of Microbiology, Universidad San Francisco de Quito              | Andrea Macias, Belén Prado-Vivar, Sully Márquez, Juan José Guadalupe, Monica Becerra-Wong, Bernardo Gutiérrez, Verónica Barragán, Patricia Rojas-Silva, Gabriel Trueba, Michelle Grunauer, Paul Cárdenas                                                                                                                                                                                                                                                                                                                                                                                                |
| EPI_ISL_540930                                                                                                                                                                 | Laboratorio de Referencia Nacional de Virus Respiratorios, Instituto Nacional de Salud Peru | Laboratorio de Genómica Microbiana, Universidad Peruana Cayetano Heredia   | Pablo Tsukayama, Alejandra Dávila-Barclay, Luis González, Pedro E. Romero, Brenda Ayzano, Janet Huancachoque, Pool Marcos, Maribel Huaranga, Camila Castillo-Vilcahuaman, Guillermo Salvatierra                                                                                                                                                                                                                                                                                                                                                                                                         |
| EPI_ISL_541173, EPI_ISL_541251                                                                                                                                                 | Florida Bureau of Public Health Laboratories, Florida Department of Health                  | Florida Bureau of Public Health Laboratories, Florida Department of Health | Schmedes,S., Blanton,J.                                                                                                                                                                                                                                                                                                                                                                                                                                                                                                                                                                                 |
| EPI_ISL_547586                                                                                                                                                                 | Civil Hospital, Panchkula                                                                   | CSIR-Institute of Microbial Technology                                     | Kanika Bansal, Sanjeet Kumar, Anu Singh, Debarghya Ghose, Rajesh Kumar Mishra, Dipak Dutta, Sanjeev Khosla, Prabhu B. Patil                                                                                                                                                                                                                                                                                                                                                                                                                                                                             |
| EPI_ISL_547969                                                                                                                                                                 | LabPLUS                                                                                     | Institute of Environmental Science and Research (ESR)                      | Xiaoyun Ren, Matt Storey, Nikki Freed, Muhammad Faisal, Jing Wang, Hermes Perez, Anja Werno, Antje van der Linden, Arlo Upton, Chris Mansell, David Hammer, Dragana Drinkovic, Gary McAuliffe, Hana Sofia Andersson, James Ussher, Jill Sherwood, Josh Freeman, Julia Howard, Juliet Elvy, Mary DeAlmeida, Matt Blakiston, Matthew Rogers, Max Bloomfield, Michael Addidle, Michelle Balm, Sally Roberts, Sarah Jefferies, Sharmini Muttaiyah, Susan Morpeth, Susan Taylor, Timothy Blackmore, Vani Sathyendran, Veronica Playle, Virginia Hope, Erasmus Smit, Lauren Jelly, Olin Silander, Joep de Lig |
| EPI_ISL_547970, EPI_ISL_547971, EPI_ISL_547972, EPI_ISL_547973, EPI_ISL_547974, EPI_ISL_547975                                                                                 | LabTests                                                                                    | Institute of Environmental Science and Research (ESR)                      | Xiaoyun Ren, Matt Storey, Nikki Freed, Muhammad Faisal, Jing Wang, Hermes Perez, Anja Werno, Antje van der Linden, Arlo Upton, Chris Mansell, David Hammer, Dragana Drinkovic, Gary McAuliffe, Hana Sofia Andersson, James Ussher, Jill Sherwood, Josh Freeman, Julia Howard, Juliet Elvy, Mary DeAlmeida, Matt Blakiston, Matthew Rogers, Max Bloomfield, Michael Addidle, Michelle Balm, Sally Roberts, Sarah Jefferies, Sharmini Muttaiyah, Susan Morpeth, Susan Taylor, Timothy Blackmore, Vani Sathyendran, Veronica Playle, Virginia Hope, Erasmus Smit, Lauren Jelly, Olin Silander, Joep de Lig |
| EPI_ISL_547976                                                                                                                                                                 | LabPLUS                                                                                     | Institute of Environmental Science and Research (ESR)                      | Xiaoyun Ren, Matt Storey, Nikki Freed, Muhammad Faisal, Jing Wang, Hermes Perez, Anja Werno, Antje van der Linden, Arlo Upton, Chris Mansell, David Hammer, Dragana Drinkovic, Gary McAuliffe, Hana Sofia Andersson, James Ussher, Jill Sherwood, Josh Freeman, Julia Howard, Juliet Elvy, Mary DeAlmeida, Matt Blakiston, Matthew Rogers, Max Bloomfield, Michael Addidle, Michelle Balm, Sally Roberts, Sarah Jefferies, Sharmini Muttaiyah, Susan Morpeth, Susan Taylor, Timothy Blackmore, Vani Sathyendran, Veronica Playle, Virginia Hope, Erasmus Smit, Lauren Jelly, Olin Silander, Joep de Lig |
| EPI_ISL_547977                                                                                                                                                                 | LabTests                                                                                    | Institute of Environmental Science and Research (ESR)                      | Xiaoyun Ren, Matt Storey, Nikki Freed, Muhammad Faisal, Jing Wang, Hermes Perez, Anja Werno, Antje van der Linden, Arlo Upton, Chris Mansell, David Hammer, Dragana Drinkovic, Gary McAuliffe, Hana Sofia Andersson, James Ussher, Jill Sherwood, Josh Freeman, Julia Howard, Juliet Elvy, Mary DeAlmeida, Matt Blakiston, Matthew Rogers, Max Bloomfield, Michael Addidle, Michelle Balm, Sally Roberts, Sarah Jefferies, Sharmini Muttaiyah, Susan Morpeth, Susan Taylor, Timothy Blackmore, Vani Sathyendran, Veronica Playle, Virginia Hope, Erasmus Smit, Lauren Jelly, Olin Silander, Joep de Lig |
| EPI_ISL_547978, EPI_ISL_547979                                                                                                                                                 | LabPLUS                                                                                     | Institute of Environmental Science and Research (ESR)                      | Xiaoyun Ren, Matt Storey, Nikki Freed, Muhammad Faisal, Jing Wang, Hermes Perez, Anja Werno, Antje van der Linden, Arlo Upton, Chris Mansell, David Hammer, Dragana Drinkovic, Gary McAuliffe, Hana Sofia Andersson, James Ussher, Jill Sherwood, Josh Freeman, Julia Howard, Juliet Elvy, Mary DeAlmeida, Matt Blakiston, Matthew Rogers, Max Bloomfield, Michael Addidle, Michelle Balm, Sally Roberts, Sarah Jefferies, Sharmini Muttaiyah, Susan Morpeth, Susan Taylor, Timothy Blackmore, Vani Sathyendran, Veronica Playle, Virginia Hope, Erasmus Smit, Lauren Jelly, Olin Silander, Joep de Lig |
| EPI_ISL_547980, EPI_ISL_547981, EPI_ISL_547982, EPI_ISL_547984, EPI_ISL_547985                                                                                                 | Canterbury Health Laboratories                                                              | Institute of Environmental Science and Research (ESR)                      | Xiaoyun Ren, Matt Storey, Nikki Freed, Muhammad Faisal, Jing Wang, Hermes Perez, Anja Werno, Antje van der Linden, Arlo Upton, Chris Mansell, David Hammer, Dragana Drinkovic, Gary McAuliffe, Hana Sofia Andersson, James Ussher, Jill Sherwood, Josh Freeman, Julia Howard, Juliet Elvy, Mary DeAlmeida, Matt Blakiston, Matthew Rogers, Max Bloomfield, Michael Addidle, Michelle Balm, Sally Roberts, Sarah Jefferies, Sharmini Muttaiyah, Susan Morpeth, Susan Taylor, Timothy Blackmore, Vani Sathyendran, Veronica Playle, Virginia Hope, Erasmus Smit, Lauren Jelly, Olin Silander, Joep de Lig |
| EPI_ISL_547986, EPI_ISL_547987, EPI_ISL_547988, EPI_ISL_547989                                                                                                                 | LabTests                                                                                    | Institute of Environmental Science and Research (ESR)                      | Xiaoyun Ren, Matt Storey, Nikki Freed, Muhammad Faisal, Jing Wang, Hermes Perez, Anja Werno, Antje van der Linden, Arlo Upton, Chris Mansell, David Hammer, Dragana Drinkovic, Gary McAuliffe, Hana Sofia Andersson, James Ussher, Jill Sherwood, Josh Freeman, Julia Howard, Juliet Elvy, Mary DeAlmeida, Matt Blakiston, Matthew Rogers, Max Bloomfield, Michael Addidle, Michelle Balm, Sally Roberts, Sarah Jefferies, Sharmini Muttaiyah, Susan Morpeth, Susan Taylor, Timothy Blackmore, Vani Sathyendran, Veronica Playle, Virginia Hope, Erasmus Smit, Lauren Jelly, Olin Silander, Joep de Lig |
| EPI_ISL_547990, EPI_ISL_547991, EPI_ISL_547992                                                                                                                                 | LabPLUS                                                                                     | Institute of Environmental Science and Research (ESR)                      | Xiaoyun Ren, Matt Storey, Nikki Freed, Muhammad Faisal, Jing Wang, Hermes Perez, Anja Werno, Antje van der Linden, Arlo Upton, Chris Mansell, David Hammer, Dragana Drinkovic, Gary McAuliffe, Hana Sofia Andersson, James Ussher, Jill Sherwood, Josh Freeman, Julia Howard, Juliet Elvy, Mary DeAlmeida, Matt Blakiston, Matthew Rogers, Max Bloomfield, Michael Addidle, Michelle Balm, Sally Roberts, Sarah Jefferies, Sharmini Muttaiyah, Susan Morpeth, Susan Taylor, Timothy Blackmore, Vani Sathyendran, Veronica Playle, Virginia Hope, Erasmus Smit, Lauren Jelly, Olin Silander, Joep de Lig |
| EPI_ISL_547993, EPI_ISL_547994, EPI_ISL_547995                                                                                                                                 | LabTests                                                                                    | Institute of Environmental Science and Research (ESR)                      | Xiaoyun Ren, Matt Storey, Nikki Freed, Muhammad Faisal, Jing Wang, Hermes Perez, Anja Werno, Antje van der Linden, Arlo Upton, Chris Mansell, David Hammer, Dragana Drinkovic, Gary McAuliffe, Hana Sofia Andersson, James Ussher, Jill Sherwood, Josh Freeman, Julia Howard, Juliet Elvy, Mary DeAlmeida, Matt Blakiston, Matthew Rogers, Max Bloomfield, Michael Addidle, Michelle Balm, Sally Roberts, Sarah Jefferies, Sharmini Muttaiyah, Susan Morpeth, Susan Taylor, Timothy Blackmore, Vani Sathyendran, Veronica Playle, Virginia Hope, Erasmus Smit, Lauren Jelly, Olin Silander, Joep de Lig |
| EPI_ISL_547997, EPI_ISL_547999, EPI_ISL_548000                                                                                                                                 | LabPLUS                                                                                     | Institute of Environmental Science and Research (ESR)                      | Xiaoyun Ren, Matt Storey, Nikki Freed, Muhammad Faisal, Jing Wang, Hermes Perez, Anja Werno, Antje van der Linden, Arlo Upton, Chris Mansell, David Hammer, Dragana Drinkovic, Gary McAuliffe, Hana Sofia Andersson, James Ussher, Jill Sherwood, Josh Freeman, Julia Howard, Juliet Elvy, Mary DeAlmeida, Matt Blakiston, Matthew Rogers, Max Bloomfield, Michael Addidle, Michelle Balm, Sally Roberts, Sarah Jefferies, Sharmini Muttaiyah, Susan Morpeth, Susan Taylor, Timothy Blackmore, Vani Sathyendran, Veronica Playle, Virginia Hope, Erasmus Smit, Lauren Jelly, Olin Silander, Joep de Lig |
| EPI_ISL_548001, EPI_ISL_548002, EPI_ISL_548003, EPI_ISL_548004, EPI_ISL_548006, EPI_ISL_548007, EPI_ISL_548008, EPI_ISL_548009, EPI_ISL_548010, EPI_ISL_548011, EPI_ISL_548012 | see above                                                                                   | Middlemore Hospital                                                        | Institute of Environmental Science and Research (ESR)                                                                                                                                                                                                                                                                                                                                                                                                                                                                                                                                                   |
|                                                                                                                                                                                |                                                                                             |                                                                            | Xiaoyun Ren, Matt Storey, Nikki Freed, Muhammad Faisal, Jing Wang, Hermes Perez, Anja Werno, Antje van der Linden, Arlo Upton, Chris Mansell, David Hammer, Dragana Drinkovic, Gary McAuliffe, Hana Sofia Andersson, James Ussher, Jill Sherwood, Josh Freeman, Julia Howard, Juliet Elvy, Mary DeAlmeida, Matt Blakiston, Matthew Rogers, Max Bloomfield, Michael Addidle, Michelle Balm, Sally Roberts, Sarah Jefferies, Sharmini Muttaiyah, Susan Morpeth, Susan Taylor, Timothy Blackmore, Vani Sathyendran, Veronica Playle, Virginia Hope, Erasmus Smit, Lauren Jelly, Olin Silander, Joep de Lig |



|                                                                                                                                                                |                                                                                                                                  |                                                                                                                                                                                                                                                                                                                                                                                                                                                                                                                                                          |                                                                                                                                                                                                                                                                                                                                                                                                                                                                                                                                                                                                         |
|----------------------------------------------------------------------------------------------------------------------------------------------------------------|----------------------------------------------------------------------------------------------------------------------------------|----------------------------------------------------------------------------------------------------------------------------------------------------------------------------------------------------------------------------------------------------------------------------------------------------------------------------------------------------------------------------------------------------------------------------------------------------------------------------------------------------------------------------------------------------------|---------------------------------------------------------------------------------------------------------------------------------------------------------------------------------------------------------------------------------------------------------------------------------------------------------------------------------------------------------------------------------------------------------------------------------------------------------------------------------------------------------------------------------------------------------------------------------------------------------|
|                                                                                                                                                                |                                                                                                                                  |                                                                                                                                                                                                                                                                                                                                                                                                                                                                                                                                                          | Hammer, Dragana Drinkovic, Gary McAuliffe, Hana Sofia Andersson, James Ussher, Jill Sherwood, Josh Freeman, Julia Howard, Juliet Elvy, Mary DeAlmeida, Matt Blakiston, Matthew Rogers, Max Bloomfield, Michael Addidle, Michelle Balm, Sally Roberts, Sarah Jefferies, Sharmini Muttaiyah, Susan Morpeth, Susan Taylor, Timothy Blackmore, Vani Sathyendran, Veronica Playle, Virginia Hope, Erasmus Smit, Lauren Jelly, Olin Silander, Joep de Lig                                                                                                                                                     |
| EPI_ISL_548083, EPI_ISL_548084, EPI_ISL_548086, EPI_ISL_548087, EPI_ISL_548088, EPI_ISL_548089, EPI_ISL_548090, EPI_ISL_548091, EPI_ISL_548092, EPI_ISL_548093 | LabPLUS                                                                                                                          | Institute of Environmental Science and Research (ESR)                                                                                                                                                                                                                                                                                                                                                                                                                                                                                                    | Xiaoyun Ren, Matt Storey, Nikki Freed, Muhammad Faisal, Jing Wang, Hermes Perez, Anja Werno, Antje van der Linden, Arlo Upton, Chris Mansell, David Hammer, Dragana Drinkovic, Gary McAuliffe, Hana Sofia Andersson, James Ussher, Jill Sherwood, Josh Freeman, Julia Howard, Juliet Elvy, Mary DeAlmeida, Matt Blakiston, Matthew Rogers, Max Bloomfield, Michael Addidle, Michelle Balm, Sally Roberts, Sarah Jefferies, Sharmini Muttaiyah, Susan Morpeth, Susan Taylor, Timothy Blackmore, Vani Sathyendran, Veronica Playle, Virginia Hope, Erasmus Smit, Lauren Jelly, Olin Silander, Joep de Lig |
| EPI_ISL_548094, EPI_ISL_548095, EPI_ISL_548096, EPI_ISL_548097                                                                                                 | Middlemore Hospital                                                                                                              | Institute of Environmental Science and Research (ESR)                                                                                                                                                                                                                                                                                                                                                                                                                                                                                                    | Xiaoyun Ren, Matt Storey, Nikki Freed, Muhammad Faisal, Jing Wang, Hermes Perez, Anja Werno, Antje van der Linden, Arlo Upton, Chris Mansell, David Hammer, Dragana Drinkovic, Gary McAuliffe, Hana Sofia Andersson, James Ussher, Jill Sherwood, Josh Freeman, Julia Howard, Juliet Elvy, Mary DeAlmeida, Matt Blakiston, Matthew Rogers, Max Bloomfield, Michael Addidle, Michelle Balm, Sally Roberts, Sarah Jefferies, Sharmini Muttaiyah, Susan Morpeth, Susan Taylor, Timothy Blackmore, Vani Sathyendran, Veronica Playle, Virginia Hope, Erasmus Smit, Lauren Jelly, Olin Silander, Joep de Lig |
| EPI_ISL_548098, EPI_ISL_548099, EPI_ISL_548100                                                                                                                 | North Shore Hospital                                                                                                             | Institute of Environmental Science and Research (ESR)                                                                                                                                                                                                                                                                                                                                                                                                                                                                                                    | Xiaoyun Ren, Matt Storey, Nikki Freed, Muhammad Faisal, Jing Wang, Hermes Perez, Anja Werno, Antje van der Linden, Arlo Upton, Chris Mansell, David Hammer, Dragana Drinkovic, Gary McAuliffe, Hana Sofia Andersson, James Ussher, Jill Sherwood, Josh Freeman, Julia Howard, Juliet Elvy, Mary DeAlmeida, Matt Blakiston, Matthew Rogers, Max Bloomfield, Michael Addidle, Michelle Balm, Sally Roberts, Sarah Jefferies, Sharmini Muttaiyah, Susan Morpeth, Susan Taylor, Timothy Blackmore, Vani Sathyendran, Veronica Playle, Virginia Hope, Erasmus Smit, Lauren Jelly, Olin Silander, Joep de Lig |
| EPI_ISL_548101, EPI_ISL_548102                                                                                                                                 | Waikato Hospital                                                                                                                 | Institute of Environmental Science and Research (ESR)                                                                                                                                                                                                                                                                                                                                                                                                                                                                                                    | Xiaoyun Ren, Matt Storey, Nikki Freed, Muhammad Faisal, Jing Wang, Hermes Perez, Anja Werno, Antje van der Linden, Arlo Upton, Chris Mansell, David Hammer, Dragana Drinkovic, Gary McAuliffe, Hana Sofia Andersson, James Ussher, Jill Sherwood, Josh Freeman, Julia Howard, Juliet Elvy, Mary DeAlmeida, Matt Blakiston, Matthew Rogers, Max Bloomfield, Michael Addidle, Michelle Balm, Sally Roberts, Sarah Jefferies, Sharmini Muttaiyah, Susan Morpeth, Susan Taylor, Timothy Blackmore, Vani Sathyendran, Veronica Playle, Virginia Hope, Erasmus Smit, Lauren Jelly, Olin Silander, Joep de Lig |
| EPI_ISL_548103                                                                                                                                                 | Middlemore Hospital                                                                                                              | Institute of Environmental Science and Research (ESR)                                                                                                                                                                                                                                                                                                                                                                                                                                                                                                    | Xiaoyun Ren, Matt Storey, Nikki Freed, Muhammad Faisal, Jing Wang, Hermes Perez, Anja Werno, Antje van der Linden, Arlo Upton, Chris Mansell, David Hammer, Dragana Drinkovic, Gary McAuliffe, Hana Sofia Andersson, James Ussher, Jill Sherwood, Josh Freeman, Julia Howard, Juliet Elvy, Mary DeAlmeida, Matt Blakiston, Matthew Rogers, Max Bloomfield, Michael Addidle, Michelle Balm, Sally Roberts, Sarah Jefferies, Sharmini Muttaiyah, Susan Morpeth, Susan Taylor, Timothy Blackmore, Vani Sathyendran, Veronica Playle, Virginia Hope, Erasmus Smit, Lauren Jelly, Olin Silander, Joep de Lig |
| EPI_ISL_548106, EPI_ISL_548107                                                                                                                                 | LabPLUS                                                                                                                          | Institute of Environmental Science and Research (ESR)                                                                                                                                                                                                                                                                                                                                                                                                                                                                                                    | Xiaoyun Ren, Matt Storey, Nikki Freed, Muhammad Faisal, Jing Wang, Hermes Perez, Anja Werno, Antje van der Linden, Arlo Upton, Chris Mansell, David Hammer, Dragana Drinkovic, Gary McAuliffe, Hana Sofia Andersson, James Ussher, Jill Sherwood, Josh Freeman, Julia Howard, Juliet Elvy, Mary DeAlmeida, Matt Blakiston, Matthew Rogers, Max Bloomfield, Michael Addidle, Michelle Balm, Sally Roberts, Sarah Jefferies, Sharmini Muttaiyah, Susan Morpeth, Susan Taylor, Timothy Blackmore, Vani Sathyendran, Veronica Playle, Virginia Hope, Erasmus Smit, Lauren Jelly, Olin Silander, Joep de Lig |
| EPI_ISL_548116, EPI_ISL_548118                                                                                                                                 | Canterbury Health Laboratories                                                                                                   | Institute of Environmental Science and Research (ESR)                                                                                                                                                                                                                                                                                                                                                                                                                                                                                                    | Xiaoyun Ren, Matt Storey, Nikki Freed, Muhammad Faisal, Jing Wang, Hermes Perez, Anja Werno, Antje van der Linden, Arlo Upton, Chris Mansell, David Hammer, Dragana Drinkovic, Gary McAuliffe, Hana Sofia Andersson, James Ussher, Jill Sherwood, Josh Freeman, Julia Howard, Juliet Elvy, Mary DeAlmeida, Matt Blakiston, Matthew Rogers, Max Bloomfield, Michael Addidle, Michelle Balm, Sally Roberts, Sarah Jefferies, Sharmini Muttaiyah, Susan Morpeth, Susan Taylor, Timothy Blackmore, Vani Sathyendran, Veronica Playle, Virginia Hope, Erasmus Smit, Lauren Jelly, Olin Silander, Joep de Lig |
| EPI_ISL_555195                                                                                                                                                 | Lighthouse Lab in Alderley Park                                                                                                  | Wellcome Sanger Institute for the COVID-19 Genomics UK (COG-UK) consortium                                                                                                                                                                                                                                                                                                                                                                                                                                                                               | The Lighthouse Lab in Alderley Park and Alex Alderton, Roberto Amato, Sonia Goncalves, Ewan Harrison, David K. Jackson, Ian Johnston, Dominic Kwiatkowski, Cordelia Langford, John Sillitoe on behalf of the Wellcome Sanger Institute COVID-19 Surveillance Team                                                                                                                                                                                                                                                                                                                                       |
| EPI_ISL_556289                                                                                                                                                 | Lighthouse Lab in Milton Keynes                                                                                                  | Wellcome Sanger Institute for the COVID-19 Genomics UK (COG-UK) consortium                                                                                                                                                                                                                                                                                                                                                                                                                                                                               | The Lighthouse Lab in Milton Keynes and Alex Alderton, Roberto Amato, Sonia Goncalves, Ewan Harrison, David K. Jackson, Ian Johnston, Dominic Kwiatkowski, Cordelia Langford, John Sillitoe on behalf of the Wellcome Sanger Institute COVID-19 Surveillance Team ( <a href="http://www.sanger.ac.uk/covid-team">http://www.sanger.ac.uk/covid-team</a> )                                                                                                                                                                                                                                               |
| EPI_ISL_558682                                                                                                                                                 | Lighthouse Lab in Alderley Park                                                                                                  | Wellcome Sanger Institute for the COVID-19 Genomics UK (COG-UK) consortium                                                                                                                                                                                                                                                                                                                                                                                                                                                                               | The Lighthouse Lab in Alderley Park and Alex Alderton, Roberto Amato, Sonia Goncalves, Ewan Harrison, David K. Jackson, Ian Johnston, Dominic Kwiatkowski, Cordelia Langford, John Sillitoe on behalf of the Wellcome Sanger Institute COVID-19 Surveillance Team                                                                                                                                                                                                                                                                                                                                       |
| EPI_ISL_559147                                                                                                                                                 | Lighthouse Lab in Milton Keynes                                                                                                  | Wellcome Sanger Institute for the COVID-19 Genomics UK (COG-UK) consortium                                                                                                                                                                                                                                                                                                                                                                                                                                                                               | The Lighthouse Lab in Milton Keynes and Alex Alderton, Roberto Amato, Sonia Goncalves, Ewan Harrison, David K. Jackson, Ian Johnston, Dominic Kwiatkowski, Cordelia Langford, John Sillitoe on behalf of the Wellcome Sanger Institute COVID-19 Surveillance Team ( <a href="http://www.sanger.ac.uk/covid-team">http://www.sanger.ac.uk/covid-team</a> )                                                                                                                                                                                                                                               |
| EPI_ISL_560981                                                                                                                                                 | Capio S:t Gorans sjukhus                                                                                                         | The Public Health Agency of Sweden                                                                                                                                                                                                                                                                                                                                                                                                                                                                                                                       | Anna-Malin Linde, Maria Lind Karlberg, Mattias Haukland, Reza Advani, Olov Svartstrom, Oskar Karlsson Lindsjo, Sandra Broddesson, Petra Edquist, Mia Brytting, Anna Risberg, Karin Tegmark-Wisell                                                                                                                                                                                                                                                                                                                                                                                                       |
| EPI_ISL_561230                                                                                                                                                 | MRCG at LSHTM Genomics lab                                                                                                       | MRCG at LSHTM Genomics lab                                                                                                                                                                                                                                                                                                                                                                                                                                                                                                                               | Abdul Karim sesay, Abdoulie Kante, Jarra Manneh, Mariama Kujabi, Bakary Sanyang                                                                                                                                                                                                                                                                                                                                                                                                                                                                                                                         |
| EPI_ISL_561338, EPI_ISL_561342                                                                                                                                 | Civil Hospital, Panchkula                                                                                                        | CSIR-Institute of Microbial Technology                                                                                                                                                                                                                                                                                                                                                                                                                                                                                                                   | Kanika Bansal, Sanjeet Kumar, Anu Singh, Debarghya Ghose, Rajesh Kumar Mishra, Dipak Dutta, Sanjeev Khosla, Prabhu B. Patil                                                                                                                                                                                                                                                                                                                                                                                                                                                                             |
| EPI_ISL_567809, EPI_ISL_567969                                                                                                                                 | Lighthouse Lab in Alderley Park                                                                                                  | Wellcome Sanger Institute for the COVID-19 Genomics UK (COG-UK) consortium                                                                                                                                                                                                                                                                                                                                                                                                                                                                               | Jacquelyn Wynn, Mairead Hyland, The Lighthouse Lab in Alderley Park and Alex Alderton, Roberto Amato, Sonia Goncalves, Ewan Harrison, David K. Jackson, Ian Johnston, Dominic Kwiatkowski, Cordelia Langford, John Sillitoe on behalf of the Wellcome Sanger Institute COVID-19 Surveillance Team                                                                                                                                                                                                                                                                                                       |
| EPI_ISL_568527                                                                                                                                                 | Laboratorio de Referencia Nacional de Virus Respiratorios, Instituto Nacional de Salud Peru                                      | Laboratorio de Genómica Microbiana, Universidad Peruana Cayetano Heredia                                                                                                                                                                                                                                                                                                                                                                                                                                                                                 | Pablo Tsukayama, Alejandra Dávila-Barclay, Luis González, Pedro E. Romero, Brenda Ayzanoa, Janet Huancachoque, Pool Marcos, Maribel Huaringa, Camila Castillo-Vilcahuaman, Guillermo Salvatierra                                                                                                                                                                                                                                                                                                                                                                                                        |
| EPI_ISL_568602, EPI_ISL_568610                                                                                                                                 | Florida Bureau of Public Health Laboratories                                                                                     | Florida Bureau of Public Health Laboratories                                                                                                                                                                                                                                                                                                                                                                                                                                                                                                             | Sarah Schmedes, Jason Blanton                                                                                                                                                                                                                                                                                                                                                                                                                                                                                                                                                                           |
| EPI_ISL_569047                                                                                                                                                 | MEPHI, Aix Marseille University                                                                                                  | MEPHI, Aix Marseille University                                                                                                                                                                                                                                                                                                                                                                                                                                                                                                                          | Anthony LEVASSEUR                                                                                                                                                                                                                                                                                                                                                                                                                                                                                                                                                                                       |
| EPI_ISL_573514                                                                                                                                                 | University College London, Great Ormond Street Hospital for Children NHS Foundation Trust, Imperial College Healthcare NHS Trust | COVID-19 Genomics UK (COG-UK) Consortium                                                                                                                                                                                                                                                                                                                                                                                                                                                                                                                 | Sergi Castellano, Rachel Williams, Mark Kristiansen, Paola Resende Silva, Sunando Roy, Tony Brooks, Helena Tutill, Paola Niola, Patricia Dyal, Charlotte Williams, Leysa Forrest, Yasmin Panchbhaya, Jacqueline Findlay, Samuel Weeks, Julianne Brown, Kathryn Harris, Paul Randell, James Price, Alison Holmes, Judith Breuer                                                                                                                                                                                                                                                                          |
| EPI_ISL_574617                                                                                                                                                 | RS Kramat 128                                                                                                                    | Eijkman Institute for Molecular Biology, Ministry of Research and Technology/National Agency for Research and Innovation                                                                                                                                                                                                                                                                                                                                                                                                                                 | Frilasita A Yudhaputri, Edison Johar, Hidayat Trimarsanto, Iskandar A Adnan, Willy Agustine, David H Muljono, Safarina G Malik, Herawati Sudoyo, Khin Saw Myint, Amin Soebandrio                                                                                                                                                                                                                                                                                                                                                                                                                        |
| EPI_ISL_576383                                                                                                                                                 | RSUD Budi Rahayu Kota Magelang                                                                                                   | Genetics Working Group (Pokja Genetik) Faculty of Medicine, Public Health and Nursing Universitas Gadjah Mada (FK-KMK UGM); Disease Investigation Center Wates Ministry of Agriculture Indonesia; Department of Microbiology FK-KMK UGM; Laboratorium Diagnostik Yayasan Tahija World Mosquito Program (WMP) Yogyakarta Center for Tropical Medicine FK-KMK UGM; Integrated Research Center FK-KMK UGM; Department of Computer Science and Electronics FMIPA UGM; Balai Besar Teknik Kesehatan Lingkungan dan Pengendalian Penyakit (BBTKLPP) Yogyakarta | Gunadi, Hendra Wibawa, Marcellus, Mohamad S. Hakim, Edwin W. Daniwijaya, Ludhang P. Rizki, Endah Supriyati, Eggi Arguni, Titik Nuryastuti, Tri Wibawa, Dwi AA Nugrahaningih, Afiahayati, Siswanto, Kristy Iskandar, Nungki Anggorowati, Irene, Indaryati, Havid Setyawan, Ari Meliyanti, Merliana Sari Situmeang, Audric Kenny Tedja, Aditya Rifqi Fauzi                                                                                                                                                                                                                                                |
| EPI_ISL_576556                                                                                                                                                 | Innovative Genomics Institute, UC Berkeley                                                                                       | Innovative Genomics Institute, UC Berkeley                                                                                                                                                                                                                                                                                                                                                                                                                                                                                                               | Stacia Wyman, Haridha Shivram, Phil Frankino, Liana Lareau, Shana McDevitt, Justin Choi                                                                                                                                                                                                                                                                                                                                                                                                                                                                                                                 |
| EPI_ISL_577702                                                                                                                                                 | NIV Influenza                                                                                                                    | NIV Influenza                                                                                                                                                                                                                                                                                                                                                                                                                                                                                                                                            | Potdar V                                                                                                                                                                                                                                                                                                                                                                                                                                                                                                                                                                                                |
| EPI_ISL_578186                                                                                                                                                 | Hospital General Juan Ramón Jiménez                                                                                              | Instituto de Salud Carlos III                                                                                                                                                                                                                                                                                                                                                                                                                                                                                                                            | Iglesias-Caballero, M. Molinero Calamita, M. González-Esguevillas, M. Camarero, S. Pozo, F. Casas, I. Jiménez, P. Jiménez, M. Zaballos, A. Monzón, S. Varona, S. Juliá, M. Cuesta, I, J. Saavedra                                                                                                                                                                                                                                                                                                                                                                                                       |
| EPI_ISL_579058                                                                                                                                                 | LabTests                                                                                                                         | Institute of Environmental Science and Research (ESR)                                                                                                                                                                                                                                                                                                                                                                                                                                                                                                    | Xiaoyun Ren, Matt Storey, Nikki Freed, Muhammad Faisal, Jing Wang, Hermes Perez, Anja Werno, Antje van der Linden, Arlo Upton, Chris Mansell, David Hammer, Dragana Drinkovic, Gary McAuliffe, Hana Sofia Andersson, James Ussher, Jill Sherwood, Josh Freeman, Julia Howard, Juliet Elvy, Mary DeAlmeida, Matt Blakiston, Matthew Rogers, Max Bloomfield, Michael Addidle, Michelle Balm, Sally Roberts, Sarah Jefferies, Sharmini Muttaiyah, Susan Morpeth, Susan Taylor, Timothy Blackmore, Vani Sathyendran, Veronica Playle, Virginia Hope, Erasmus Smit, Lauren Jelly, Olin Silander, Joep de Lig |

|                                                                                |                                                                                                                    |                                                                                       |                                                                                                                                                                                                                                                                                                                                                                                                                                                                                                                                                                                                         |
|--------------------------------------------------------------------------------|--------------------------------------------------------------------------------------------------------------------|---------------------------------------------------------------------------------------|---------------------------------------------------------------------------------------------------------------------------------------------------------------------------------------------------------------------------------------------------------------------------------------------------------------------------------------------------------------------------------------------------------------------------------------------------------------------------------------------------------------------------------------------------------------------------------------------------------|
| EPI_ISL_579092                                                                 | Canterbury Health Laboratories                                                                                     | Institute of Environmental Science and Research (ESR)                                 | Xiaoyun Ren, Matt Storey, Nikki Freed, Muhammad Faisal, Jing Wang, Hermes Perez, Anja Werno, Antje van der Linden, Arlo Upton, Chris Mansell, David Hammer, Dragana Drinkovic, Gary McAuliffe, Hana Sofia Andersson, James Ussher, Jill Sherwood, Josh Freeman, Julia Howard, Juliet Elvy, Mary DeAlmeida, Matt Blakiston, Matthew Rogers, Max Bloomfield, Michael Addidle, Michelle Balm, Sally Roberts, Sarah Jefferies, Sharmini Muttaiyah, Susan Morpeth, Susan Taylor, Timothy Blackmore, Vani Sathyendran, Veronica Playle, Virginia Hope, Erasmus Smit, Lauren Jelly, Olin Silander, Joep de Lig |
| EPI_ISL_579093, EPI_ISL_579094, EPI_ISL_579095, EPI_ISL_579096                 | North Shore Hospital                                                                                               | Institute of Environmental Science and Research (ESR)                                 | Xiaoyun Ren, Matt Storey, Nikki Freed, Muhammad Faisal, Jing Wang, Hermes Perez, Anja Werno, Antje van der Linden, Arlo Upton, Chris Mansell, David Hammer, Dragana Drinkovic, Gary McAuliffe, Hana Sofia Andersson, James Ussher, Jill Sherwood, Josh Freeman, Julia Howard, Juliet Elvy, Mary DeAlmeida, Matt Blakiston, Matthew Rogers, Max Bloomfield, Michael Addidle, Michelle Balm, Sally Roberts, Sarah Jefferies, Sharmini Muttaiyah, Susan Morpeth, Susan Taylor, Timothy Blackmore, Vani Sathyendran, Veronica Playle, Virginia Hope, Erasmus Smit, Lauren Jelly, Olin Silander, Joep de Lig |
| EPI_ISL_579097                                                                 | LabPLUS                                                                                                            | Institute of Environmental Science and Research (ESR)                                 | Xiaoyun Ren, Matt Storey, Nikki Freed, Muhammad Faisal, Jing Wang, Hermes Perez, Anja Werno, Antje van der Linden, Arlo Upton, Chris Mansell, David Hammer, Dragana Drinkovic, Gary McAuliffe, Hana Sofia Andersson, James Ussher, Jill Sherwood, Josh Freeman, Julia Howard, Juliet Elvy, Mary DeAlmeida, Matt Blakiston, Matthew Rogers, Max Bloomfield, Michael Addidle, Michelle Balm, Sally Roberts, Sarah Jefferies, Sharmini Muttaiyah, Susan Morpeth, Susan Taylor, Timothy Blackmore, Vani Sathyendran, Veronica Playle, Virginia Hope, Erasmus Smit, Lauren Jelly, Olin Silander, Joep de Lig |
| EPI_ISL_579099                                                                 | LabTests                                                                                                           | Institute of Environmental Science and Research (ESR)                                 | Xiaoyun Ren, Matt Storey, Nikki Freed, Muhammad Faisal, Jing Wang, Hermes Perez, Anja Werno, Antje van der Linden, Arlo Upton, Chris Mansell, David Hammer, Dragana Drinkovic, Gary McAuliffe, Hana Sofia Andersson, James Ussher, Jill Sherwood, Josh Freeman, Julia Howard, Juliet Elvy, Mary DeAlmeida, Matt Blakiston, Matthew Rogers, Max Bloomfield, Michael Addidle, Michelle Balm, Sally Roberts, Sarah Jefferies, Sharmini Muttaiyah, Susan Morpeth, Susan Taylor, Timothy Blackmore, Vani Sathyendran, Veronica Playle, Virginia Hope, Erasmus Smit, Lauren Jelly, Olin Silander, Joep de Lig |
| EPI_ISL_579103, EPI_ISL_579104                                                 | Middlemore Hospital                                                                                                | Institute of Environmental Science and Research (ESR)                                 | Xiaoyun Ren, Matt Storey, Nikki Freed, Muhammad Faisal, Jing Wang, Hermes Perez, Anja Werno, Antje van der Linden, Arlo Upton, Chris Mansell, David Hammer, Dragana Drinkovic, Gary McAuliffe, Hana Sofia Andersson, James Ussher, Jill Sherwood, Josh Freeman, Julia Howard, Juliet Elvy, Mary DeAlmeida, Matt Blakiston, Matthew Rogers, Max Bloomfield, Michael Addidle, Michelle Balm, Sally Roberts, Sarah Jefferies, Sharmini Muttaiyah, Susan Morpeth, Susan Taylor, Timothy Blackmore, Vani Sathyendran, Veronica Playle, Virginia Hope, Erasmus Smit, Lauren Jelly, Olin Silander, Joep de Lig |
| EPI_ISL_579105, EPI_ISL_579107, EPI_ISL_579108, EPI_ISL_579110, EPI_ISL_579514 | LabPLUS                                                                                                            | Institute of Environmental Science and Research (ESR)                                 | Xiaoyun Ren, Matt Storey, Nikki Freed, Muhammad Faisal, Jing Wang, Hermes Perez, Anja Werno, Antje van der Linden, Arlo Upton, Chris Mansell, David Hammer, Dragana Drinkovic, Gary McAuliffe, Hana Sofia Andersson, James Ussher, Jill Sherwood, Josh Freeman, Julia Howard, Juliet Elvy, Mary DeAlmeida, Matt Blakiston, Matthew Rogers, Max Bloomfield, Michael Addidle, Michelle Balm, Sally Roberts, Sarah Jefferies, Sharmini Muttaiyah, Susan Morpeth, Susan Taylor, Timothy Blackmore, Vani Sathyendran, Veronica Playle, Virginia Hope, Erasmus Smit, Lauren Jelly, Olin Silander, Joep de Lig |
| EPI_ISL_581515                                                                 | Virginia DCLS                                                                                                      | Virginia DCLS                                                                         | Virginia DCLS                                                                                                                                                                                                                                                                                                                                                                                                                                                                                                                                                                                           |
| EPI_ISL_583893                                                                 | Singapore General Hospital                                                                                         | Department of Microbiology                                                            | Nurdyana Abdul Rahman, Kun Lee Lim, Chenhao Li, Sui Sin Goh, Kenneth Xin Long Chan, Kian Sing Chan, Lynette Oon, Kern Rei Chng, Niranjan Nagarajan, Karrie Ko                                                                                                                                                                                                                                                                                                                                                                                                                                           |
| EPI_ISL_584074                                                                 | The National Institute of Public Health                                                                            | State Veterinary Institute Prague                                                     | Nagy,A.;Jirincova,H;Novakova,L;Trnka,D;Vecerova,J                                                                                                                                                                                                                                                                                                                                                                                                                                                                                                                                                       |
| EPI_ISL_587139                                                                 | Lighthouse Lab in Alderley Park                                                                                    | Wellcome Sanger Institute for the COVID-19 Genomics UK (COG-UK) consortium            | Jacquelyn Wynn, Mairead Hyland, The Lighthouse Lab in Alderley Park and Alex Alderton, Roberto Amato, Sonia Goncalves, Ewan Harrison, David K. Jackson, Ian Johnston, Dominic Kwiatkowski, Cordelia Langford, John Sillitoe on behalf of the Wellcome Sanger Institute COVID-19 Surveillance Team                                                                                                                                                                                                                                                                                                       |
| EPI_ISL_589096                                                                 | Lighthouse Lab in Glasgow                                                                                          | Wellcome Sanger Institute for the COVID-19 Genomics UK (COG-UK) consortium            | Harper VanSteenhouse, Yumi Kasai, David Gray, Carol Clugston, Anna Dominiczak and Alex Alderton, Roberto Amato, Sonia Goncalves, Ewan Harrison, David K. Jackson, Ian Johnston, Dominic Kwiatkowski, Cordelia Langford, John Sillitoe on behalf of the Wellcome Sanger Institute COVID-19 Surveillance Team                                                                                                                                                                                                                                                                                             |
| EPI_ISL_594288, EPI_ISL_594289                                                 | Florida Bureau of Public Health Laboratories                                                                       | Florida Bureau of Public Health Laboratories                                          | Sarah Schmedes, Jason Blanton                                                                                                                                                                                                                                                                                                                                                                                                                                                                                                                                                                           |
| EPI_ISL_594985                                                                 | Queens Medical Centre, Clinical Microbiology Department / DeepSeq Nottingham                                       | COVID-19 Genomics UK (COG-UK) Consortium                                              | Gemma Clark, Wendy Smith, Manjinder Khakh, Vicki M Fleming, Michelle M Lister, Hannah Howson-Wells, Jonathan Ball, Patrick McClure, Joseph Chappell, Theocharis Tsoieridis, Nadine Holmes, Matthew Carlisle, Christopher Moore, Fei Sang, Johnny Debebe, Victoria Wright, Matthew Loose                                                                                                                                                                                                                                                                                                                 |
| EPI_ISL_595656                                                                 | Oxford Viroemics, NDM, University of Oxford; Oxford University Hospitals, Basingstoke and North Hampshire Hospital | COVID-19 Genomics UK (COG-UK) Consortium                                              | Tanya Golubchik, David Bonsall, George Macintyre, Amy Trebes, Mariateresa de Cesare, Catrin Moore, Alex Mobbs, Anita Justice, Robert Shaw, Monique Anderson, Timothy Peto, Emma Wise, Nathan Moore, Jessica Lynch, Nick Cortes, Matilde Mori, Stephen Kidd, David Buck, John Todd, Christophe Fraser                                                                                                                                                                                                                                                                                                    |
| EPI_ISL_596287                                                                 | HELIX LCC                                                                                                          | WHO National Influenza Centre Russian Federation                                      | Andrey Komissarov, Artem Fadeev, Anna Ivanova, Kseniya Komissarova, Dmitry Bazhenov, Daria Danilenko                                                                                                                                                                                                                                                                                                                                                                                                                                                                                                    |
| EPI_ISL_596457, EPI_ISL_596458, EPI_ISL_596460, EPI_ISL_596466, EPI_ISL_596470 | National Public Health Laboratory, National Centre for Infectious Diseases                                         | National Public Health Laboratory, National Centre for Infectious Diseases            | Tze Minn Mak, Sophie Octavia, Zhenyang Zhou, Lin Cui, Raymond Tzer Pin Lin                                                                                                                                                                                                                                                                                                                                                                                                                                                                                                                              |
| EPI_ISL_598679                                                                 | Lighthouse Lab in Milton Keynes                                                                                    | Wellcome Sanger Institute for the COVID-19 Genomics UK (COG-UK) consortium            | The Lighthouse Lab in Milton Keynes and Alex Alderton, Roberto Amato, Sonia Goncalves, Ewan Harrison, David K. Jackson, Ian Johnston, Dominic Kwiatkowski, Cordelia Langford, John Sillitoe on behalf of the Wellcome Sanger Institute COVID-19 Surveillance Team ( <a href="http://www.sanger.ac.uk/covid-team">http://www.sanger.ac.uk/covid-team</a> )                                                                                                                                                                                                                                               |
| EPI_ISL_599124, EPI_ISL_600667, EPI_ISL_600676                                 | Lighthouse Lab in Glasgow                                                                                          | Wellcome Sanger Institute for the COVID-19 Genomics UK (COG-UK) consortium            | Harper VanSteenhouse, Yumi Kasai, David Gray, Carol Clugston, Anna Dominiczak and Alex Alderton, Roberto Amato, Sonia Goncalves, Ewan Harrison, David K. Jackson, Ian Johnston, Dominic Kwiatkowski, Cordelia Langford, John Sillitoe on behalf of the Wellcome Sanger Institute COVID-19 Surveillance Team ( <a href="http://www.sanger.ac.uk/covid-team">http://www.sanger.ac.uk/covid-team</a> )                                                                                                                                                                                                     |
| EPI_ISL_601715                                                                 | Lighthouse Lab in Cambridge                                                                                        | Wellcome Sanger Institute for the COVID-19 Genomics UK (COG-UK) consortium            | Rob Howes, The Lighthouse Lab in Cambridge and Alex Alderton, Roberto Amato, Sonia Goncalves, Ewan Harrison, David K. Jackson, Ian Johnston, Dominic Kwiatkowski, Cordelia Langford, John Sillitoe on behalf of the Wellcome Sanger Institute COVID-19 Surveillance Team ( <a href="http://www.sanger.ac.uk/covid-team">http://www.sanger.ac.uk/covid-team</a> )                                                                                                                                                                                                                                        |
| EPI_ISL_602439                                                                 | HELIX LLC                                                                                                          | WHO National Influenza Centre Russian Federation                                      | Andrey Komissarov, Artem Fadeev, Kseniya Komissarova, Anna Ivanova, Dmitry Bazhenov, Daria Danilenko                                                                                                                                                                                                                                                                                                                                                                                                                                                                                                    |
| EPI_ISL_602823, EPI_ISL_602843, EPI_ISL_602893                                 | NHLS-IALCH                                                                                                         | KRISP, KZN Research Innovation and Sequencing Platform                                | Giandhari J, Pillay S, Lessells R, Mdlalose K, York D, Khan S, Tegally H, Wilkinson E, de Oliveira T                                                                                                                                                                                                                                                                                                                                                                                                                                                                                                    |
| EPI_ISL_605831                                                                 | PathWest Laboratory Medicine WA                                                                                    | PathWest Laboratory Medicine WA Microbial Surveillance Unit                           | PathWest Laboratory Medicine WA Microbial Surveillance Unit                                                                                                                                                                                                                                                                                                                                                                                                                                                                                                                                             |
| EPI_ISL_606375, EPI_ISL_606424                                                 | Lighthouse Lab in Milton Keynes                                                                                    | Wellcome Sanger Institute for the COVID-19 Genomics UK (COG-UK) consortium            | The Lighthouse Lab in Milton Keynes and Alex Alderton, Roberto Amato, Sonia Goncalves, Ewan Harrison, David K. Jackson, Ian Johnston, Dominic Kwiatkowski, Cordelia Langford, John Sillitoe on behalf of the Wellcome Sanger Institute COVID-19 Surveillance Team                                                                                                                                                                                                                                                                                                                                       |
| EPI_ISL_609573                                                                 | Lighthouse Lab in Cambridge                                                                                        | Wellcome Sanger Institute for the COVID-19 Genomics UK (COG-UK) consortium            | Rob Howes, The Lighthouse Lab in Cambridge and Alex Alderton, Roberto Amato, Sonia Goncalves, Ewan Harrison, David K. Jackson, Ian Johnston, Dominic Kwiatkowski, Cordelia Langford, John Sillitoe on behalf of the Wellcome Sanger Institute COVID-19 Surveillance Team                                                                                                                                                                                                                                                                                                                                |
| EPI_ISL_610200                                                                 | Department of Health Technology and Informatics, The Hong Kong Polytechnic University                              | Department of Health Technology and Informatics, The Hong Kong Polytechnic University | Siu,G.K.-H., Lee,L.-K., Leung,K.S.-S., Leung,J.S.-L., Ng,T.T.-L., Chan,C.T.-M., Tam,K.K.-G., Lao,H.-Y., Wu,A.K.-L., Yau,M.C.-Y., Lai,Y.W.-M., Fung,K.S.-C., Chau,S.K.-Y., Wong,B.K.-C., To,W.-K., Luk,K., Ho,A.Y.-M., Que,T.-L., Yip,K.-T., Yam,W.C., Shum,D.H.-K., Yip,S.P.                                                                                                                                                                                                                                                                                                                            |
| EPI_ISL_612222                                                                 | University of Birmingham                                                                                           | COVID-19 Genomics UK (COG-UK) Consortium                                              | Institute of Microbiology, University of Birmingham: Claire McMurray, Joanne Stockton, Samuel Nicholls, Radoslaw Poplanski, Will Rowe, Josh Quick, Nicholas Loman. University of Birmingham Testing Laboratory: Celina M Whalley, Andrew Bosworth, Charlotte Poxon, Kasun Wanigasooriya, Oliver Pickles, Mike Kidd, Alex Richter, Andrew D Beggs PHE Heartlands Lab: Husam Osman, Andrew Bosworth. Queen Elizabeth Hospital: Anna Casey                                                                                                                                                                 |
| EPI_ISL_613889                                                                 | Florida Bureau of Public Health Laboratories                                                                       | Florida Bureau of Public Health Laboratories                                          | Sarah Schmedes, Jason Blanton                                                                                                                                                                                                                                                                                                                                                                                                                                                                                                                                                                           |
| EPI_ISL_614128                                                                 | Virginia DCLS                                                                                                      | Virginia DCLS                                                                         | Virginia DCLS                                                                                                                                                                                                                                                                                                                                                                                                                                                                                                                                                                                           |
| EPI_ISL_614252, EPI_ISL_614256                                                 | Wyoming Public Health Laboratory                                                                                   | Center for Global Health, University of New Mexico Health Sciences Center             | Daryl Domman, Kurt Schwalm, Rob Christensen, Wanda Manley, Cari Sloma, Noah Hull, Darrell Dinwiddie                                                                                                                                                                                                                                                                                                                                                                                                                                                                                                     |
| EPI_ISL_614395                                                                 | Molecular diagnostic unit for viral haemorrhagic fevers and emerging viruses, Bouaké CHU Laboratory                | Project group Epidemiology of Highly Pathogenic Microorganisms, Robert Koch-Institute | Chantal Akoua-Koffi, Diané Bamourou, Etilé Anoh, Essia Belarbi, Safiatou Karidioula, Grit Schubert, Adjaratou Traoré, Soundélé Maité, Monemo Pacome, Coulibaly Mbegnang, Bamba Fatoumata Touré, Kra Ouffoué, Fabian Leendertz                                                                                                                                                                                                                                                                                                                                                                           |
| EPI_ISL_614997, EPI_ISL_615017,                                                | Microbiology, Department of Pathology, St. Bernard's                                                               | Respiratory Virus Unit, Microbiology Services Colindale,                              | PHE Covid Sequencing Team, Dr Nicholas Cortes (Gibraltar), Charlotte Gillborn-Jones (Gibraltar)                                                                                                                                                                                                                                                                                                                                                                                                                                                                                                         |

|                                                                                                                                                                                |                                                                                                   |                                                                                                                      |                                                                                                                                                                                                                                                                                                                                                                                                                                                                                                                                                                                                         |
|--------------------------------------------------------------------------------------------------------------------------------------------------------------------------------|---------------------------------------------------------------------------------------------------|----------------------------------------------------------------------------------------------------------------------|---------------------------------------------------------------------------------------------------------------------------------------------------------------------------------------------------------------------------------------------------------------------------------------------------------------------------------------------------------------------------------------------------------------------------------------------------------------------------------------------------------------------------------------------------------------------------------------------------------|
| EPI_ISL_615028                                                                                                                                                                 | Hospital, Gibraltar Health Authority                                                              | Public Health England                                                                                                |                                                                                                                                                                                                                                                                                                                                                                                                                                                                                                                                                                                                         |
| EPI_ISL_617490, EPI_ISL_619495, EPI_ISL_619725, EPI_ISL_622099                                                                                                                 | Department of Virus and Microbiological Special Diagnostics, Statens Serum Institut, Denmark      | Albertsen lab, Department of Chemistry and Bioscience, Aalborg University, Denmark                                   | Danish Covid-19 Genome Consortia                                                                                                                                                                                                                                                                                                                                                                                                                                                                                                                                                                        |
| EPI_ISL_622768, EPI_ISL_622769, EPI_ISL_622770, EPI_ISL_622771, EPI_ISL_622775                                                                                                 | Canterbury Health Laboratories                                                                    | Institute of Environmental Science and Research (ESR)                                                                | Xiaoyun Ren, Matt Storey, Nikki Freed, Muhammad Faisal, Jing Wang, Hermes Perez, Anja Werno, Antje van der Linden, Arlo Upton, Chris Mansell, David Hammer, Dragana Drinkovic, Gary McAuliffe, Hana Sofia Andersson, James Ussher, Jill Sherwood, Josh Freeman, Julia Howard, Juliet Elvy, Mary DeAlmeida, Matt Blakiston, Matthew Rogers, Max Bloomfield, Michael Addidle, Michelle Balm, Sally Roberts, Sarah Jefferies, Sharmini Muttaiyah, Susan Morpeth, Susan Taylor, Timothy Blackmore, Vani Sathyendran, Veronica Playle, Virginia Hope, Erasmus Smit, Lauren Jelly, Olin Silander, Joep de Lig |
| EPI_ISL_622776                                                                                                                                                                 | Middlemore Hospital                                                                               | Institute of Environmental Science and Research (ESR)                                                                | Xiaoyun Ren, Matt Storey, Nikki Freed, Muhammad Faisal, Jing Wang, Hermes Perez, Anja Werno, Antje van der Linden, Arlo Upton, Chris Mansell, David Hammer, Dragana Drinkovic, Gary McAuliffe, Hana Sofia Andersson, James Ussher, Jill Sherwood, Josh Freeman, Julia Howard, Juliet Elvy, Mary DeAlmeida, Matt Blakiston, Matthew Rogers, Max Bloomfield, Michael Addidle, Michelle Balm, Sally Roberts, Sarah Jefferies, Sharmini Muttaiyah, Susan Morpeth, Susan Taylor, Timothy Blackmore, Vani Sathyendran, Veronica Playle, Virginia Hope, Erasmus Smit, Lauren Jelly, Olin Silander, Joep de Lig |
| EPI_ISL_622778                                                                                                                                                                 | LabTests                                                                                          | Institute of Environmental Science and Research (ESR)                                                                | Xiaoyun Ren, Matt Storey, Nikki Freed, Muhammad Faisal, Jing Wang, Hermes Perez, Anja Werno, Antje van der Linden, Arlo Upton, Chris Mansell, David Hammer, Dragana Drinkovic, Gary McAuliffe, Hana Sofia Andersson, James Ussher, Jill Sherwood, Josh Freeman, Julia Howard, Juliet Elvy, Mary DeAlmeida, Matt Blakiston, Matthew Rogers, Max Bloomfield, Michael Addidle, Michelle Balm, Sally Roberts, Sarah Jefferies, Sharmini Muttaiyah, Susan Morpeth, Susan Taylor, Timothy Blackmore, Vani Sathyendran, Veronica Playle, Virginia Hope, Erasmus Smit, Lauren Jelly, Olin Silander, Joep de Lig |
| EPI_ISL_622780, EPI_ISL_622781, EPI_ISL_622782, EPI_ISL_622784, EPI_ISL_622786, EPI_ISL_622789, EPI_ISL_622791                                                                 | Canterbury Health Laboratories                                                                    | Institute of Environmental Science and Research (ESR)                                                                | Xiaoyun Ren, Matt Storey, Nikki Freed, Muhammad Faisal, Jing Wang, Hermes Perez, Anja Werno, Antje van der Linden, Arlo Upton, Chris Mansell, David Hammer, Dragana Drinkovic, Gary McAuliffe, Hana Sofia Andersson, James Ussher, Jill Sherwood, Josh Freeman, Julia Howard, Juliet Elvy, Mary DeAlmeida, Matt Blakiston, Matthew Rogers, Max Bloomfield, Michael Addidle, Michelle Balm, Sally Roberts, Sarah Jefferies, Sharmini Muttaiyah, Susan Morpeth, Susan Taylor, Timothy Blackmore, Vani Sathyendran, Veronica Playle, Virginia Hope, Erasmus Smit, Lauren Jelly, Olin Silander, Joep de Lig |
| EPI_ISL_622793                                                                                                                                                                 | LabTests                                                                                          | Institute of Environmental Science and Research (ESR)                                                                | Xiaoyun Ren, Matt Storey, Nikki Freed, Muhammad Faisal, Jing Wang, Hermes Perez, Anja Werno, Antje van der Linden, Arlo Upton, Chris Mansell, David Hammer, Dragana Drinkovic, Gary McAuliffe, Hana Sofia Andersson, James Ussher, Jill Sherwood, Josh Freeman, Julia Howard, Juliet Elvy, Mary DeAlmeida, Matt Blakiston, Matthew Rogers, Max Bloomfield, Michael Addidle, Michelle Balm, Sally Roberts, Sarah Jefferies, Sharmini Muttaiyah, Susan Morpeth, Susan Taylor, Timothy Blackmore, Vani Sathyendran, Veronica Playle, Virginia Hope, Erasmus Smit, Lauren Jelly, Olin Silander, Joep de Lig |
| EPI_ISL_622809, EPI_ISL_622810, EPI_ISL_622811, EPI_ISL_622812, EPI_ISL_622813, EPI_ISL_622824, EPI_ISL_622825, EPI_ISL_622827, EPI_ISL_622828, EPI_ISL_622829, EPI_ISL_622830 | Canterbury Health Laboratories                                                                    | Institute of Environmental Science and Research (ESR)                                                                | Xiaoyun Ren, Matt Storey, Nikki Freed, Muhammad Faisal, Jing Wang, Hermes Perez, Anja Werno, Antje van der Linden, Arlo Upton, Chris Mansell, David Hammer, Dragana Drinkovic, Gary McAuliffe, Hana Sofia Andersson, James Ussher, Jill Sherwood, Josh Freeman, Julia Howard, Juliet Elvy, Mary DeAlmeida, Matt Blakiston, Matthew Rogers, Max Bloomfield, Michael Addidle, Michelle Balm, Sally Roberts, Sarah Jefferies, Sharmini Muttaiyah, Susan Morpeth, Susan Taylor, Timothy Blackmore, Vani Sathyendran, Veronica Playle, Virginia Hope, Erasmus Smit, Lauren Jelly, Olin Silander, Joep de Lig |
| see above                                                                                                                                                                      | Canterbury Health Laboratories                                                                    | Institute of Environmental Science and Research (ESR)                                                                | Xiaoyun Ren, Matt Storey, Nikki Freed, Muhammad Faisal, Jing Wang, Hermes Perez, Anja Werno, Antje van der Linden, Arlo Upton, Chris Mansell, David Hammer, Dragana Drinkovic, Gary McAuliffe, Hana Sofia Andersson, James Ussher, Jill Sherwood, Josh Freeman, Julia Howard, Juliet Elvy, Mary DeAlmeida, Matt Blakiston, Matthew Rogers, Max Bloomfield, Michael Addidle, Michelle Balm, Sally Roberts, Sarah Jefferies, Sharmini Muttaiyah, Susan Morpeth, Susan Taylor, Timothy Blackmore, Vani Sathyendran, Veronica Playle, Virginia Hope, Erasmus Smit, Lauren Jelly, Olin Silander, Joep de Lig |
| EPI_ISL_626249                                                                                                                                                                 | Department of Clinical Microbiology                                                               | GIGA Medical Genomics                                                                                                |                                                                                                                                                                                                                                                                                                                                                                                                                                                                                                                                                                                                         |
| EPI_ISL_626595                                                                                                                                                                 | The National Institute of Public Health                                                           | State Veterinary Institute Prague                                                                                    |                                                                                                                                                                                                                                                                                                                                                                                                                                                                                                                                                                                                         |
| EPI_ISL_629010                                                                                                                                                                 | Sydney South West Pathology Service (SSWPS) - Royal Prince Alfred Hospital - NSW Health Pathology | NSW Health Pathology - Institute of Clinical Pathology and Medical Research; Westmead Hospital; University of Sydney | CIDM-PH et al.                                                                                                                                                                                                                                                                                                                                                                                                                                                                                                                                                                                          |
| EPI_ISL_629334, EPI_ISL_629440, EPI_ISL_629723                                                                                                                                 | Lighthouse Lab in Milton Keynes                                                                   | Wellcome Sanger Institute for the COVID-19 Genomics UK (COG-UK) consortium                                           | The Lighthouse Lab in Milton Keynes and Alex Alderton, Roberto Amato, Sonia Goncalves, Ewan Harrison, David K. Jackson, Ian Johnston, Dominic Kwiatkowski, Cordelia Langford, John Sillitoe on behalf of the Wellcome Sanger Institute COVID-19 Surveillance Team                                                                                                                                                                                                                                                                                                                                       |
| EPI_ISL_631501                                                                                                                                                                 | Wisconsin State Laboratory of Hygiene Communicable Disease Division                               | Wisconsin State Laboratory of Hygiene Communicable Disease Division                                                  | Kelsey R. Florek, Abigail C. Shockey                                                                                                                                                                                                                                                                                                                                                                                                                                                                                                                                                                    |
| EPI_ISL_632267                                                                                                                                                                 | Communicable Disease Laboratory, Public Health Directorate                                        | Communicable Disease Laboratory, Public Health Directorate                                                           | AlWasti,H., AlTaif,Z., AlHujairi,Z., AlAbbas,Z.                                                                                                                                                                                                                                                                                                                                                                                                                                                                                                                                                         |
| EPI_ISL_632312                                                                                                                                                                 | NU-sjukvården                                                                                     | Clinical microbiology, Sahlgrenska University Hospital                                                               | Johan Ringlander, Josefín Olausson, Hedvig Engström Jakobsson, Magnus Lindh                                                                                                                                                                                                                                                                                                                                                                                                                                                                                                                             |
| EPI_ISL_632417, EPI_ISL_632562                                                                                                                                                 | Dutch COVID-19 response team                                                                      | Erasmus Medical Center                                                                                               | Bas Oude Munnink, David Nieuwenhuijse, Reina Sikkema, Claudia Schapendonk, Irina Chestakova, Anne van der Linden, Theo Bestebroer, Stefan van Nieuwkoop, Mark Pronk, Pascal Lexmond, Corien Swaan, Manon Haverkate, Madelief Mollers, Mart Stein, Sandra Kengne Kanga Mobou, Jeroen van Kampen, Jolanda Voermans, Aura Timen, Corine GeurtsvanKessel, Annemieke van der Eijk, Richard Molenkamp, Marion Koopmans, on behalf of the Dutch national COVID-19 response team.                                                                                                                               |
| EPI_ISL_633108                                                                                                                                                                 | Lighthouse Lab in Cambridge                                                                       | Wellcome Sanger Institute for the COVID-19 Genomics UK (COG-UK) consortium                                           | Rob Howes, The Lighthouse Lab in Cambridge and Alex Alderton, Roberto Amato, Sonia Goncalves, Ewan Harrison, David K. Jackson, Ian Johnston, Dominic Kwiatkowski, Cordelia Langford, John Sillitoe on behalf of the Wellcome Sanger Institute COVID-19 Surveillance Team                                                                                                                                                                                                                                                                                                                                |
| EPI_ISL_635027                                                                                                                                                                 | National Health Laboratory Service - Inkosi Albert Luthuli Central Hospital (NHLS-IALCH)          | KRISP, KZN Research Innovation and Sequencing Platform                                                               | Gianhari J, Pillay S, Lessells R, Mdlalose K, York D, Khan S, Tegally H, Wilkinson E, de Oliveira T                                                                                                                                                                                                                                                                                                                                                                                                                                                                                                     |
| EPI_ISL_635126, EPI_ISL_635136                                                                                                                                                 | Department of Medical Microbiology, St. Olavs hospital                                            | Norwegian Institute of Public Health, Department of Virology                                                         | Kathrine Stene-Johansen, Kamilla Heddeland Instefjord, Hilde Elshaug, Marie Paulsen Madsen, Rasmus Riis Kopperud, Hilde Vollan, Karoline Bragstad, Olav Hungnes                                                                                                                                                                                                                                                                                                                                                                                                                                         |
| EPI_ISL_635168                                                                                                                                                                 | Vestfold Hospital, Toensberg Department of Microbiology                                           | Norwegian Institute of Public Health, Department of Virology                                                         | Kathrine Stene-Johansen, Kamilla Heddeland Instefjord, Hilde Elshaug, Marie Paulsen Madsen, Rasmus Riis Kopperud, Hilde Vollan, Karoline Bragstad, Olav Hungnes                                                                                                                                                                                                                                                                                                                                                                                                                                         |
| EPI_ISL_635272                                                                                                                                                                 | Institute of Microbiology and Immunology, Faculty of Medicine, University of Ljubljana            | Institute of Microbiology and Immunology, Faculty of Medicine, University of Ljubljana                               | Tomaž Mark Zorec, Samo Zakotnik, Miša Korva, Tatjana Avši - Županc, Mario Poljak                                                                                                                                                                                                                                                                                                                                                                                                                                                                                                                        |
| EPI_ISL_636560                                                                                                                                                                 | Dutch COVID-19 response team                                                                      | National Institute for Public Health and the Environment (RIVM)                                                      | Adam Meijer, Harry Vennema, Jeroen Cremer, Sharon van den Brink, Bas van der Veer, AnneMarie van den Brandt, Florian Zwagemaker, Dennis Schmitz, Chantal Reusken, on behalf of the national COVID-19 response team                                                                                                                                                                                                                                                                                                                                                                                      |
| EPI_ISL_636977                                                                                                                                                                 | HP Pemba                                                                                          | KRISP, KZN Research Innovation and Sequencing Platform                                                               | Ismael N, Gianhari J, Pillay S, Tegally H, Wilkinson E, de Oliveira T, Nadia Siteo, Paulo Arnaldo, Nedio Mabunda                                                                                                                                                                                                                                                                                                                                                                                                                                                                                        |
| EPI_ISL_637084                                                                                                                                                                 | LabTests                                                                                          | Institute of Environmental Science and Research (ESR)                                                                | Xiaoyun Ren, Matt Storey, Nikki Freed, Muhammad Faisal, Jing Wang, Hermes Perez, Anja Werno, Antje van der Linden, Arlo Upton, Chris Mansell, David Hammer, Dragana Drinkovic, Gary McAuliffe, Hana Sofia Andersson, James Ussher, Jill Sherwood, Josh Freeman, Julia Howard, Juliet Elvy, Mary DeAlmeida, Matt Blakiston, Matthew Rogers, Max Bloomfield, Michael Addidle, Michelle Balm, Sally Roberts, Sarah Jefferies, Sharmini Muttaiyah, Susan Morpeth, Susan Taylor, Timothy Blackmore, Vani Sathyendran, Veronica Playle, Virginia Hope, Erasmus Smit, Lauren Jelly, Olin Silander, Joep de Lig |
| EPI_ISL_637085                                                                                                                                                                 | Wellington SCL (WN)                                                                               | Institute of Environmental Science and Research (ESR)                                                                | Xiaoyun Ren, Matt Storey, Nikki Freed, Muhammad Faisal, Jing Wang, Hermes Perez, Anja Werno, Antje van der Linden, Arlo Upton, Chris Mansell, David Hammer, Dragana Drinkovic, Gary McAuliffe, Hana Sofia Andersson, James Ussher, Jill Sherwood, Josh Freeman, Julia Howard, Juliet Elvy, Mary DeAlmeida, Matt Blakiston, Matthew Rogers, Max Bloomfield, Michael Addidle, Michelle Balm, Sally Roberts, Sarah Jefferies, Sharmini Muttaiyah, Susan Morpeth, Susan Taylor, Timothy Blackmore, Vani Sathyendran, Veronica Playle, Virginia Hope, Erasmus Smit, Lauren Jelly, Olin Silander, Joep de Lig |
| EPI_ISL_637096                                                                                                                                                                 | LabTests                                                                                          | Institute of Environmental Science and Research (ESR)                                                                | Xiaoyun Ren, Matt Storey, Nikki Freed, Muhammad Faisal, Jing Wang, Hermes Perez, Anja Werno, Antje van der Linden, Arlo Upton, Chris Mansell, David Hammer, Dragana Drinkovic, Gary McAuliffe, Hana Sofia Andersson, James Ussher, Jill Sherwood, Josh Freeman, Julia Howard, Juliet Elvy, Mary DeAlmeida, Matt Blakiston, Matthew Rogers, Max Bloomfield, Michael Addidle, Michelle Balm, Sally Roberts, Sarah Jefferies, Sharmini Muttaiyah, Susan Morpeth, Susan Taylor, Timothy Blackmore, Vani Sathyendran, Veronica Playle, Virginia Hope, Erasmus Smit, Lauren Jelly, Olin Silander, Joep de Lig |
| EPI_ISL_639825                                                                                                                                                                 | National Virus Reference Laboratory                                                               | National Virus Reference Laboratory                                                                                  | Michael Carr, Gabriel Gonzalez, Jonathan Dean, Daniel Hare, Cillian F De Gascun                                                                                                                                                                                                                                                                                                                                                                                                                                                                                                                         |
| EPI_ISL_643006, EPI_ISL_643020                                                                                                                                                 | Lighthouse Lab in Milton Keynes                                                                   | Wellcome Sanger Institute for the COVID-19 Genomics UK (COG-UK) Consortium                                           | The Lighthouse Lab in Milton Keynes and Alex Alderton, Roberto Amato, Sonia Goncalves, Ewan Harrison, David K. Jackson, Ian Johnston, Dominic Kwiatkowski, Cordelia Langford, John Sillitoe on behalf of the Wellcome Sanger Institute COVID-19 Surveillance Team                                                                                                                                                                                                                                                                                                                                       |
| EPI_ISL_643939                                                                                                                                                                 | Lighthouse Lab in Cambridge                                                                       | Wellcome Sanger Institute for the COVID-19 Genomics UK (COG-UK) Consortium                                           | Rob Howes, The Lighthouse Lab in Cambridge and Alex Alderton, Roberto Amato, Sonia Goncalves, Ewan Harrison, David K. Jackson, Ian Johnston, Dominic Kwiatkowski, Cordelia Langford, John Sillitoe on behalf of the Wellcome Sanger Institute COVID-19 Surveillance Team                                                                                                                                                                                                                                                                                                                                |
| EPI_ISL_644723                                                                                                                                                                 | Osmania Medical College                                                                           | CSIR-Centre for Cellular and Molecular Biology                                                                       | Dr.V.Sudha Rani,Dr.S.Pavani,Dr.Satyaprasad,Dr.P.Shashikala Reddy,Lamuk Zaveri,Shagufra Khan,Nikhil Hajirnis,M Soujanya Reddy,Pratheusa                                                                                                                                                                                                                                                                                                                                                                                                                                                                  |

|                                                                |                                                                                                                                                                                                 |                                                                                                                                   |                                                                                                                                                                                                                                                                                                                                                                                                                                                                                                                                                                                                         |
|----------------------------------------------------------------|-------------------------------------------------------------------------------------------------------------------------------------------------------------------------------------------------|-----------------------------------------------------------------------------------------------------------------------------------|---------------------------------------------------------------------------------------------------------------------------------------------------------------------------------------------------------------------------------------------------------------------------------------------------------------------------------------------------------------------------------------------------------------------------------------------------------------------------------------------------------------------------------------------------------------------------------------------------------|
|                                                                |                                                                                                                                                                                                 |                                                                                                                                   | Maccha,Namami Gaur,Sakshi Shambhavi,Tulasi Nagabandi,Purushotham Vodnala,Blessy B John,Viswagithe S L,B Himasri,Payel Mukherjee,Sofia Banu,Priya Singh,Archana Bharadwaj Siva,Karthik Bharadwaj Tallapaka,Rakesh K Mishra,Divya Tej Sowpati                                                                                                                                                                                                                                                                                                                                                             |
| EPI_ISL_648128                                                 | UHAS COVID-19 Lab                                                                                                                                                                               | UHAS COVID-19 Lab                                                                                                                 | Kwabena O. Duedu, Jones Gyamfi, Reuben Ayivor-Djanie, John O. Gyapong and the UHAS COVID-19 Lab Team                                                                                                                                                                                                                                                                                                                                                                                                                                                                                                    |
| EPI_ISL_648130                                                 | Uppsala klinisk mikrobiologi                                                                                                                                                                    | The Public Health Agency of Sweden                                                                                                | Anna-Malin Linde, Maria Lind Karlberg, Mattias Haukland, Reza Advani, Olov Svartstrom, Oskar Karlsson Lindsjo, Sandra Broddesson, Petra Edquist, Mia Brytting, Anna Risberg, Karin Tegmark-Wisell                                                                                                                                                                                                                                                                                                                                                                                                       |
| EPI_ISL_648698                                                 | Department of Laboratory Medicine, Tan Tock Seng Hospital                                                                                                                                       | Department of Laboratory Medicine, Tan Tock Seng Hospital                                                                         | Chen YYC, Zair X, Lim JX, Li C, Tang WY, Maurer-Stroh S, Barkham TMS, Nagarajan N, Sessions OM                                                                                                                                                                                                                                                                                                                                                                                                                                                                                                          |
| EPI_ISL_649123, EPI_ISL_649125                                 | Wellington SCL (WN)                                                                                                                                                                             | Institute of Environmental Science and Research (ESR)                                                                             | Xiaoyun Ren, Matt Storey, Nikki Freed, Muhammad Faisal, Jing Wang, Hermes Perez, Anja Werno, Antje van der Linden, Arlo Upton, Chris Mansell, David Hammer, Dragana Drinkovic, Gary McAuliffe, Hana Sofia Andersson, James Ussher, Jill Sherwood, Josh Freeman, Julia Howard, Juliet Elvy, Mary DeAlmeida, Matt Blakiston, Matthew Rogers, Max Bloomfield, Michael Addidle, Michelle Balm, Sally Roberts, Sarah Jefferies, Sharmini Muttaiyah, Susan Morpeth, Susan Taylor, Timothy Blackmore, Vani Sathyendran, Veronica Playle, Virginia Hope, Erasmus Smit, Lauren Jelly, Olin Silander, Joep de Lig |
| EPI_ISL_650833                                                 | Virology Department, Royal Infirmary of Edinburgh, NHS Lothian / School of Biological Sciences, University of Edinburgh / Institute of Genetics and Molecular Medicine, University of Edinburgh | COVID-19 Genomics UK (COG-UK) Consortium                                                                                          | McHugh M, Dewar R, Rooke S, Gallagher M, Balcaza C, O'Toole A, Scher E, Hill V, McCrone JT, Colquhoun R, Yu X, Jackson B, Rambaut A, Williams TC, Templeton K                                                                                                                                                                                                                                                                                                                                                                                                                                           |
| EPI_ISL_653757                                                 | Instituto Nacional de Salud, Bogotá, Colombia                                                                                                                                                   | Instituto Nacional de Salud, Bogotá, Colombia                                                                                     | Katherine Laiton-Donato, Diego A. Álvarez-Díaz, Carlos Franco-Muñoz, Mauricio Pacheco-Montealegre, Jonathan Reales, Diego Andrés Prada, Jose A. Usme-Ciro, Zulma M. Cucunubá, Christian Julian Villabona-Arenas, Liz Villabona-Arenas, Sussy Echeverria, Astrid C. Flórez, Carolina Ferro, Diana Marcela Walteros-Acero, Franklin Prieto, Carlos Andrés Durán, Martha Lucia Ospina Martínez, Marcela Mercado-Reyes                                                                                                                                                                                      |
| EPI_ISL_654275                                                 | Hospital General Universitario Gregorio Marañón                                                                                                                                                 | SeqCOVID-SPAIN consortium/IBV(CSIC)                                                                                               | Darío García de Viedma, Laura Pérez-Lago, Marta Herranz, Jon Sicilia, Julia Suárez, Pilar Catalán, Patricia Muñoz and SeqCOVID-SPAIN consortium                                                                                                                                                                                                                                                                                                                                                                                                                                                         |
| EPI_ISL_658217                                                 | Lighthouse Lab in Milton Keynes                                                                                                                                                                 | Wellcome Sanger Institute for the COVID-19 Genomics UK (COG-UK) Consortium                                                        | The Lighthouse Lab in Milton Keynes and Alex Alderton, Roberto Amato, Sonia Goncalves, Ewan Harrison, David K. Jackson, Ian Johnston, Dominic Kwiatkowski, Cordelia Langford, John Sillitoe on behalf of the Wellcome Sanger Institute COVID-19 Surveillance Team                                                                                                                                                                                                                                                                                                                                       |
| EPI_ISL_660155                                                 | PathCare                                                                                                                                                                                        | National Health Laboratory Service (NHLS), Tygerberg                                                                              | Susan Engelbrecht, Draper C, Davis M-A, Siegfried N, Williamson C, Hsiao M, Kayla Delaney, Bronwyn Kleinhans, Houriyah Tegally, Eduan Wilkindon, Gert van Zyl, Wolfgang Preiser, Tulio de Oliveira                                                                                                                                                                                                                                                                                                                                                                                                      |
| EPI_ISL_660379                                                 | Orebro klinisk mikrobiologi                                                                                                                                                                     | The Public Health Agency of Sweden                                                                                                | Anna-Malin Linde, Maria Lind Karlberg, Mattias Haukland, Reza Advani, Olov Svartstrom, Oskar Karlsson Lindsjo, Sandra Broddesson, Petra Edquist, Mia Brytting, Anna Risberg, Karin Tegmark-Wisell                                                                                                                                                                                                                                                                                                                                                                                                       |
| EPI_ISL_660458                                                 | Laboratoire de Microbiologie CHU Sourou Sanou                                                                                                                                                   | Centre Muraz                                                                                                                      | Abdoul-Salam Ouedraogo, Yacouba Sawadogo, Essia Belarbi, Grit Schubert, Fabian Leendertz, Arsène Zongo, Soumeya Ouangraoua, Zekiba Tarnagda, Lassana Sangaré, Halidou Tinto                                                                                                                                                                                                                                                                                                                                                                                                                             |
| EPI_ISL_660597                                                 | The National Institute of Public Health                                                                                                                                                         | State Veterinary Institute Prague                                                                                                 | Nagy,A.;Jirincova,H;Novakova,L;Trnka,D;Vecerova,J                                                                                                                                                                                                                                                                                                                                                                                                                                                                                                                                                       |
| EPI_ISL_661843                                                 | Lighthouse Lab in Glasgow                                                                                                                                                                       | Wellcome Sanger Institute for the COVID-19 Genomics UK (COG-UK) Consortium                                                        | Harper VanSteenhouse, Yumi Kasai, David Gray, Carol Clugston, Anna Dominiczak and Alex Alderton, Roberto Amato, Sonia Goncalves, Ewan Harrison, David K. Jackson, Ian Johnston, Dominic Kwiatkowski, Cordelia Langford, John Sillitoe on behalf of the Wellcome Sanger Institute COVID-19 Surveillance Team                                                                                                                                                                                                                                                                                             |
| EPI_ISL_667588, EPI_ISL_667604, EPI_ISL_667628                 | Pathogen Genomics Center, National Institute of Infectious Diseases                                                                                                                             | Pathogen Genomics Center, National Institute of Infectious Diseases                                                               | Tsuyoshi Sekizuka, Kentaro Itokawa, Rina Tanaka, Masanori Hashino, Makoto Kuroda                                                                                                                                                                                                                                                                                                                                                                                                                                                                                                                        |
| EPI_ISL_668401                                                 | Oslo University Hospital, Department of Medical Microbiology                                                                                                                                    | Norwegian Institute of Public Health, Department of Virology                                                                      | Kathrine Stene-Johansen, Kamilla Heddeland Instefjord, Hilde Elshaug, Marie Paulsen Madsen, Rasmus Riis Kopperud, Hilde Vollan, Karoline Bragstad, Olav Hungnes                                                                                                                                                                                                                                                                                                                                                                                                                                         |
| EPI_ISL_669747                                                 | Department of Virus and Microbiological Special Diagnostics, Statens Serum Institut, Copenhagen, Denmark                                                                                        | Albertsen Lab, Department of Chemistry and Bioscience, Aalborg University, Denmark                                                | Danish Covid-19 Genome Consortium                                                                                                                                                                                                                                                                                                                                                                                                                                                                                                                                                                       |
| EPI_ISL_671422                                                 | University of Debrecen, Department of Medical Microbiology                                                                                                                                      | National Laboratory of Virology, Szentágotthai Research Centre                                                                    | Endre Gábor Tóth, Balázs Somogyi, Brigitta Zana, Eszter Csoma, Ferenc Jakab, Gábor Kemenesi                                                                                                                                                                                                                                                                                                                                                                                                                                                                                                             |
| EPI_ISL_671659                                                 | Unity Health Toronto                                                                                                                                                                            | Ontario Institute for Cancer Research                                                                                             | Ramzi Fattouh, Larissa M. Matukas, Yan Chen,Mark Downing, Trina Otterman, Karel Boissinot, Wai Sum Siu, Zhi Cui, Le Luu, Samira Mubareka, TIBDN, Ilinc Lungu, Bernard Lam, Jeremy Johns, Paul Krzyzanowski, Richard de Borja, Felicia Vincelli, Phillip Zuzarte, Jared T. Simpson                                                                                                                                                                                                                                                                                                                       |
| EPI_ISL_671818                                                 | Hospital de la Santa Creu i Sant Pau. Servicio de Microbiología                                                                                                                                 | SeqCOVID-SPAIN consortium/IBV(CSIC)                                                                                               | Ferran Navarro, Núria Rabella, Elisenda Miró and SeqCOVID-SPAIN consortium                                                                                                                                                                                                                                                                                                                                                                                                                                                                                                                              |
| EPI_ISL_671878                                                 | National Virus Reference Laboratory                                                                                                                                                             | National Virus Reference Laboratory                                                                                               | Michael Carr, Gabriel Gonzalez, Jonathan Dean, Daniel Hare, Cillian F De Gascun                                                                                                                                                                                                                                                                                                                                                                                                                                                                                                                         |
| EPI_ISL_674552, EPI_ISL_675606                                 | Lighthouse Lab in Milton Keynes                                                                                                                                                                 | Wellcome Sanger Institute for the COVID-19 Genomics UK (COG-UK) Consortium                                                        | The Lighthouse Lab in Milton Keynes and Alex Alderton, Roberto Amato, Sonia Goncalves, Ewan Harrison, David K. Jackson, Ian Johnston, Dominic Kwiatkowski, Cordelia Langford, John Sillitoe on behalf of the Wellcome Sanger Institute COVID-19 Surveillance Team                                                                                                                                                                                                                                                                                                                                       |
| EPI_ISL_676506                                                 | Klinisk mikrobiologi                                                                                                                                                                            | The Public Health Agency of Sweden                                                                                                | Department of Microbiology, The Public Health Agency of Sweden                                                                                                                                                                                                                                                                                                                                                                                                                                                                                                                                          |
| EPI_ISL_678246                                                 | Pathogen Genomics Lab King Abdullah University of Science and Technology(KAUST)                                                                                                                 | Pathogen Genomics Lab King Abdullah University of Science and Technology(KAUST)                                                   | Luke Esau, Amanda Ooi, Sharif Hala, Raece Naeem, Sara Mfarrej, Asim Khogeer, Fadwa Alofi, Afrah Alsomali, Jumana Taha, Abdulaziz Alahmadi, Kahled Alghithami, Anwar Hashem, Naif Ailmontashiri, Arnab Pain                                                                                                                                                                                                                                                                                                                                                                                              |
| EPI_ISL_678256                                                 | General Hospital - Ohrid                                                                                                                                                                        | Research Center for Genetic Engineering and Biotechnology "Georgi D. Efremov" , Macedonian Academy of Sciences and Arts           | RCGEB - MASA                                                                                                                                                                                                                                                                                                                                                                                                                                                                                                                                                                                            |
| EPI_ISL_678260                                                 | General Hospital - Struga                                                                                                                                                                       | Research Center for Genetic Engineering and Biotechnology "Georgi D. Efremov" , Macedonian Academy of Sciences and Arts           | RCGEB - MASA                                                                                                                                                                                                                                                                                                                                                                                                                                                                                                                                                                                            |
| EPI_ISL_678370                                                 | Area of Virology, Serology and Virology Division (SAVID), New South Wales Health Pathology Randwick                                                                                             | Virology Research Laboratory; Area of Virology, Serology and Virology Division (SAVID), New South Wales Health Pathology Randwick | Foster, C.; Au, J.; Ruiz Silva, M.; Deveson, I.; Bull, R.; Van Hal, S.; Rawlinson, W.                                                                                                                                                                                                                                                                                                                                                                                                                                                                                                                   |
| EPI_ISL_678781                                                 | Respiratory Virus Unit, Microbiology Services Colindale, Public Health England                                                                                                                  | COVID-19 Genomics UK (COG-UK) Consortium                                                                                          | PHE Covid Sequencing Team                                                                                                                                                                                                                                                                                                                                                                                                                                                                                                                                                                               |
| EPI_ISL_681629                                                 | Lighthouse Lab in Milton Keynes                                                                                                                                                                 | Wellcome Sanger Institute for the COVID-19 Genomics UK (COG-UK) Consortium                                                        | The Lighthouse Lab in Milton Keynes and Alex Alderton, Roberto Amato, Sonia Goncalves, Ewan Harrison, David K. Jackson, Ian Johnston, Dominic Kwiatkowski, Cordelia Langford, John Sillitoe on behalf of the Wellcome Sanger Institute COVID-19 Surveillance Team                                                                                                                                                                                                                                                                                                                                       |
| EPI_ISL_681841                                                 | Molecular diagnostic unit for viral haemorrhagic fevers and emerging viruses, Bouaké CHU Laboratory                                                                                             | Project group Epidemiology of Highly Pathogenic Microorganisms, Robert Koch-Institute                                             | Chantal Akoua-Koffi, Diané Bamourou, Etilé Anoh, Essia Belarbi, Safiatou Karidioula, Grit Schubert, Adjaratou Traoré, Soundélé Maité, Monemo Pacome, Coulibaly Mbegan, Bamba Fatoumata Touré, Kra Ouffoué, Fabian Leendertz                                                                                                                                                                                                                                                                                                                                                                             |
| EPI_ISL_682012, EPI_ISL_682014, EPI_ISL_682017, EPI_ISL_682021 | UPMC Clinical Microbiology Laboratory                                                                                                                                                           | Microbial Genomic Epidemiology Laboratory, University of Pittsburgh                                                               | Mustapha M. Mustapha, Jane W. Marsh, Dan Snyder, Marissa P. Griffith, Stephanie L. Mitchell, Vatsala R. Srinivasa, Kady D. Waggle, Chinele Ezeonwuku, Vaughn S. Cooper, Lee H. Harrison                                                                                                                                                                                                                                                                                                                                                                                                                 |
| EPI_ISL_683471                                                 | Respiratory Virus Unit, Microbiology Services Colindale, Public Health England                                                                                                                  | COVID-19 Genomics UK (COG-UK) Consortium                                                                                          | PHE Covid Sequencing Team                                                                                                                                                                                                                                                                                                                                                                                                                                                                                                                                                                               |
| EPI_ISL_683835                                                 | CICM                                                                                                                                                                                            | Malaria Research and Training Center (MRTC-Parasito)                                                                              | Antoine Dara, Abdoulaye Djimde                                                                                                                                                                                                                                                                                                                                                                                                                                                                                                                                                                          |
| EPI_ISL_687161                                                 | Pathogen Genomics Center, National Institute of Infectious Diseases                                                                                                                             | Pathogen Genomics Center, National Institute of Infectious Diseases                                                               | Tsuyoshi Sekizuka, Kentaro Itokawa, Rina Tanaka, Masanori Hashino, Makoto Kuroda                                                                                                                                                                                                                                                                                                                                                                                                                                                                                                                        |
| EPI_ISL_696505                                                 | Khayeletu Clinic wc KLC & NHLS/UCT                                                                                                                                                              | KRISP, KZN Research Innovation and Sequencing Platform                                                                            | Arash Iranzadeh, Deelan Doolabh, Lynn Tyers, Bruna Galvao, Innocent Mudau, Marvin Hsiao, Kruger Marais, Jennifer Giandhari, Sureshnee Pillay, Houriyah                                                                                                                                                                                                                                                                                                                                                                                                                                                  |

|                                                                |                                                                                                                   |                                                                                                                                   |                                                                                                                                                                                                                                                                                                                                                                                                                                                            |
|----------------------------------------------------------------|-------------------------------------------------------------------------------------------------------------------|-----------------------------------------------------------------------------------------------------------------------------------|------------------------------------------------------------------------------------------------------------------------------------------------------------------------------------------------------------------------------------------------------------------------------------------------------------------------------------------------------------------------------------------------------------------------------------------------------------|
| EPI_ISL_698169, EPI_ISL_698231, EPI_ISL_698282, EPI_ISL_698491 | Group 42 (G42) Healthcare, Abu Dhabi, United Arab Emirates; Department of Health, The United Arab Emirates        | G42 Healthcare                                                                                                                    | Tegally, Emanuel James San, Tulio de Oliveira, Diana Hardie, Stephen Korsman, Carolyn Williamson                                                                                                                                                                                                                                                                                                                                                           |
| EPI_ISL_700195, EPI_ISL_700261, EPI_ISL_700277                 | Hematopathology Laboratory, ACTREC, TMC                                                                           | Hematopathology Laboratory, ACTREC, TMC                                                                                           | Hematopathology Laboratory, ACTREC                                                                                                                                                                                                                                                                                                                                                                                                                         |
| EPI_ISL_700594                                                 | Oudshoorn Hospital wc OUD                                                                                         | NHLS/UCT                                                                                                                          | Arash Iranzadeh, Deelan Doolabh, Lynn Tyers, Bruna Galvao, Innocent Mudau, Marvin Hsiao, Kruger Marais, Diana Hardie, Stephen Korsman, Carolyn Williamson                                                                                                                                                                                                                                                                                                  |
| EPI_ISL_702042                                                 | Lighthouse Lab in Cambridge                                                                                       | Wellcome Sanger Institute for the COVID-19 Genomics UK (COG-UK) Consortium                                                        | Rob Howes, The Lighthouse Lab in Cambridge and Alex Alderton, Roberto Amato, Sonia Goncalves, Ewan Harrison, David K. Jackson, Ian Johnston, Dominic Kwiatkowski, Cordelia Langford, John Sillitoe on behalf of the Wellcome Sanger Institute COVID-19 Surveillance Team                                                                                                                                                                                   |
| EPI_ISL_703358                                                 | Lighthouse Lab in Glasgow                                                                                         | Wellcome Sanger Institute for the COVID-19 Genomics UK (COG-UK) Consortium                                                        | Harper VanSteenhouse, Yumi Kasai, David Gray, Carol Clugston, Anna Dominiczak and Alex Alderton, Roberto Amato, Sonia Goncalves, Ewan Harrison, David K. Jackson, Ian Johnston, Dominic Kwiatkowski, Cordelia Langford, John Sillitoe on behalf of the Wellcome Sanger Institute COVID-19 Surveillance Team                                                                                                                                                |
| EPI_ISL_704699                                                 | Lighthouse Lab in Cambridge                                                                                       | Wellcome Sanger Institute for the COVID-19 Genomics UK (COG-UK) Consortium                                                        | Rob Howes, The Lighthouse Lab in Cambridge and Alex Alderton, Roberto Amato, Sonia Goncalves, Ewan Harrison, David K. Jackson, Ian Johnston, Dominic Kwiatkowski, Cordelia Langford, John Sillitoe on behalf of the Wellcome Sanger Institute COVID-19 Surveillance Team                                                                                                                                                                                   |
| EPI_ISL_704799                                                 | Quadram Institute Bioscience                                                                                      | COVID-19 Genomics UK (COG-UK) Consortium                                                                                          | Dave J. Baker, Gemma L. Kay, Alp Aydin, Thanh Le-Viet, Steven Rudder, Ana P. Tedim, Anastasia Kolyva, Maria Diaz, Leonardo de Oliveira Martins, Nabil-Fareed Alikhan, Lizzie Meadows, Rachael Stanley, Ngozi Elumogo, Muhammed Yasir, Nicholas M. Thomson, Alexander J. Trotter, Rachel Gilroy, Samuel Bloomfield, Claire Stuart, Andrew Bell, Reenesh Prakash, Samir Dervisevic, Alison E. Mather, John Wain, Mark Webber, Andrew J. Page, Justin O'Grady |
| EPI_ISL_705082                                                 | Lighthouse Lab in Cambridge                                                                                       | Wellcome Sanger Institute for the COVID-19 Genomics UK (COG-UK) Consortium                                                        | Rob Howes, The Lighthouse Lab in Cambridge and Alex Alderton, Roberto Amato, Sonia Goncalves, Ewan Harrison, David K. Jackson, Ian Johnston, Dominic Kwiatkowski, Cordelia Langford, John Sillitoe on behalf of the Wellcome Sanger Institute COVID-19 Surveillance Team                                                                                                                                                                                   |
| EPI_ISL_707896                                                 | Area of Virology, Serology and Virology Division (SAViD), New South Wales Health Pathology Randwick               | Virology Research Laboratory; Area of Virology, Serology and Virology Division (SAViD), New South Wales Health Pathology Randwick | Foster, C.; Au, J.; Ruiz Silva, M.; Deveson, I.; Bull, R.; Van Hal, S.; Rawlinson, W.                                                                                                                                                                                                                                                                                                                                                                      |
| EPI_ISL_708188                                                 | Pamukkale University Hospital                                                                                     | Pamukkale University Department of Medical Genetics                                                                               | Onur TOKGUN et al.                                                                                                                                                                                                                                                                                                                                                                                                                                         |
| EPI_ISL_708783                                                 | PathWest Laboratory Medicine WA                                                                                   | PathWest Laboratory Medicine WA Microbial Surveillance Unit                                                                       | PathWest Laboratory Medicine WA Microbial Surveillance Unit                                                                                                                                                                                                                                                                                                                                                                                                |
| EPI_ISL_709653                                                 | Lighthouse Lab in Milton Keynes                                                                                   | Wellcome Sanger Institute for the COVID-19 Genomics UK (COG-UK) Consortium                                                        | The Lighthouse Lab in Milton Keynes and Alex Alderton, Roberto Amato, Sonia Goncalves, Ewan Harrison, David K. Jackson, Ian Johnston, Dominic Kwiatkowski, Cordelia Langford, John Sillitoe on behalf of the Wellcome Sanger Institute COVID-19 Surveillance Team                                                                                                                                                                                          |
| EPI_ISL_711232, EPI_ISL_713269                                 | Department of Virus and Microbiological Special Diagnostics, Statens Serum Institut, Copenhagen, Denmark          | Albertsen Lab, Department of Chemistry and Bioscience, Aalborg University, Denmark                                                | Danish Covid-19 Genome Consortium                                                                                                                                                                                                                                                                                                                                                                                                                          |
| EPI_ISL_718166                                                 | Ministry of Health Hospitals                                                                                      | Institute of Health and Community Medicine                                                                                        | David Perera, Ooi Mong How, Chua Hock Hin, Tonnie Sia Loong Loong, Wong Jyn Shan, Wong King Aik, Chan Chia Jui                                                                                                                                                                                                                                                                                                                                             |
| EPI_ISL_718682, EPI_ISL_718881                                 | Lighthouse Lab in Alderley Park                                                                                   | Wellcome Sanger Institute for the COVID-19 Genomics UK (COG-UK) Consortium                                                        | Jacquelyn Wynn, Mairead Hyland, The Lighthouse Lab in Alderley Park and Alex Alderton, Roberto Amato, Sonia Goncalves, Ewan Harrison, David K. Jackson, Ian Johnston, Dominic Kwiatkowski, Cordelia Langford, John Sillitoe on behalf of the Wellcome Sanger Institute COVID-19 Surveillance Team                                                                                                                                                          |
| EPI_ISL_722444, EPI_ISL_722463                                 | Dutch COVID-19 response team                                                                                      | Erasmus Medical Center                                                                                                            | Bas Oude Munnink, Reina Sikkema, David Nieuwenhuijse, Irina Chestakova, Anne van der Linden, Marjan Boter, Emmanuelle Munger, Corine GeurtsvanKessel, Annemiek van der Eijk, Richard Molenkamp, Marion Koopmans, on behalf of the Dutch national COVID-19 response team.                                                                                                                                                                                   |
| EPI_ISL_722980                                                 | Respiratory Virus Unit, National Infection Service, Public Health England                                         | COVID-19 Genomics UK (COG-UK) Consortium                                                                                          | PHE Covid Sequencing Team                                                                                                                                                                                                                                                                                                                                                                                                                                  |
| EPI_ISL_724819                                                 | Oxford Viromics, NDM, University of Oxford; Oxford University Hospitals; Basingstoke and North Hampshire Hospital | COVID-19 Genomics UK (COG-UK) Consortium                                                                                          | Tanya Golubchik, David Bonsall, George Macintyre, Amy Trebes, Mariateresa de Cesare, Catrin Moore, Alex Mobbs, Anita Justice, Robert Shaw, Monique Andersson, Timothy Peto, Emma Wise, Nathan Moore, Jessica Lynch, Nick Cortes, Matilde Mori, Stephen Kidd, David Buck, John Todd, Christophe Fraser                                                                                                                                                      |
| EPI_ISL_728566                                                 | Dutch COVID-19 response team                                                                                      | National Institute for Public Health and the Environment (RIVM)                                                                   | Adam Meijer, Harry Vennema, Jeroen Cremer, Sharon van den Brink, Bas van der Veer, AnneMarie van den Brandt, Florian Zwagemaker, Dennis Schmitz, Chantal Reusken, on behalf of the national COVID-19 response team                                                                                                                                                                                                                                         |
| EPI_ISL_729361                                                 | A. Krumbholz, Labor Dr. Krause und Kollegen MVZ GmbH, Kiel                                                        | Charité Universitätsmedizin Berlin, Institut für Virologie                                                                        | Victor M Corman, Barbara Mühlemann, Jörn Beheim-Schwarzbach, Talitha Veith, Julia Schneider, Terry Jones, Christian Drosten                                                                                                                                                                                                                                                                                                                                |
| EPI_ISL_729983, EPI_ISL_729984                                 | Nigeria Centre for Disease Control (NCDC)                                                                         | African Centre of Excellence for Genomics of Infectious Diseases (ACEGID), Redeemer's University, Ede, Osun State, Nigeria        | Oluniyi P.E. et al                                                                                                                                                                                                                                                                                                                                                                                                                                         |
| EPI_ISL_730333                                                 | San Diego County Public Health Laboratory                                                                         | Andersen lab at Scripps Research                                                                                                  | SEARCH Alliance San Diego with Tracy Basler, Jovan Shephard, Brett Austin                                                                                                                                                                                                                                                                                                                                                                                  |
| EPI_ISL_730521                                                 | Biolab Diagnostic Laboratories                                                                                    | Andersen lab at Scripps Research                                                                                                  | Issa Abu-Dayyeh, Ahmad Tibi, Lama Hussein, Lina Mohammad, Zein Naber, Amid Abdelnour with SEARCH Alliance San Diego                                                                                                                                                                                                                                                                                                                                        |
| EPI_ISL_730575                                                 | Gazi University Faculty of Medicine, Medical Virology Laboratory                                                  | Gazi University Faculty of Medicine, Medical Virology Laboratory                                                                  | Erdem ahin, Gülendem Bozday, Hager Muffah, Selin Yit, Shaknoza Sarzhanova, Özlem Güzel Tunçcan, Murat Dizbay, Il Fidan, Kayhan Çalar                                                                                                                                                                                                                                                                                                                       |
| EPI_ISL_732464                                                 | National Virus Reference Laboratory                                                                               | National Virus Reference Laboratory                                                                                               | Michael Carr, Gabriel Gonzalez, Jonathan Dean, Daniel Hare, Cillian F De Gascun                                                                                                                                                                                                                                                                                                                                                                            |
| EPI_ISL_733038, EPI_ISL_733104, EPI_ISL_733125                 | HELIX LLC                                                                                                         | WHO National Influenza Centre Russian Federation                                                                                  | Andrey Komissarov, Artem Fadeev, Anna Ivanova, Kseniya Komissarova, Dmitry Bazhenov, Daria Danilenko, Ksenia Safina, Elena Nabieva, Georgii Bazykin, Dmitry Lioznov                                                                                                                                                                                                                                                                                        |
| EPI_ISL_733190, EPI_ISL_733216                                 | Pathogenic Microorganisms Variability Laboratory                                                                  | WHO National Influenza Centre Russian Federation                                                                                  | Andrey Komissarov, Artem Fadeev, Anna Ivanova, Kseniya Komissarova, Dmitry Bazhenov, Daria Danilenko, Ksenia Safina, Elena Nabieva, Georgii Bazykin, Nadezhda Kuznetsova, Elena Shidlovskaya, Sergey Alkhovsky, Tatyana Vishnevskaya, Elizaveta Divisenko, Alexey Shchetinin, Maria Nikiforova, Andrey Pochtovyy, Evgeny Usachev, Elena Vokalova, Maxim Rubalsky, Oleg Rubalsky, Artem Tkachuk, Vladimir Gushchin, Alexander Gintsburg, Dmitry Lioznov     |
| EPI_ISL_733244, EPI_ISL_733246, EPI_ISL_733250, EPI_ISL_733403 | WHO National Influenza Centre Russian Federation                                                                  | WHO National Influenza Centre Russian Federation                                                                                  | Andrey Komissarov, Artem Fadeev, Anna Ivanova, Kseniya Komissarova, Dmitry Bazhenov, Daria Danilenko, Ksenia Safina, Elena Nabieva, Georgii Bazykin, Dmitry Lioznov                                                                                                                                                                                                                                                                                        |
| EPI_ISL_733453                                                 | HELIX LLC                                                                                                         | WHO National Influenza Centre Russian Federation                                                                                  | Andrey Komissarov, Artem Fadeev, Anna Ivanova, Kseniya Komissarova, Dmitry Bazhenov, Daria Danilenko, Ksenia Safina, Elena Nabieva, Georgii Bazykin, Dmitry Lioznov                                                                                                                                                                                                                                                                                        |
| EPI_ISL_734610, EPI_ISL_734933, EPI_ISL_734962, EPI_ISL_735030 | UZ Leuven, National Reference Laboratory for Coronaviruses, Laboratory Medicine, Leuven, Belgium                  | KU Leuven, Rega Institute, Clinical and Epidemiological Virology                                                                  | Tony Wawina-Bokalanga, Joan Marti-Carreras, Bert Vanmechelen, Piet Maes                                                                                                                                                                                                                                                                                                                                                                                    |
| EPI_ISL_736933, EPI_ISL_736948, EPI_ISL_736975, EPI_ISL_736976 | NHLS-IALCH                                                                                                        | KRISP, KZN Research Innovation and Sequencing Platform                                                                            | Giandhari J, Pillay S, Lessells R, ChimukangaraB, Mdlalose K, York D, Khan S, Tegally H, Wilkinson E, de Oliveira T                                                                                                                                                                                                                                                                                                                                        |
| EPI_ISL_737207                                                 | National Reference Laboratory, Nigeria Centre for Disease Control.                                                | National Reference Laboratory, Nigeria Centre for Disease Control, Gaduwa, Abuja, Nigeria                                         | Dr Ndodo Nnaemeka, Olusola Akanbi, Chimaobi Chukwu, Dr Adesuyi Omoare, Shirlee Wohl, Anthony Ahumbe, Abdulmajid Musa, Nneamaka Uba, Bamidele Olurunfemi, Kingsley Madubuikwe, Dr Sikiru Badaru, Adama Ahmad, Michael Popoola, Dr Chikwe Ihekweazu                                                                                                                                                                                                          |
| EPI_ISL_737211                                                 | Department of Virology and Immunology, University of Helsinki and Helsinki University Hospital, HUSLAB Finland    | Department of Virology, Faculty of Medicine, University of Helsinki, Helsinki, Finland                                            | Teemu Smura, Ravi Kant, Phuoc Truong, Hussein Alburkat, Hannimari Kallio-Kokko, Jenni Virtanen, Maija Suvanto, Sari Hannula, Harri Kangas, Pekka Ellonen, Olli Vapalahti                                                                                                                                                                                                                                                                                   |

|                                                                                |                                                                                                                                                                                         |                                                                                                                                                                                         |                                                                                                                                                                                                                                                                                                                                                                                                                                                                                                                                                                                                                                                                                                                                                                                                    |
|--------------------------------------------------------------------------------|-----------------------------------------------------------------------------------------------------------------------------------------------------------------------------------------|-----------------------------------------------------------------------------------------------------------------------------------------------------------------------------------------|----------------------------------------------------------------------------------------------------------------------------------------------------------------------------------------------------------------------------------------------------------------------------------------------------------------------------------------------------------------------------------------------------------------------------------------------------------------------------------------------------------------------------------------------------------------------------------------------------------------------------------------------------------------------------------------------------------------------------------------------------------------------------------------------------|
| EPI_ISL_738012                                                                 | Uganda Central Public Health Lab and Uganda Virus Research Institute                                                                                                                    | MRC/UVRI & LSHTM Uganda Research Unit                                                                                                                                                   | Matthew Cotten, Dan Lule Bugembe, My V.T. Phan, Pontiano Kaleebu et al.                                                                                                                                                                                                                                                                                                                                                                                                                                                                                                                                                                                                                                                                                                                            |
| EPI_ISL_738047, EPI_ISL_738048                                                 | SIESP CHIETI - DRIVE IN ORTONA                                                                                                                                                          | Istituto Zooprofilattico Sperimentale dell'Abruzzo e Molise "G. Caporale"                                                                                                               | Lorusso A, Marcacci M, Di Domenico M, Ancora M, Curini V, Mangone I, Rinaldi A, Di Pasquale A, Cammà C, Puglia I, Savini G                                                                                                                                                                                                                                                                                                                                                                                                                                                                                                                                                                                                                                                                         |
| EPI_ISL_740053, EPI_ISL_740488, EPI_ISL_744135, EPI_ISL_744511, EPI_ISL_744971 | Laboratoire national de santé, Microbiology, Virology                                                                                                                                   | Laboratoire national de santé, Microbiology, Microbial Genomics Platform                                                                                                                | Anke Wienecke-Baldacchino, Catherine Ragimbeau, Jessica Tapp, Fatu Djabi, Lise Pignon, Raoul Salmon, Tamir Abdelrahman                                                                                                                                                                                                                                                                                                                                                                                                                                                                                                                                                                                                                                                                             |
| EPI_ISL_745146                                                                 | Vredendal Hospital wc VRE                                                                                                                                                               | National Health Laboratory Service (NHLS), Tygerberg                                                                                                                                    | Susan Engelbrecht, Kayla Delaney, Bronwyn Kleinhans, Houriyah Tegally, Eduan Wilkindon, Gert van Zyl, Wolfgang Preiser, Tulio de Oliveira                                                                                                                                                                                                                                                                                                                                                                                                                                                                                                                                                                                                                                                          |
| EPI_ISL_745150                                                                 | Tygerberg Hospital wc TBH                                                                                                                                                               | National Health Laboratory Service (NHLS), Tygerberg                                                                                                                                    | Susan Engelbrecht, Kayla Delaney, Bronwyn Kleinhans, Houriyah Tegally, Eduan Wilkindon, Gert van Zyl, Wolfgang Preiser, Tulio de Oliveira                                                                                                                                                                                                                                                                                                                                                                                                                                                                                                                                                                                                                                                          |
| EPI_ISL_745153                                                                 | CoVid EC Nelson Mandela Bay Metro                                                                                                                                                       | National Health Laboratory Service (NHLS), Tygerberg                                                                                                                                    | Susan Engelbrecht, Kayla Delaney, Bronwyn Kleinhans, Houriyah Tegally, Eduan Wilkindon, Gert van Zyl, Wolfgang Preiser, Tulio de Oliveira                                                                                                                                                                                                                                                                                                                                                                                                                                                                                                                                                                                                                                                          |
| EPI_ISL_745157                                                                 | SAS Saldanha VPA                                                                                                                                                                        | National Health Laboratory Service (NHLS), Tygerberg                                                                                                                                    | Susan Engelbrecht, Kayla Delaney, Bronwyn Kleinhans, Houriyah Tegally, Eduan Wilkindon, Gert van Zyl, Wolfgang Preiser, Tulio de Oliveira                                                                                                                                                                                                                                                                                                                                                                                                                                                                                                                                                                                                                                                          |
| EPI_ISL_745182, EPI_ISL_745183, EPI_ISL_745184                                 | Tygerberg Hospital wc TBH                                                                                                                                                               | National Health Laboratory Service (NHLS), Tygerberg                                                                                                                                    | Susan Engelbrecht, Kayla Delaney, Bronwyn Kleinhans, Houriyah Tegally, Eduan Wilkindon, Gert van Zyl, Wolfgang Preiser, Tulio de Oliveira                                                                                                                                                                                                                                                                                                                                                                                                                                                                                                                                                                                                                                                          |
| EPI_ISL_745713                                                                 | Ginkgo Bioworks Clinical Laboratory                                                                                                                                                     | Utah Public Health Laboratory                                                                                                                                                           | Erin L. Young, Kelly Oakeson, Tara Gallagher, Michael T. Pyne, E. Susan Slechta, Melanie A. Mallory, Jeffrey B. Stevenson, Salika M. Shaker, David R. Hillyard, Malaika McKenzie-Bennett, James McGann, Jim Griffin, Keith Robison, Alex Plocik, Becky Schilling, Martha Pierson, Rebecca Littlefield, Michelle Spencer, Birgitte Simen                                                                                                                                                                                                                                                                                                                                                                                                                                                            |
| EPI_ISL_746596, EPI_ISL_746623, EPI_ISL_746695, EPI_ISL_746714                 | Genetica Molecular and Subdepartamento de Virologia ISP Chile                                                                                                                           | Instituto de Salud Publica de Chile                                                                                                                                                     | Javier Tognarelli, Barbara Parra, Loredana Arata, Jaime Lagos, Gisselle Barra, Patricia Bustos, Rodrigo Fasce, Andres Castillo, Jorge Fernandez                                                                                                                                                                                                                                                                                                                                                                                                                                                                                                                                                                                                                                                    |
| EPI_ISL_751209                                                                 | Pathogen Genomics Lab King Abdullah University of Science and Technology(KAUST)                                                                                                         | Pathogen Genomics Lab King Abdullah University of Science and Technology(KAUST)                                                                                                         | Sara Mfarrej, Olga Douvropoulou, Raushan Nugmanova, Raaeece Naeem, Sharif Hala, Fadwa Alofat, Asim Khogeer, Afrah Alsomali, Jumana Taha, Abdulaziz Alahmadi, Kahled Alghithami, Anwar Hashem, Naif Almontashiri, Arnab Pain                                                                                                                                                                                                                                                                                                                                                                                                                                                                                                                                                                        |
| EPI_ISL_753971                                                                 | Charité Universitätsmedizin Berlin, Institut für Virologie/Labor Berlin                                                                                                                 | Charité Universitätsmedizin Berlin, Institut für Virologie Berlin                                                                                                                       | Victor M Corman, Jörn Beheim-Schwarzbach, Barbara Mühlemann, Julia Schneider, Talitha Veith, Terry Jones, Christian Drosten                                                                                                                                                                                                                                                                                                                                                                                                                                                                                                                                                                                                                                                                        |
| EPI_ISL_754181                                                                 | Department for Virology, Molecular Biology and Genome Research, R. G. Lugar Center for Public Health Research, National Center for Disease Control and Public Health (NCDC) of Georgia. | Department for Virology, Molecular Biology and Genome Research, R. G. Lugar Center for Public Health Research, National Center for Disease Control and Public Health (NCDC) of Georgia. | Meri Pantsulaia, Nino Berishvili, Tata Imnadze, Giorgi Tomashvili, Ana Papkiuri, Gvantsa Brachveli, Gvantsa Chanturia, Ann Machabishvili, Nato Kotaria, Marine Murtskhaladze, Lela Sabadze, Mari Gavashelidze, Tamar Jashiasvili, Tea Tevdoradze, Ketevan Sidamonidze, Ekaterine Khmaladze, Ekaterine Zhghenti, Roena Sukhiasvili, Mariam Zakalashvili, Lela Urushadze, Magda Dgebuadze, Davit Tsiguria, Ekaterine Zangaladze, Adam Kotorashvili, Maia Alkhazashvili, Irma Burjanadze, Anna Kasradze, Khatuna Zakhshvili, Paata Imnadze, Amiran Gamkrelidze.                                                                                                                                                                                                                                       |
| EPI_ISL_755903                                                                 | Toronto Invasive Bacterial Diseases Network                                                                                                                                             | McMaster University                                                                                                                                                                     | Allison McGeer, Patryk Aftanas, Hooman Derakhshani, Angel Li, Kuganya Nirmalarajah, Emily Panousis, Ahmed Draia, Jalees Nasir, Michael Surette, Samira Mubareka, Andrew G. McArthur                                                                                                                                                                                                                                                                                                                                                                                                                                                                                                                                                                                                                |
| EPI_ISL_756109                                                                 | Department of Virology and Immunology, University of Helsinki and Helsinki University Hospital, Huslab Finland                                                                          | Department of Virology, Faculty of Medicine, University of Helsinki, Helsinki, Finland                                                                                                  | Teemu Smura, Ravi Kant, Phuoc Truong, Hussein Alburkat, Hannimari Kallio-Kokko, Jenni Virtanen, Maija Suvanto, Sari Hannula, Harri Kangas, Pekka Ellonen, Olli Vapalahti                                                                                                                                                                                                                                                                                                                                                                                                                                                                                                                                                                                                                           |
| EPI_ISL_759896                                                                 | Queen Elizabeth Hospital                                                                                                                                                                | Hong Kong Department of Health                                                                                                                                                          | Alan K.L. Tsang, Peter C.W. Yip, Edman T.K. Lam, Rickjason C.W. Chan, Dominic N.C. Tsang                                                                                                                                                                                                                                                                                                                                                                                                                                                                                                                                                                                                                                                                                                           |
| EPI_ISL_760058                                                                 | Hong Kong Department of Health                                                                                                                                                          | School of Public Health, The University of Hong Kong                                                                                                                                    | Daniel Chu, Haoguo Gu, Pavithra Krishnan, Daisy Ng, Gigi Liu, Carrie Wan, Malik Peiris, Leo Poon                                                                                                                                                                                                                                                                                                                                                                                                                                                                                                                                                                                                                                                                                                   |
| EPI_ISL_760203                                                                 | Division of Emerging Infectious Diseases, Bureau of Infectious Diseases Diagnosis Control, Korea Disease Control and Prevention Agency                                                  | Division of Emerging Infectious Diseases, Bureau of Infectious Diseases Diagnosis Control, Korea Disease Control and Prevention Agency                                                  | Ae Kyung Park, Il-Hwan Kim, Heui Man Kim, Jeong-Min Kim, Namjoo Lee, Chaeyoung Lee, Sang Hee Woo, Eun-Jin Kim                                                                                                                                                                                                                                                                                                                                                                                                                                                                                                                                                                                                                                                                                      |
| EPI_ISL_768642, EPI_ISL_768655, EPI_ISL_779221                                 | Pathogen Genomics Center, National Institute of Infectious Diseases                                                                                                                     | Pathogen Genomics Center, National Institute of Infectious Diseases                                                                                                                     | Tsuyoshi Sekizuka, Kentaro Itokawa, Rina Tanaka, Masanori Hashino, Makoto Kuroda                                                                                                                                                                                                                                                                                                                                                                                                                                                                                                                                                                                                                                                                                                                   |
| EPI_ISL_779606                                                                 | Victorian Infectious Diseases Reference Laboratory (VIDRL)                                                                                                                              | VIDRL and MDU-PHL                                                                                                                                                                       | Caly L., Seemann T., Sait, M.L., Druce J., Sherry, N.L.                                                                                                                                                                                                                                                                                                                                                                                                                                                                                                                                                                                                                                                                                                                                            |
| EPI_ISL_779669                                                                 | Pathogen Genomics Center, National Institute of Infectious Diseases                                                                                                                     | Pathogen Genomics Center, National Institute of Infectious Diseases                                                                                                                     | Tsuyoshi Sekizuka, Kentaro Itokawa, Rina Tanaka, Masanori Hashino, Makoto Kuroda                                                                                                                                                                                                                                                                                                                                                                                                                                                                                                                                                                                                                                                                                                                   |
| EPI_ISL_790630                                                                 | Dutch COVID-19 response team                                                                                                                                                            | National Institute for Public Health and the Environment (RIVM)                                                                                                                         | Adam Meijer, Harry Vennema, Jeroen Cremer, Sharon van den Brink, Bas van der Veer, AnneMarie van den Brandt, Florian Zwagemaker, Dennis Schmitz, Chantal Reusken, on behalf of the national COVID-19 response team                                                                                                                                                                                                                                                                                                                                                                                                                                                                                                                                                                                 |
| EPI_ISL_791989                                                                 | RSUD Waluyo Jati Kota Kraksaan, Jawa Timur                                                                                                                                              | National Institute of Health Research and Development                                                                                                                                   | Subangkit;Pawestri,HA;kawati,HD;Nugraha,AA;Puspa,KD;Muhashonah,I;Pangesti,KNA;Soekarso,T;Puspandari,N;Setiawaty,V                                                                                                                                                                                                                                                                                                                                                                                                                                                                                                                                                                                                                                                                                  |
| EPI_ISL_794321                                                                 | UZ Leuven, National Reference Laboratory for Coronaviruses, Laboratory Medicine, Leuven, Belgium                                                                                        | KU Leuven, Rega Institute, Clinical and Epidemiological Virology                                                                                                                        | Tony Wawina-Bokalanga, Joan Marti-Carreras, Bert Vanmechelen, Piet Maes                                                                                                                                                                                                                                                                                                                                                                                                                                                                                                                                                                                                                                                                                                                            |
| EPI_ISL_794818, EPI_ISL_794820                                                 | Greek Genome Center, Biomedical Research Foundation of the Academy of Athens (BRFAA)                                                                                                    | Greek Genome Center, Biomedical Research Foundation of the Academy of Athens (BRFAA)                                                                                                    | Emmanouil Athanasiadis, Ioannis Vatsellas, Thodoris Loupis, Christina Maria Kravvari, Katerina Zoi, Dimitrios Thanos                                                                                                                                                                                                                                                                                                                                                                                                                                                                                                                                                                                                                                                                               |
| EPI_ISL_796130                                                                 | Laboratorio de Microbiología. Hospital General Universitario de Elda, Alicante                                                                                                          | SeqCOVID-SPAIN consortium/IBV(CSIC)                                                                                                                                                     | Mª Isabel Gascón Ros, Cristina Torregrosa Hetland, Eva Pastor Boix, Paloma Cascales Ramos and SeqCOVID-SPAIN consortium                                                                                                                                                                                                                                                                                                                                                                                                                                                                                                                                                                                                                                                                            |
| EPI_ISL_796663                                                                 | Dept. of Medical Microbiology, Stavanger University Hospital, Helse Stavanger HF                                                                                                        | Norwegian Institute of Public Health, Department of Virology                                                                                                                            | Kathrine Stene-Johansen, Kamilla Heddeland Instefjord, Hilde Elshaug, Atiya R Ali,Marie Paulsen Madsen, Rasmus Riis Kopperud, Hilde Vollan, Karoline Bragstad, Olav Hungnes                                                                                                                                                                                                                                                                                                                                                                                                                                                                                                                                                                                                                        |
| EPI_ISL_801343                                                                 | Lighthouse Lab in Glasgow                                                                                                                                                               | Wellcome Sanger Institute for the COVID-19 Genomics UK (COG-UK) Consortium                                                                                                              | Harper VanSteenhouse, Yumi Kasai, David Gray, Carol Clugston, Anna Dominiczak and Alex Alderton, Roberto Amato, Sonia Goncalves, Ewan Harrison, David K. Jackson, Ian Johnston, Dominic Kwiatkowski, Cordelia Langford, John Sillitoe on behalf of the Wellcome Sanger Institute COVID-19 Surveillance Team                                                                                                                                                                                                                                                                                                                                                                                                                                                                                        |
| EPI_ISL_802318                                                                 | MSHS Clinical Microbiology Laboratories                                                                                                                                                 | MSHS Pathogen Surveillance Program                                                                                                                                                      | Ana S. Gonzalez-Reiche, Hala Alshammary, Mitchell J. Sullivan, Brianne Ciferri, Ajay Obla, Angela Amoako, Mahmoud Awawda, Elena Hirsch, Ashley S. Salimbangon, Levy Sominsky, Katherine Beach, Kayla Russo, Charles Gleason, Shelcie Fabre, Giulio Kleiner, Zenab Khan, Bremy Alburquerque, Adriana van de Guchte, Komal Srivastava, Matthew M. Hernandez, Jayeeta Dutta, Denise Jurczynszak, Emily Ferreri, Rachel Chernet, Nancy Francoeur, Betsaida Salom Melo, Irina Oussenko, Gintaras Deikus, Juan Soto, Shwetha Hara Sridhar, Ying-Chih Wang, Kathryn Twyman, Andrew Kasarskis, Deena R. Altman, Robert Sebra, Adolfo Garcia-Sastre, Marta Luksza, Gopi Patel, Sarah Schaefer, Melissa Gitman, Michael D. Nowak, Alberto Paniz-Mondolfi, Emilia Mia Sordillo, Viviana Simon, Harm van Bakel |
| EPI_ISL_806544                                                                 | INSPI Instituto Nacional de Investigación en Salud Pública                                                                                                                              | Av. Julián Coronel 905 entre Esmeraldas y José Mascote Av. Juan Tanca Marengo No. 100 y Av. de las Américas                                                                             | Leandro Patiño, Doménica de Mora, Maritza Olmedo, Andrés Carrazzo, Orson Mestanza, Mary Regato, Melissa Zambrano, Manuel González, Alfredo Bruno, Alberto Orlando                                                                                                                                                                                                                                                                                                                                                                                                                                                                                                                                                                                                                                  |
| EPI_ISL_806640                                                                 | KEMRI-Wellcome Trust Research Programme/KEMRI-CGMR-C Kilifi                                                                                                                             | KEMRI-Wellcome Trust Research Programme/KEMRI-CGMR-C Kilifi                                                                                                                             | Githinji et al                                                                                                                                                                                                                                                                                                                                                                                                                                                                                                                                                                                                                                                                                                                                                                                     |
| EPI_ISL_811140, EPI_ISL_811142                                                 | Ministry of Health Turkey                                                                                                                                                               | Ministry of Health Turkey                                                                                                                                                               | Fatma Bayraktar, Yasemin Cogun, Süleyman Yalcin, Aye Baak Alta, Gülay Korukluolu                                                                                                                                                                                                                                                                                                                                                                                                                                                                                                                                                                                                                                                                                                                   |
| EPI_ISL_812833                                                                 | Genomics Program, Children Cancer Hospital                                                                                                                                              | Genomics Program, Children Cancer Hospital                                                                                                                                              | Hatem,A., Hadad,A., Abouelnaga,S., Amer,K., Salah,H., Farawylia,H., Halafawy,A., Mansour,T., shalaby,L., Hassan,W., Soliman,M., Gomaa,C., Hassan,R., Soliman,S., Monuir,G., Hammad,M., Hussein,S., Abdo,I., Jalal,D., El-Zayat,M., El-Shaqnqery,H., Diab,A., Bakry,U., Samir,O., Magdeldin,S., Sayed,A.                                                                                                                                                                                                                                                                                                                                                                                                                                                                                            |
| EPI_ISL_815255, EPI_ISL_815373, EPI_ISL_815390                                 | Centogene                                                                                                                                                                               | Centogene                                                                                                                                                                               | Peter Bauer, Krishna Kumar Kandaswamy, Vivi Hue-Trang Lieu                                                                                                                                                                                                                                                                                                                                                                                                                                                                                                                                                                                                                                                                                                                                         |
| EPI_ISL_825060                                                                 | NHL Municipal Medical College, Ahmedbad                                                                                                                                                 | Gujarat Biotechnology Research Centre                                                                                                                                                   | Nikha Trivedi, Apurvashin Puvar, Ramesh Pandit, Janvi Raval, Zarna Patel, Nitin Savaliya, Dinesh Kumar, Zuber Saiyed, Afzal Ansari, Jayshri Pethani, Monila Patel, Atit Shah, NM Shaikh, Bimal Chauhan, Tanmay Mehta, Bhavin Prajapati, Chaitanya Joshi, Madhvi Joshi                                                                                                                                                                                                                                                                                                                                                                                                                                                                                                                              |



|                                                                                                                                                                |                                                                                                                                                                                  |                                                                                                                                                                                  |                                                                                                                                                                                                                                                                                                                                                                                                                                                                                                                                                                                                                                                                                                                                                                                                                                   |
|----------------------------------------------------------------------------------------------------------------------------------------------------------------|----------------------------------------------------------------------------------------------------------------------------------------------------------------------------------|----------------------------------------------------------------------------------------------------------------------------------------------------------------------------------|-----------------------------------------------------------------------------------------------------------------------------------------------------------------------------------------------------------------------------------------------------------------------------------------------------------------------------------------------------------------------------------------------------------------------------------------------------------------------------------------------------------------------------------------------------------------------------------------------------------------------------------------------------------------------------------------------------------------------------------------------------------------------------------------------------------------------------------|
| EPI_ISL_825131, EPI_ISL_825468                                                                                                                                 | NHLS-IALCH                                                                                                                                                                       | KRISP, KZN Research Innovation and Sequencing Platform                                                                                                                           | Giandhari J, Pillay S, Lessells R, Mdlalose K, York D, Khan S, Tegally H, Wilkinson E, de Oliveira T                                                                                                                                                                                                                                                                                                                                                                                                                                                                                                                                                                                                                                                                                                                              |
| EPI_ISL_827042                                                                                                                                                 | Institute of Virology, University of Cologne                                                                                                                                     | Institute of Virology, University of Cologne                                                                                                                                     | Saleta Sierra, Gibran Rubio, Zevanya Tesselonica, Dominik Aschenmeier, Eva Heger, Elena Knops, Rolf Kaiser, Martin Däumer, Alex Thielen                                                                                                                                                                                                                                                                                                                                                                                                                                                                                                                                                                                                                                                                                           |
| EPI_ISL_827045                                                                                                                                                 | The National University Hospital of Iceland                                                                                                                                      | deCODE genetics                                                                                                                                                                  | Daniel F Gudbjartsson; Agnar Helgason; Hakon Jonsson; Olafur T Magnusson; Pall Melsted; Gudmundur L Norrdahl; Jona Saemundsdottir; Asgeir Sigurdsson; Patrick Sulem; Arna B Agustsdottir; Hannes Eggertsson; Berglind Eiriksdothir; Run Fridriksdottir; Elisabet E Gardarsdottir; Gudmundur Georgsson; Olafía S Gretarsdottir; Kjartan R Gudmundsson; Thora R Gunnarsdottir; Arnaldur Gylfason; Hilma Holm; Brynjar O Jensson; Aslaug Jonasdottir; Kamilla S Josefsdottir; Thordur Kristjansson; Droplaug N Magnusdottir; Solvi Rognvaldsson; Louise le Roux; Gudrun Sigmundsdottir; Gardar Sveinbjornsson; Kristin E Sveinsdottir; Maney Sveinsdottir; Emil A Thorarensen; Bjarni Thorbjornsson; Gisli Masson; Ingileif Jonsdottir; Alma Moller; Thorolfur Gudnason; Karl G Kristinsson; Unnur Thorsteinsdottir; Kari Stefansson |
| EPI_ISL_828597, EPI_ISL_829968                                                                                                                                 | deCODE genetics                                                                                                                                                                  | deCODE genetics                                                                                                                                                                  | Daniel F Gudbjartsson; Agnar Helgason; Hakon Jonsson; Olafur T Magnusson; Pall Melsted; Gudmundur L Norrdahl; Jona Saemundsdottir; Asgeir Sigurdsson; Patrick Sulem; Arna B Agustsdottir; Hannes Eggertsson; Berglind Eiriksdothir; Run Fridriksdottir; Elisabet E Gardarsdottir; Gudmundur Georgsson; Olafía S Gretarsdottir; Kjartan R Gudmundsson; Thora R Gunnarsdottir; Arnaldur Gylfason; Hilma Holm; Brynjar O Jensson; Aslaug Jonasdottir; Kamilla S Josefsdottir; Thordur Kristjansson; Droplaug N Magnusdottir; Solvi Rognvaldsson; Louise le Roux; Gudrun Sigmundsdottir; Gardar Sveinbjornsson; Kristin E Sveinsdottir; Maney Sveinsdottir; Emil A Thorarensen; Bjarni Thorbjornsson; Gisli Masson; Ingileif Jonsdottir; Alma Moller; Thorolfur Gudnason; Karl G Kristinsson; Unnur Thorsteinsdottir; Kari Stefansson |
| EPI_ISL_831973                                                                                                                                                 | Klinisk mikrobiologi                                                                                                                                                             | The Public Health Agency of Sweden                                                                                                                                               | Department of Microbiology, The Public Health Agency of Sweden                                                                                                                                                                                                                                                                                                                                                                                                                                                                                                                                                                                                                                                                                                                                                                    |
| EPI_ISL_833194                                                                                                                                                 | Hôpital Bichat Claude Bernard, Laboratoire de Virologie                                                                                                                          | IAME UMR1137 Inserm, Université de Paris, Hôpital Bichat                                                                                                                         | Antoine Bridier, Amélie Recoing, Quentin Le Hingrat, Lena Daniel, Siham Hamri, Gilles Collin, Alexandre Storto, Mélanie Bertine, Charlotte Charpentier, Nadhira Houhou-Fidouh, Diane Descamps, Benoit Visseaux                                                                                                                                                                                                                                                                                                                                                                                                                                                                                                                                                                                                                    |
| EPI_ISL_837285                                                                                                                                                 | Istituto Zooprofilattico Sperimentale del Mezzogiorno                                                                                                                            | TIGEM                                                                                                                                                                            | Antonio Grimaldi, Patrizia Annunziata, Francesco Panariello, Biancamaria Pierri, Valentina Bouche, Chiara Colantuono, Maria Concetta Cuomo, Denise Di Concilio, Lucio Di Filippo, Anna Manfredi, Marcello Salvi, Antonio Limone, Pellegrino Cerino, Andrea Ballabio, Davide Cacchiarelli.                                                                                                                                                                                                                                                                                                                                                                                                                                                                                                                                         |
| EPI_ISL_844979                                                                                                                                                 | Department of Virus and Microbiological Special Diagnostics, Statens Serum Institut, Copenhagen, Denmark                                                                         | Albertsen Lab, Department of Chemistry and Bioscience, Aalborg University, Denmark                                                                                               | Danish Covid-19 Genome Consortium                                                                                                                                                                                                                                                                                                                                                                                                                                                                                                                                                                                                                                                                                                                                                                                                 |
| EPI_ISL_848199                                                                                                                                                 | Microbiology Department, Complexo Hospitalario Universitario de Vigo                                                                                                             | Microbiology Department, Complexo Hospitalario Universitario de Vigo                                                                                                             | Microbiology Department, Complexo Hospitalario Universitario de Vigo (CHUVI). EPICOVIGAL.                                                                                                                                                                                                                                                                                                                                                                                                                                                                                                                                                                                                                                                                                                                                         |
| EPI_ISL_849128, EPI_ISL_849146                                                                                                                                 | Florida Bureau of Public Health Laboratories                                                                                                                                     | Florida Bureau of Public Health Laboratories                                                                                                                                     | Sarah Schmedes, Jason Blanton                                                                                                                                                                                                                                                                                                                                                                                                                                                                                                                                                                                                                                                                                                                                                                                                     |
| EPI_ISL_851702                                                                                                                                                 | Lighthouse Lab in Alderley Park                                                                                                                                                  | Wellcome Sanger Institute for the COVID-19 Genomics UK (COG-UK) Consortium                                                                                                       | Jacquelyn Wynn, Mairead Hyland, The Lighthouse Lab in Alderley Park and Alex Alderton, Roberto Amato, Sonia Goncalves, Ewan Harrison, David K. Jackson, Ian Johnston, Dominic Kwiatkowski, Cordelia Langford, John Sillitoe on behalf of the Wellcome Sanger Institute COVID-19 Surveillance Team                                                                                                                                                                                                                                                                                                                                                                                                                                                                                                                                 |
| EPI_ISL_853287                                                                                                                                                 | UPMC Clinical Microbiology Laboratory                                                                                                                                            | Microbial Genome Sequencing Center; Microbial Genomic Epidemiology Laboratory                                                                                                    | Mustapha M. Mustapha, Jane W. Marsh, Dan Snyder, Marissa P. Griffith, Stephanie L. Mitchell, Vatsala R. Srinivasa, Kady D. Waggle, Chinele Ezeonwuku, Vaughn S. Cooper, Lee H. Harrison                                                                                                                                                                                                                                                                                                                                                                                                                                                                                                                                                                                                                                           |
| EPI_ISL_854230                                                                                                                                                 | Department of Microbiology, University Innsbruck                                                                                                                                 | Bergthaler laboratory, CeMM Research Center for Molecular Medicine of the Austrian Academy of Sciences                                                                           | Lukas Endler, Alexandra Popa, Benedikt Agerer, Jakob-Wendelin Genger, Alexander Lercher, Anna Schedl, Thomas Penz, Michael Schuster, Jan Laine, Martin Senekowitsch, Christoph Bock, Andreas Bergthaler                                                                                                                                                                                                                                                                                                                                                                                                                                                                                                                                                                                                                           |
| EPI_ISL_855561, EPI_ISL_855571                                                                                                                                 | Department of Virology, Principal Military Hospital of Instruction of Tunis                                                                                                      | Bundeswehr Institute of Microbiology                                                                                                                                             | Susann Handrick, Malena Bestehorn-Willmann, Simone Eckstein, Mathias C. Walter, Markus H. Antwerpen, Habiba Najja, Kilian Stoecker, Roman Wölfel & Mohamed Ben Moussa                                                                                                                                                                                                                                                                                                                                                                                                                                                                                                                                                                                                                                                             |
| EPI_ISL_856678                                                                                                                                                 | Charité Universitätsmedizin Berlin, Institute of Virology, Charitéplatz 1, 10117 Berlin, Germany                                                                                 | Charité Universitätsmedizin Berlin, Institute of Virology, Charitéplatz 1, 10117 Berlin, Germany                                                                                 | Victor M Corman, Julia Schneider, Jörn Beheim-Schwarzbach, Tobias Bleicker, Julia Tesch, Barbara Mühlemann, Talitha Veith, Terry Jones, Christian Drosten                                                                                                                                                                                                                                                                                                                                                                                                                                                                                                                                                                                                                                                                         |
| EPI_ISL_859563, EPI_ISL_859565, EPI_ISL_859714, EPI_ISL_859762, EPI_ISL_859786, EPI_ISL_859787, EPI_ISL_859799, EPI_ISL_859803, EPI_ISL_859852, EPI_ISL_859885 | BTC, Khalifa University                                                                                                                                                          | BTC, Khalifa University                                                                                                                                                          | Al Safar et al                                                                                                                                                                                                                                                                                                                                                                                                                                                                                                                                                                                                                                                                                                                                                                                                                    |
| EPI_ISL_860557                                                                                                                                                 | NHLS-IALCH                                                                                                                                                                       | KRISP, KZn Research Innovation and Sequencing Platform                                                                                                                           | Giandhari J, Pillay S, Lessells R, Mdlalose K, York D, Khan S, Tegally H, Wilkinson E, de Oliveira T                                                                                                                                                                                                                                                                                                                                                                                                                                                                                                                                                                                                                                                                                                                              |
| EPI_ISL_860810                                                                                                                                                 | WHO/Minsk                                                                                                                                                                        | Charité Universitätsmedizin Berlin, Institut für Virologie                                                                                                                       | Victor M Corman, Barbara Mühlemann, Jörn Beheim-Schwarzbach, Talitha Veith, Julia Tesch, Tobias Bleicker, Julia Schneider, Shmaliyova Natalia, Sivets Natalia, Terry Jones, Christian Drosten                                                                                                                                                                                                                                                                                                                                                                                                                                                                                                                                                                                                                                     |
| EPI_ISL_862552                                                                                                                                                 | Complejo Hospitalario de Navarra                                                                                                                                                 | Instituto de Salud Carlos III                                                                                                                                                    | Iglesias-Caballero, M.Camarero, S. Molinero Calamita, M. González-Esguevillas, M. Pozo, F. Casas, I. Jiménez, P. Jiménez, M. Zaballos, A. Monzón, S. Varona, S. Juliá, M. Cuesta, I. Ezpeleta, C.                                                                                                                                                                                                                                                                                                                                                                                                                                                                                                                                                                                                                                 |
| EPI_ISL_864256                                                                                                                                                 | Lighthouse Lab in Milton Keynes                                                                                                                                                  | Wellcome Sanger Institute for the COVID-19 Genomics UK (COG-UK) Consortium                                                                                                       | The Lighthouse Lab in Milton Keynes and Alex Alderton, Roberto Amato, Sonia Goncalves, Ewan Harrison, David K. Jackson, Ian Johnston, Dominic Kwiatkowski, Cordelia Langford, John Sillitoe on behalf of the Wellcome Sanger Institute COVID-19 Surveillance Team                                                                                                                                                                                                                                                                                                                                                                                                                                                                                                                                                                 |
| EPI_ISL_869249                                                                                                                                                 | UMMC-Health                                                                                                                                                                      | WHO National Influenza Centre Russian Federation                                                                                                                                 | Andrey Komissarov, Artem Fadeev, Anna Ivanova, Kseniya Komissarova, Dmitry Bazhenov, Mikhail Bakaev, Tatiana Platonova, Daria Danilenko, Ksenia Safina, Elena Nabieva, Georgii Bazykin, Dmitry Lioznov                                                                                                                                                                                                                                                                                                                                                                                                                                                                                                                                                                                                                            |
| EPI_ISL_884484                                                                                                                                                 | Molecular Microbiology & Immunology, University of Missouri                                                                                                                      | Molecular Microbiology & Immunology, University of Missouri                                                                                                                      | Tang,C.Y., Li,T., Hang,J., Lidl,G.M., Wan,X.-F.                                                                                                                                                                                                                                                                                                                                                                                                                                                                                                                                                                                                                                                                                                                                                                                   |
| EPI_ISL_887443                                                                                                                                                 | Instituto Nacional de Saude (INS), Mozambique                                                                                                                                    | KRISP, KZN Research Innovation and Sequencing Platform                                                                                                                           | Nalia Ismael, Nadia Siteo, Paulo Amaldo, Nedio Mabunda, Giandhari J, Pillay S, Tegally H, Wilkinson E, de Oliveira T                                                                                                                                                                                                                                                                                                                                                                                                                                                                                                                                                                                                                                                                                                              |
| EPI_ISL_888831                                                                                                                                                 | National Virus Reference Laboratory                                                                                                                                              | National Virus Reference Laboratory                                                                                                                                              | Michael Carr, Gabriel Gonzalez, Jonathan Dean, Cillian F De Gascun                                                                                                                                                                                                                                                                                                                                                                                                                                                                                                                                                                                                                                                                                                                                                                |
| EPI_ISL_890102                                                                                                                                                 | Laboratoire de santé publique du Québec                                                                                                                                          | Laboratoire de santé publique du Québec                                                                                                                                          | Sandrine Moreira, Ioannis Ragoussis, Guillaume Bourque, Jesse Shapiro, Mark Lathrop and Michel Roger on behalf of the CoVSeQ research group                                                                                                                                                                                                                                                                                                                                                                                                                                                                                                                                                                                                                                                                                       |
| EPI_ISL_895789                                                                                                                                                 | Molecular biology division, Institute of Clinical Biochemistry and Diagnostics, Charles University, Faculty of Medicine in Hradec Králové and University Hospital Hradec Králové | Molecular biology division, Institute of Clinical Biochemistry and Diagnostics, Charles University, Faculty of Medicine in Hradec Králové and University Hospital Hradec Králové | Helena Kovaříková, Petr Brož, Ivana Baranová, Kateřina Hrochová, Tereza Baková, Jitka Novotná, Kateřina Pehlíková, Vladimír Palíka. Cooperation project with BioVendor-R&D and bioinformatics company BIOXSYS s.r.o.                                                                                                                                                                                                                                                                                                                                                                                                                                                                                                                                                                                                              |
| EPI_ISL_896105, EPI_ISL_896114                                                                                                                                 | Viollier AG                                                                                                                                                                      | University Hospital Basel, Clinical Bacteriology                                                                                                                                 | Tim Roloff, Madlen Stange, Helena MB Seth-Smith, Alfredo Mari, Karoline Leuzinger, Julia Bielicki, Christiane Beckmann, Manuel Battegay, Hans Hirsch, Adrian Egli                                                                                                                                                                                                                                                                                                                                                                                                                                                                                                                                                                                                                                                                 |
| EPI_ISL_896173, EPI_ISL_900203                                                                                                                                 | MEPHI, Aix Marseille University                                                                                                                                                  | MEPHI, Aix Marseille University                                                                                                                                                  | Anthony LEVASSEUR                                                                                                                                                                                                                                                                                                                                                                                                                                                                                                                                                                                                                                                                                                                                                                                                                 |
| EPI_ISL_904262, EPI_ISL_904263                                                                                                                                 | Dutch COVID-19 response team                                                                                                                                                     | Erasmus Medical Center                                                                                                                                                           | Bas Oude Munnink, Reina Sikkema, David Nieuwenhuijse, Irina Chestakova, Anne van der Linden, Marjan Boter, Emmanuelle Munger, Corine GeurtsvanKessel, Annemiek van der Eijk, Richard Molenkamp, Marion Koopmans, on behalf of the Dutch national COVID-19 response team.                                                                                                                                                                                                                                                                                                                                                                                                                                                                                                                                                          |
| EPI_ISL_904943                                                                                                                                                 | Vilnius University Hospital Santaros Klinikos, Vilnius University                                                                                                                | Institute of Biotechnology, Life Sciences Center, Vilnius University                                                                                                             | Emilija Vasilūnaite, Milda Norkiene, Albertas Timinskas, Alma Gedvilaitė, Aurelija Zvirbliene, Daniel Naumovas, Laimonas Griskevičius                                                                                                                                                                                                                                                                                                                                                                                                                                                                                                                                                                                                                                                                                             |
| EPI_ISL_905071, EPI_ISL_905134                                                                                                                                 | Dutch COVID-19 response team                                                                                                                                                     | National Institute for Public Health and the Environment (RIVM)                                                                                                                  | Adam Meijer, Harry Vennema, Dirk Eggink, Jeroen Cremer, Sharon van den Brink, Bas van der Veer, AnneMarie van den Brandt, Florian Zwagemaker, Dennis Schmitz, Chantal Reusken, on behalf of the national COVID-19 response team                                                                                                                                                                                                                                                                                                                                                                                                                                                                                                                                                                                                   |
| EPI_ISL_911548                                                                                                                                                 | ARUP laboratories                                                                                                                                                                | ARUP Laboratories                                                                                                                                                                | Hymas W, Slechta ES, Pyne MT, Mallory MA, Simmon KE, Shakir SM, Hillyard DR, Barker AP                                                                                                                                                                                                                                                                                                                                                                                                                                                                                                                                                                                                                                                                                                                                            |
| EPI_ISL_912831                                                                                                                                                 | Hôpital Henri Mondor                                                                                                                                                             | Department of Virology, Henri Mondor University Hospital, Assistance Publique Hôpitaux de Paris, Université Paris-Est Créteil, INSERM U955                                       | Christophe Rodriguez, Slim Fourati, Vanessa Demontant, Guillaume Gricourt, Melissa N'Debi, Alexandre Soulier, Elisabeth Trawinski, Jean-Michel Pawlowsky                                                                                                                                                                                                                                                                                                                                                                                                                                                                                                                                                                                                                                                                          |
| EPI_ISL_913035                                                                                                                                                 | Hospital San Pedro de Alcántara                                                                                                                                                  | Instituto de Salud Carlos III                                                                                                                                                    | Iglesias-Caballero, M. Camarero, S. Sandonis, V. Vázquez, S. Pozo, F. Casas, I. Jiménez, P. Zaballos, A. Monzón, S. Varona, S. Cuesta, I. Rodríguez, G.                                                                                                                                                                                                                                                                                                                                                                                                                                                                                                                                                                                                                                                                           |
| EPI_ISL_913066, EPI_ISL_913080                                                                                                                                 | Center for Virology                                                                                                                                                              | Center for Virology                                                                                                                                                              | Jeremy V. Camp, Irene Goerzer, Monika Redlberger-Fritz, Stephan W. Aberle                                                                                                                                                                                                                                                                                                                                                                                                                                                                                                                                                                                                                                                                                                                                                         |

|                                                |                                                                                                                  |                                                                                                            |                                                                                                                                                                                                                                                                                    |
|------------------------------------------------|------------------------------------------------------------------------------------------------------------------|------------------------------------------------------------------------------------------------------------|------------------------------------------------------------------------------------------------------------------------------------------------------------------------------------------------------------------------------------------------------------------------------------|
| EPI_ISL_913375                                 | The Public Health Agency of Sweden                                                                               | The Public Health Agency of Sweden                                                                         | Anna-Malin Linde, Maria Lind Karlberg, Carlo Berg, Oskar Karlsson Lindsjo, Sofia Stamouli, Reza Advani, Mattias Haukland, Petra Holmstrom, Noura Walai, Petra Edquist, Mia Brytting, Anna Risberg, Karin Tegmark-Wisell                                                            |
| EPI_ISL_915421                                 | MRCG at LSHTM Genomics lab                                                                                       | MRCG at LSHTM Genomics lab                                                                                 | Abdul Karim sesay, Abdoulie Kante, Jarra Manneh, Mariama Kujabi, Bakary Sanyang                                                                                                                                                                                                    |
| EPI_ISL_930909, EPI_ISL_931055, EPI_ISL_931165 | University Hospital Basel, Clinical Virology                                                                     | University Hospital Basel, Clinical Bacteriology                                                           | Tim Roloff, Madlen Stange, Helena MB Seth-Smith, Alfredo Mari, Karoline Leuzinger, Julia Bielicki, Manuel Battegay, Hans Hirsch, Adrian Egli                                                                                                                                       |
| EPI_ISL_932446                                 | Lighthouse Lab in Milton Keynes                                                                                  | Wellcome Sanger Institute for the COVID-19 Genomics UK (COG-UK) Consortium                                 | The Lighthouse Lab in Milton Keynes and Alex Alderton, Roberto Amato, Sonia Goncalves, Ewan Harrison, David K. Jackson, Ian Johnston, Dominic Kwiatkowski, Cordelia Langford, John Sillitoe on behalf of the Wellcome Sanger Institute COVID-19 Surveillance Team                  |
| EPI_ISL_933657                                 | Toronto Invasive Bacterial Diseases Network                                                                      | McMaster University                                                                                        | Allison McGeer, Patryk Aftanas, Hooman Derakhshani, Angel Li, Kuganya Nirmalarajah, Emily Panousis, Ahmed Draia, Jalees Nasir, Michael Surette, Samira Mubareka, Andrew G. McArthur                                                                                                |
| EPI_ISL_933719                                 | Laboratoire de Recherche et d'Analyses Medicales de la Gendarmerie Royale                                        | Laboratoire de Recherche et d'Analyses Medicales de la Gendarmerie Royale                                  | Sanaâ Lemriss, Amal Souiri, Nabil Lemzaoui, Mohammed Labioui, elmostafa El Fahime, S. El kabbaï                                                                                                                                                                                    |
| EPI_ISL_935017                                 | Laboratory for Respiratory Viruses, Cantacuzino National Military-Medical Institute for Research and Development | Cantacuzino Institute Virology                                                                             | Luiza Ustea, Nicoleta Paraschiv, Mihaela Lazar                                                                                                                                                                                                                                     |
| EPI_ISL_936487                                 | Infectious Disease Biology, Institute of Life Sciences                                                           | Infectious Disease Biology, Institute of Life Sciences                                                     | Syed,G.H., Singh,B., Avula,K., Ghosh,A., Jha,A., Laha,E.,Madhulika,S., Priyadarhini,M., Puwan,S.S., Singh,N., Singh,D.,Datey,A., Biswas,V.K., Das,R., Senapati,S., Beuria,T.K., Swain,R.,Prasad,P., Chattopadhyay,S., Raghav,S., Team,I.C. and Parida,A.                           |
| EPI_ISL_936549, EPI_ISL_936562, EPI_ISL_936568 | Northwestern Memorial Hospital                                                                                   | Ozer Lab                                                                                                   | Ramon Lorenzo-Redondo, Lacy M. Simons, Chad J. Achenbach, Lawrence J. Jennings, Michael G. Ison, Judd F. Hultquist, Egon A. Ozer                                                                                                                                                   |
| EPI_ISL_939629, EPI_ISL_939643, EPI_ISL_940146 | Laboratory of Virology and Molecular Diagnostics                                                                 | Institute of Public Health of Republic of North Macedonia Laboratory of Virology and Molecular Diagnostics | Maja Kuzmanovska, Golubinka Boshevska, Elizabeta Janchevska                                                                                                                                                                                                                        |
| EPI_ISL_940858, EPI_ISL_940878                 | Vaccines and Infectious Diseases Analytics Research Unit (VIDA)                                                  | KRISP, KZN Research Innovation and Sequencing Platform                                                     | Baillie Vicky, du Plessis Jeanine, Giandhari Jennifer, Pillay Sureshnee, Naidoo Yeshnee, Tegally Houriyah, de Oliveira Tulio, Madhi Shabir                                                                                                                                         |
| EPI_ISL_940996                                 | Sentinelles Idf                                                                                                  | National Reference Center for Viruses of Respiratory Infections, Institut Pasteur, Paris                   | Marion Barbet, Sylvie Behillil, Méline Bizard, Angela Brisebarre, Camille Capel, Etienne Simon-Lorière, Vincent Enouf, Maud Vanpeene, Sylvie van der Werf, Garrigues Anne                                                                                                          |
| EPI_ISL_940999                                 | Labo Analyses Med                                                                                                | National Reference Center for Viruses of Respiratory Infections, Institut Pasteur, Paris                   | Marion Barbet, Sylvie Behillil, Méline Bizard, Angela Brisebarre, Camille Capel, Etienne Simon-Lorière, Vincent Enouf, Maud Vanpeene, Sylvie van der Werf, Gestin (B) Briec                                                                                                        |
| EPI_ISL_941038, EPI_ISL_941046                 | Labo Analyses Med                                                                                                | National Reference Center for Viruses of Respiratory Infections, Institut Pasteur, Paris                   | Marion Barbet, Sylvie Behillil, Méline Bizard, Angela Brisebarre, Camille Capel, Etienne Simon-Lorière, Vincent Enouf, Maud Vanpeene, Sylvie van der Werf, Merah Kader                                                                                                             |
| EPI_ISL_944141                                 | National Health Laboratory Service, South Africa                                                                 | KRISP, KZN Research Innovation and Sequencing Platform                                                     | Laguda-Akingba O, Giandhari J, Pillay S, Lesells R, Mdlalose K, York D, Khan S, Emmanuel SJ, Tegally H, Wilkinson E, de Oliveira T                                                                                                                                                 |
| EPI_ISL_953809, EPI_ISL_953864                 | University Hospitals of Geneva, Laboratory of Virology                                                           | HUG, Laboratory of Virology and the Health2030 Genome Center                                               | Samuel Cordey, Ana Rita Goncalves, Laurent Kaiser, Lorenzo Cerutti, Henri Pegéot, Melyssa Elies, Deborah Penet, Keith Harshman, Ioannis Xenarios, Emmanouil Dermatzakis                                                                                                            |
| EPI_ISL_954016                                 | Hopital                                                                                                          | National Reference Center for Viruses of Respiratory Infections, Institut Pasteur, Paris                   | Marion Barbet, Sylvie Behillil, Méline Bizard, Angela Brisebarre, Camille Capel, Etienne Simon-Lorière, Vincent Enouf, Maud Vanpeene, Sylvie van der Werf,Larreche                                                                                                                 |
| EPI_ISL_955905                                 | Pamela Youde Nethersole Eastern Hospital                                                                         | Hong Kong Department of Health                                                                             | Alan K.L. Tsang, Peter C.W. Yip, Edman T.K. Lam, Rickjason C.W. Chan, Dominic N.C. Tsang                                                                                                                                                                                           |
| EPI_ISL_960087                                 | University Medical Center Hamburg Eppendorf                                                                      | Heinrich Pette Institute, Leibniz Institute for Experimental Virology                                      | Alexis Robitaille, Thomas Günther, Johannes Knobloch, Martin Apfelbacher, Nicole Fischer, Adam Grundhoff                                                                                                                                                                           |
| EPI_ISL_960094                                 | Victoria Hospital wc VHW                                                                                         | National Health Laboratory Service/UCT                                                                     | Arash Iranzadeh, Deelan Doolabh, Lynn Tyers, Bruna Galvao, Innocent Mudau, Marvin Hsiao, Kruger Marais, Diana Hardie, Stephen Korsman, Carolyn Williamson                                                                                                                          |
| EPI_ISL_960242                                 | Nucleic Acid Testing, National Reference Laboratory                                                              | GIGA Medical Genomics                                                                                      | Yvan Butera, Keith Durkin, Maria Artesi, Bouchra Boujemla, Robert Rutayisire, Patrick Tuyisenge, Esperence Umumararungu, Sébastien Bontems, Marie-Pierre Hayette, Nathalie Renotte, Corinne Fasquelle, Swaibu Gatara, Jacob Souopgui, Sabin Nsanzimana, Vincent Bours, Léon Mutesa |
| EPI_ISL_964930                                 | Instituto Nacional de Saude (INS), Mozambique                                                                    | KRISP, KZN Research Innovation and Sequencing Platform                                                     | Nalia Ismael, Nadia Siteo, Paulo Arnaldo, Nedio Mabunda, Giandhari J, Pillay S, Emmanuel S, Tegally H, Wilkinson E, de Oliveira T                                                                                                                                                  |
| EPI_ISL_964949                                 | Laboratorio de Virologia del HUCA                                                                                | Laboratorio de Virologia del HUCA                                                                          | Castelló C, Gómez de Oña J, Boga JA, Rojo S, Alvarez-Arguelles ME, Abreu F, Costales I, Sandoval M, Perez-Martinez Z, Martín-Rodríguez G, Coto E, Melon S                                                                                                                          |
| EPI_ISL_965922                                 | Servicio Murciano de Salud                                                                                       | Instituto de Salud Carlos III                                                                              | Vázquez, S. Iglesias-Caballero, M. Sandoñis,V. Camarero, S. Pozo, F. Casas, I. Jiménez, P. Zaballós, A. Monzón, S. Varona, S. Cuesta, I. Blázquez, A.                                                                                                                              |
| EPI_ISL_970333, EPI_ISL_971374, EPI_ISL_973716 | BCCDC Public Health Laboratory                                                                                   | BCCDC Public Health Laboratory                                                                             | Prystajecy Natalie, Linda Hoang, Dan Fornika, John Tyson, Shannon Russell, Kim Macdonald, Kimia Kamelian, Ana Pacagnella, Corrinne Ng, Loretta Janz, Robert Azana Terry Snutch, Mel Kraiden                                                                                        |
| EPI_ISL_979544, EPI_ISL_979801                 | National Institute of Infectious Diseases-Prof. Dr. Matei Bals Molecular Diagnostics Laboratory                  | National Institute of Infectious Diseases-Prof. Dr. Matei Bals Molecular Diagnostics Laboratory            | Leontina Banica, Marius Surleac, Corina Casangiu, Petre Milu, Andreea Tudor, Simona Paraschiv, Dan Otelea                                                                                                                                                                          |
| EPI_ISL_985090, EPI_ISL_985102                 | Biorepository and Clinical Virology Laboratory                                                                   | Ozer Lab                                                                                                   | Ramon Lorenzo-Redondo, Adeola A. Fowotade, Ewean C. Omoruyi, Johnson A. Adeniji, Lacy M. Simons, Judd F. Hultquist, Babafemi O. Taiwo, Olubusuyi M. Adewumi, Egon A. Ozer                                                                                                          |
| EPI_ISL_992956                                 | Laboratorio de Virología HUCA                                                                                    | Laboratorio de Virología Hospital Universitario Central de Asturias (HUCA)                                 | Sandoval M, Castelló C, Gómez de Oña J, Boga JA, Rojo S, Alvarez-Arguelles ME, Abreu F, Costales I, Perez-Martinez Z, Martín-Rodríguez G, Coto E, Melón S                                                                                                                          |
| EPI_ISL_995966, EPI_ISL_995967                 | Department of Virology and Immunology, University of Helsinki and Helsinki University Hospital, Huslab Finland   | Department of Virology, Faculty of Medicine, University of Helsinki, Helsinki, Finland                     | Teemu Smura, Ravi Kant, Phuoc Truong, Hussein Alburkat, Hannimari Kallio-Kokko, Jenni Virtanen, Maija Suvanto, Essi Korhonen, Sari Hannula, Harri Kangas, Hanna Liimatainen, Satu Kurkela, Hanna Jarva, Maija Lappalainen, Pekka Eltonen, Olli Vapalahti                           |
